# Supplementary material for: β-Lactam TRPM8 Antagonists Derived from Phe-Phenylalaninol Conjugates: Structure–Activity Relationships and Antiallodynic Activity
Source: MDPI journal article supplement (doi:10.3390/ijms241914894), 2023-10-04
Supplement: s1 [file s1]

# **$\beta$ -Lactam TRPM8 antagonists derived from Phe-phenylalaninol conjugates: structure-activity relationships and antiallodynic activity**

**Cristina Martín-Escura, M<sup>a</sup> Angeles Bonache, Jessy Medina, Alicia Medina-Peris, Jorge De Andrés-López, Sara González-Rodríguez, Sara Kerselaers, Gregorio Fernández-Ballester, Thomas Voets, Antonio Ferrer-Montiel, Asia Fernández-Carvajal, Rosario González-Muñiz**

## **Supplementary Materials**

|                                                                                             |     |
|---------------------------------------------------------------------------------------------|-----|
| 1- Calculated TPSA Values                                                                   | S2  |
| 2- Synthetic Methods, Intermediates, and Diastereoisomeric $\beta$ -Lactam Characterization | S6  |
| 3- Molecular Modeling: protocols and detailed interactions                                  | S26 |

**Table S1.** Total Polar Surface Area (TPSA) calculated for new  $\beta$ -lactam derivatives and model 1.

| Compound | Formula                                                                             | <sup>a</sup> TPSA, Å <sup>2</sup> |
|----------|-------------------------------------------------------------------------------------|-----------------------------------|
| 1        | 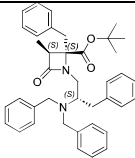   | 49.85                             |
| 4        |    | 52.65                             |
| 5        |    | 52.65                             |
| 6        |    | 52.65                             |
| 7        |   | 65.01                             |
| 8        |  | 65.01                             |
| 9        |  | 65.01                             |
| 13       |  | 58.64                             |
| 14       |  | 58.64                             |

|    |                                                                                     |       |
|----|-------------------------------------------------------------------------------------|-------|
| 15 | 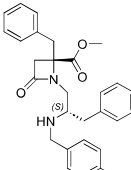   | 58.64 |
| 16 |    | 58.64 |
| 17 |    | 58.64 |
| 18 |    | 67.87 |
| 19 |   | 61.44 |
| 20 |  | 61.44 |
| 21 |  | 61.44 |
| 22 |  | 61.44 |
| 23 |  | 61.44 |

|    |                                                                                     |        |
|----|-------------------------------------------------------------------------------------|--------|
| 24 | 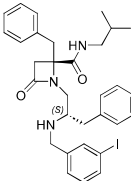   | 61.44  |
| 25 |    | 70.67  |
| 26 |    | 70.67  |
| 27 |    | 70.67  |
| 28 |   | 85.23  |
| 29 |  | 113.25 |
| 30 |  | 61.44  |
| 31 |  | 61.44  |
| 32 |  | 61.44  |

|    |                                                                                     |       |
|----|-------------------------------------------------------------------------------------|-------|
| 34 | 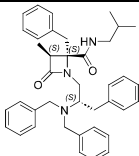   | 52.65 |
| 35 |    | 52.65 |
| 36 |    | 65.01 |
| 37 |    | 58.64 |
| 40 |   | 58.64 |
| 41 |  | 58.64 |
| 42 |  | 61.44 |
| 43 |  | 61.44 |
| 44 |  | 61.44 |

|    |                                                                                   |       |
|----|-----------------------------------------------------------------------------------|-------|
| 45 | 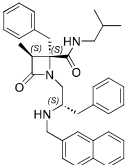 | 61.44 |
|----|-----------------------------------------------------------------------------------|-------|

<sup>a</sup> Calculated with ChemDraw 22.2.0.

## Synthetic Methods

**General procedures:** Reactions were monitored either by TLC and/or analytic HPLC (UV, detection, 220 nm). Flash columns, filled with silica gel Merck 60 (230–400) were used for chromatographic separations. A reversed-phase column, Sunfire C18 (Waters, Barcelona, Spain; 4.6 × 50 mm, 3.5 μm), a flux of 1 mL/min, and mixtures of CH<sub>3</sub>CN, phase A, and H<sub>2</sub>O, phase B, both containing 0.01% formic acid, were used for analytical HPLCs. Mass spectra, in electrospray, positive mode, were obtained on a Waters Micromass ZQ spectrometer (Waters, Barcelona, Spain). High resolution mass spectrum (ESI-HRMS) was recorded on an Agilent 6520 Q-TOF instrument (Agilent, Madrid, Spain). Optical rotation for final compounds was measured in a polarimeter Perkin Elmer 141 apparatus (Perkin Elmer España, SL, Madrid, Spain). NMR spectra were recorded in a Varian INOVA-400 (400 MHz) spectrometer or Bruker 300 (Bruker Española SA, Rivas-Vaciamadrid, Spain), operating at 400 and 75 MHz for <sup>1</sup>H and <sup>13</sup>C experiments, respectively (with chemical shifts expressed in ppm and coupling constants in Hz). Bidimensional COSY and HSQC experiments were used for assignments when required. Reactives: HCl/Dioxano, PyBroP, TEA, BTPP, aldehydes, amines and dry solvents were acquired from Merck KGaA (Madrid, Spain). Solvents: HPLC grade MeOH, EtOAc, dichloromethane, acetonitrile were purchased from Symta SLL (Madrid, Spain). β-Lactam derivatives derivatives **1** and **2a,b** were prepared as described [1,2].

### **General procedures for the synthesis of carboxylic acid intermediates**

**Hydrolysis of methyl esters:** To a solution of the corresponding substitute β-lactam 4-alkoxycarbonyl (1.71 mmol) in MeOH (20 mL) is added 2M NaOH (2.57 mmol, 1.21 mL). Then, the reaction mixture is stirred at room temperature. Once disappearance of the starting product, the solvent is evaporated to dryness. The resulting residue is dissolved in EtOAc:H<sub>2</sub>O (1:1), separating the phases and the aqueous phase is brought to pH 3 with 1M HCl and extracted with EtOAc. The organic phase is washed with saturated NaCl solution, dried over anhydrous Na<sub>2</sub>SO<sub>4</sub>, filtered and evaporated to dryness. The resulting crude is purified on a silica gel column, using the eluent system indicated in each case.

**Hydrolysis of tert-butyl esters:** To a solution of the corresponding substituted β-lactam 4-*tert*-butoxycarbonyl (1.019 mmol) in DCM (5 mL) is added 4M HCl/Dioxano (10.19 mmol, 2.5 mL) and the reaction mixture is stirred at room temperature. Once completed, the solvent is evaporated to dryness. The resulting crude is purified on a silica gel column, using the eluent system indicated in each case.

**General procedure for the synthesis of substituted 4-carboxamides .** To a solution of β-lactam 4-carboxylate (0.188 mmol) in dry DCM (5 mL) is added PyBroP (0.225 mmol, 0.105 g), TEA (0.225 mmol, 0.031 mL) and the corresponding amine (0.225 mmol). The reaction is stirred at room temperature, and after disappearance of the starting product, the solvent is evaporated to dryness. The crude obtained is dissolved in EtOAc, washed with 0.1 M HCl, NaHCO<sub>3</sub> (10%) and

saturated NaCl solution. The organic phase is dried over anhydrous Na<sub>2</sub>SO<sub>4</sub>, filtered and evaporated to dryness. The resulting crude is purified on a silica gel column, using the eluent system indicated in each case.

**General procedure for *N*-debenzylation.** A solution of the corresponding  $\beta$ -lactam derivative with NBN<sub>2</sub> (1.17 mmol) in MeOH (20 mL) is cooled to 0 °C and 10 wt.% Pd(OH)<sub>2</sub> is slowly added followed by 1M HCl (1.17 mL, 1.17 mmol). The mixture is hydrogenated in a Parr at 45-47 psi H<sub>2</sub> and 40 °C for 4 h. The catalyst is removed by filtration and the solvent is evaporated to dryness. The resulting crude is purified on a silica gel column, using the eluent system indicated in each case.

**General procedure for Synthesis of 2'-*N*-monobenzyl derivatives.** To a solution of the corresponding substituted  $\beta$ -lactam 2'-NH<sub>2</sub> derivative (0.225 mmol) in MeOH (4 mL) is added TEA (0.225 mmol, 0.031 mL) and the corresponding aldehyde (0.337 mmol). The reaction mixture is stirred for 1.5 h at room temperature. Once the imine is formed, NaBH<sub>4</sub> (0.450 mmol, 0.017 g) is added at 0 °C and stirred at room temperature. After 24 hours of reaction, the solvent is evaporated to dryness. The organic residue is dissolved in EtOAc and washed with H<sub>2</sub>O and saturated NaCl solution successively. The organic phase is dried over anhydrous Na<sub>2</sub>SO<sub>4</sub>, filtered and evaporated to dryness. The resulting crude is purified on a silica gel column, using the eluent system indicated in each case.

#### 4*R,S*-Benzyl-4-carboxy-1-[(2'*S*-dibenzylamino-3'-phenyl)prop-1'-yl]-2-oxoazetidine (**3a,b**)

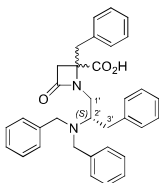

White solid. Yield: 90% (From **2a,b**). Eluent: 2% to 9% of MeOH in DCM. HPLC:  $t_R$  = 7.02 (m, **3a**) y 7.22 (M, **3b**) min (gradient from 20% to 95% of A in 10 min). Ratio of diastereoisomers M:m, 1.8:1. <sup>1</sup>H-NMR (300 MHz, CDCl<sub>3</sub>, major diastereoisomer **3b**, from the mixture):  $\delta$  7.61 - 7.35 (m, 12H, Ar), 7.33 - 7.04 (m, 4H, Ar), 6.98 (d,  $J$  = 7.5 Hz, 1H, Ar), 6.86 (t,  $J$  = 7.4 Hz, 1H, Ar), 6.70 (t,  $J$  = 7.6 Hz, 1H, Ar), 6.42 (d,  $J$  = 7.3 Hz, 1H, Ar), 4.38 (s, 2H, NCH<sub>2</sub>), 3.93 (d,  $J$  = 12.2 Hz, 1H, 4-CH<sub>2</sub>), 3.84 (dd,  $J$  = 14.9, 10.3 Hz, 1H, H<sub>1'</sub>), 3.63 (d,  $J$  = 13.1 Hz, 2H, NCH<sub>2</sub>), 3.33 (d,  $J$  = 15.1 Hz, 1H, H<sub>3</sub>), 3.12 (dd,  $J$  = 13.0, 3.4 Hz, 1H, H<sub>3'</sub>), 3.06 (d,  $J$  = 15.1 Hz, 1H, H<sub>3</sub>), 2.82 - 2.64 (m, 3H, 4-CH<sub>2</sub>, H<sub>2'</sub>, H<sub>1'</sub>), 2.55 (m, 1H, H<sub>3'</sub>). <sup>13</sup>C-NMR (75 MHz, CDCl<sub>3</sub>):  $\delta$  175.8 (COOH), 169.7 (C<sub>2</sub>), 136.5, 130.9, 130.2, 129.4, 129.2, 129.2, 129.0, 128.9, 128.8, 128.7, 127.2, 126.9 (Ar), 66.5 (C<sub>4</sub>), 55.4 (C<sub>2'</sub>), 54.1 (NCH<sub>2</sub>), 50.8 (C<sub>3</sub>), 41.3 (C<sub>1'</sub>), 40.6 (4-CH<sub>2</sub>), 32.4 (C<sub>3'</sub>). <sup>1</sup>H-NMR (300 MHz, CDCl<sub>3</sub>, minor diastereoisomer **3a**, from the mixture):  $\delta$  7.61 - 7.35 (m, 13H, Ar), 7.33 - 7.04 (m, 4H, Ar), 6.98 (d,  $J$  = 7.5 Hz, 1H, Ar), 6.70 (t,  $J$  = 7.6 Hz, 1H, Ar), 6.42 (d,  $J$  = 7.3 Hz, 1H, Ar), 3.93 (m, 3H, NCH<sub>2</sub>, H<sub>2'</sub>), 3.61 (d,  $J$  = 13.1 Hz, 2H, NCH<sub>2</sub>), 3.21 (dd,  $J$  = 16.0, 2.6 Hz, 1H, H<sub>1'</sub>), 3.08 (m, 1H, H<sub>3'</sub>), 3.01 (d,  $J$  = 14.9 Hz, 1H, H<sub>3</sub>), 2.88 (d,  $J$  = 13.8 Hz, 1H, 4-CH<sub>2</sub>), 2.82 - 2.64 (m, 3H, H<sub>3</sub>, H<sub>1'</sub>, 4-CH<sub>2</sub>), 2.60 - 2.45 (m, 1H, H<sub>3'</sub>). <sup>13</sup>C-NMR (75 MHz, CDCl<sub>3</sub>):  $\delta$  175.6 (COOH), 167.2 (C<sub>2</sub>), 136.9, 134.4, 131.1, 130.7, 129.8, 129.6, 129.5, 129.0, 128.9, 128.7, 128.1, 127.6 (Ar), 65.5 (C<sub>4</sub>), 59.7 (C<sub>2'</sub>), 54.1 (NCH<sub>2</sub>), 48.6 (C<sub>3</sub>), 41.7 (C<sub>1'</sub>), 40.8 (4-CH<sub>2</sub>), 29.8 (C<sub>3'</sub>). MS(ES)<sup>+</sup>: 519.31 [M+H]<sup>+</sup>.

#### 4*R,S*-Benzyl-4-[*N*-(*iso*-butyl)carbamoyl]-1-[(2'*S*-dibenzylamino-3'-phenyl)prop-1'-yl]-2-oxoazetidine (**4a,b**)

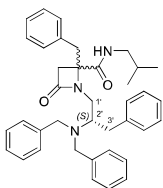

Syrup. Yield: 92% (From **3a,b** and *iso*-butylamine). Eluent: 16% to 33% of EtOAc in hexane. HPLC:  $t_R$  = 7.57 (m, a) y 8.43 (M, b) min (gradient from 15% to 95% of A in 10 min). Ratio of diastereoisomers M:m, 1.6:1.  $^1\text{H-NMR}$  (300 MHz,  $\text{CDCl}_3$ , major diastereoisomer **4b**, from the mixture):  $\delta$  7.40 - 7.00 (m, 20H, Ar), 5.51 (t,  $J$  = 5.9 Hz, 1H, NH), 3.90 (dd,  $J$  = 14.2, 4.7 Hz, 1H,  $\text{H}_{1'}$ ), 3.80 (d,  $J$  = 13.8 Hz, 2H,  $\text{NCH}_2$ ), 3.70 (d,  $J$  = 13.8 Hz, 2H,  $\text{NCH}_2$ ), 3.50 (dd,  $J$  = 14.2, 9.1 Hz, 1H,  $\text{H}_{1'}$ ), 3.27 (m, 1H,  $\text{H}_{2'}$ ), 3.10 (d,  $J$  = 13.6 Hz, 1H, 4- $\text{CH}_2$ ), 2.98 - 2.85 (m, 5H,  $\text{H}_3$ ,  $\text{H}_{3'}$  y  $\text{CH}_2$ ,  $\text{Bu}$ ), 2.83 (m, 1H,  $\text{H}_{3'}$ ), 2.47 (d,  $J$  = 13.6 Hz, 1H, 4- $\text{CH}_2$ ), 1.54 (m, 1H, CH,  $\text{Bu}$ ), 0.76 (d,  $J$  = 6.7 Hz, 3H,  $\text{CH}_3$ ,  $\text{Bu}$ ), 0.72 (d,  $J$  = 6.7 Hz, 3H,  $\text{CH}_3$ ,  $\text{Bu}$ ).  $^{13}\text{C-NMR}$  (75 MHz,  $\text{CDCl}_3$ ):  $\delta$  170.4 (4-CONH), 166.6 ( $\text{C}_2$ ), 140.0, 139.5, 135.4, 129.6, 129.4, 129.0, 128.8, 128.3, 127.5, 127.1, 126.2 (Ar), 64.2 ( $\text{C}_4$ ), 59.0 ( $\text{C}_{2'}$ ), 53.3 ( $\text{NCH}_2$ ), 47.2 ( $\text{C}_3$ ), 46.2 ( $\text{CH}_2$ ,  $\text{Bu}$ ), 42.0 ( $\text{C}_{1'}$ ), 40.8 (4- $\text{CH}_2$ ), 36.6 ( $\text{C}_{3'}$ ), 28.3 (CH,  $\text{Bu}$ ), 20.2 ( $\text{CH}_3$ ,  $\text{Bu}$ ).  $^1\text{H-NMR}$  (300 MHz,  $\text{CDCl}_3$ , minor diastereoisomer **4a**, from the mixture):  $\delta$  7.40 - 6.90 (m, 20H, Ar), 5.30 (t,  $J$  = 5.9 Hz, 1H, NH), 3.77 (d,  $J$  = 13.5 Hz, 2H,  $\text{NCH}_2$ ), 3.60 (d,  $J$  = 13.7 Hz, 2H,  $\text{NCH}_2$ ), 3.46 (dd,  $J$  = 14.1, 9.0 Hz, 1H,  $\text{H}_{1'}$ ), 3.24 (m, 2H,  $\text{H}_{2'}$ ,  $\text{H}_{1'}$ ), 3.00 (dd,  $J$  = 14.8, 5.9 Hz, 1H,  $\text{H}_{3'}$ ), 2.98 - 2.85 (m, 4H,  $\text{H}_3$ ,  $\text{CH}_2$ ,  $\text{Bu}$ ), 2.74 (d,  $J$  = 13.9 Hz, 1H, 4- $\text{CH}_2$ ), 2.62 (m, 1H,  $\text{H}_{3'}$ ), 2.41 (d,  $J$  = 14.1 Hz, 1H, 4- $\text{CH}_2$ ), 1.41 (m, 1H, CH,  $\text{Bu}$ ), 0.65 (d,  $J$  = 6.7 Hz, 3H,  $\text{CH}_3$ ,  $\text{Bu}$ ), 0.63 (d,  $J$  = 6.7 Hz, 3H,  $\text{CH}_3$ ,  $\text{Bu}$ ).  $^{13}\text{C-NMR}$  (75 MHz,  $\text{CDCl}_3$ ):  $\delta$  170.3 (4-CONH), 166.6 ( $\text{C}_2$ ), 140.0, 139.6, 135.6, 129.5, 129.3, 128.9, 128.6, 128.4, 127.3, 127.2, 126.4 (Ar), 63.7 ( $\text{C}_4$ ), 60.3 ( $\text{C}_{2'}$ ), 53.6 ( $\text{NCH}_2$ ), 47.0 ( $\text{C}_3$ ), 46.9 ( $\text{CH}_2$ ,  $\text{Bu}$ ), 42.02 ( $\text{C}_{1'}$ ), 39.6 (4- $\text{CH}_2$ ), 34.7 ( $\text{C}_{3'}$ ), 28.3 (CH,  $\text{Bu}$ ), 20.1, 20.0 ( $\text{CH}_3$ ,  $\text{Bu}$ ). MS(ES) $^+$ : 574.42 [M+H] $^+$ . Exact mass calculated for  $\text{C}_{38}\text{H}_{43}\text{N}_3\text{O}_2$ : 573.33553, found 573.33717.

**4R,S-Benzyl-4-[N-(benzyl)carbamoyl]-1-[(2'S-dibenzylamino-3'-phenyl)prop-1'-yl]-2-oxoazetidine (5a,b)**

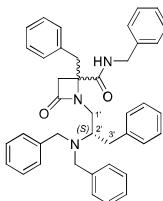

Syrup. Yield: 38% (From **3a,b** and benzylamine). Eluent: 10% to 30% of EtOAc in DCM. HPLC:  $t_R$  = 7.72 (m, 2.11a) y 8.87 (M, 2.11b) min (gradient from 15% to 95% of A in 10 min). Ratio of diastereoisomers M:m, 2.6:1.  $^1\text{H-NMR}$  (300 MHz,  $\text{CDCl}_3$ , major diastereoisomer **5b**, from the mixture):  $\delta$  7.30 - 6.95 (m, 25H, Ar), 6.10 (t,  $J$  = 5.7 Hz, 1H, NH), 4.24 (d,  $J$  = 5.7 Hz, 2H,  $\text{NHCH}_2$ , Bn), 3.84 (dd,  $J$  = 14.3, 5.2 Hz, 1H,  $\text{H}_{1'}$ ), 3.74 (d,  $J$  = 13.5 Hz, 2H,  $\text{NCH}_2$ ), 3.67 (d,  $J$  = 13.8 Hz, 2H,  $\text{NCH}_2$ ), 3.42 (dd,  $J$  = 14.2, 8.8 Hz, 1H,  $\text{H}_{1'}$ ), 3.24 (m, 1H,  $\text{H}_{2'}$ ), 3.12 (d,  $J$  = 13.7 Hz, 1H, 4- $\text{CH}_2$ ), 2.95 (d,  $J$  = 14.9 Hz, 1H,  $\text{H}_3$ ), 2.91 (d,  $J$  = 14.7 Hz, 1H,  $\text{H}_3$ ), 2.86 (dd,  $J$  = 13.4, 9 Hz, 1H,  $\text{H}_{3'}$ ), 2.72 (dd,  $J$  = 13.8, 6.2 Hz, 1H,  $\text{H}_{3'}$ ), 2.61 (d,  $J$  = 13.7 Hz, 1H, 4- $\text{CH}_2$ ).  $^{13}\text{C-NMR}$  (75 MHz,  $\text{CDCl}_3$ ):  $\delta$  170.5 (4-CONH), 166.8 ( $\text{C}_2$ ), 139.9, 139.3, 137.5, 135.2, 129.7, 129.4, 129.0, 128.9, 128.8, 128.4, 128.0, 127.8, 127.4, 127.1, 126.2 (Ar), 64.2 ( $\text{C}_4$ ), 59.1 ( $\text{C}_{2'}$ ), 53.2 ( $\text{NCH}_2$ ), 46.3 ( $\text{C}_3$ ), 43.9 ( $\text{NHCH}_2$ , Bn), 42.0 ( $\text{C}_{1'}$ ), 40.6 (4- $\text{CH}_2$ ), 36.4 ( $\text{C}_{3'}$ ).  $^1\text{H-NMR}$  (300 MHz,  $\text{CDCl}_3$ , minor diastereoisomer **5a**, from the mixture):  $\delta$  7.30 - 6.90 (m, 25H, Ar), 6.15 (t,  $J$  = 5.7 Hz, 1H, NH), 4.14 (dd,  $J$  = 14.7, 6.0 Hz, 1H,  $\text{NHCH}_2$ , Bn), 3.73 (m, 1H,  $\text{NHCH}_2$ , Bn), 3.72 (d,  $J$  = 13.5 Hz, 2H,  $\text{NCH}_2$ ), 3.55 (d,  $J$  = 13.5 Hz, 2H,  $\text{NCH}_2$ ), 3.34 (m, 2H,  $\text{H}_{2'}$ ,  $\text{H}_{1'}$ ), 3.00 (dd,  $J$  = 13.8, 5.3 Hz, 1H,  $\text{H}_{3'}$ ), 2.96 (m, 1H,  $\text{H}_3$ ), 2.93 (m, 1H,  $\text{H}_{1'}$ ), 2.85 (d,  $J$  = 14.0

Hz, 1H, 4-CH<sub>2</sub>), 2.84 (d, *J* = 12.8 Hz, 1H, H<sub>3</sub>), 2.60 (d, *J* = 14.0 Hz, 1H, 4-CH<sub>2</sub>) 2.53 (dd, *J* = 13.8, 8.5 Hz, 1H, H<sub>3'</sub>). <sup>13</sup>C-NMR (75 MHz, CDCl<sub>3</sub>): δ 170.5 (4-CONH), 166.6 (C<sub>2</sub>), 139.7, 139.2, 137.7, 135.6, 129.6, 129.4, 128.8, 128.7, 128.6, 128.4, 128.0, 127.8, 127.6, 127.3, 126.4 (Ar), 63.8 (C<sub>4</sub>), 60.1 (C<sub>2'</sub>), 53.8 (NCH<sub>2</sub>), 47.1 (C<sub>3</sub>), 43.4 (NHCH<sub>2</sub>, Bn), 42.5 (C<sub>1'</sub>), 39.8 (4-CH<sub>2</sub>), 34.3 (C<sub>3'</sub>). MS(ES)<sup>+</sup>: 608.26 [M+H]<sup>+</sup>. Exact mass calculated for C<sub>41</sub>H<sub>41</sub>N<sub>3</sub>O<sub>2</sub>: 607.31988, found 607.31848.

**4*R*-Benzyl-4-[*N*-(3,4-dichlorobenzyl)carbamoyl]-1-[(2'*S*-dibenzylamino-3'- phenyl)prop -1'-yl]-2-oxoazetidine (6a)**

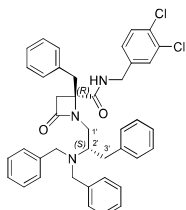

Syrup. Yield: 15% (From **3a,b** and 3,4-dichlorobenzylamine). Eluent: 3% to EtOAc in DCM. HPLC: *t*<sub>R</sub> = 8.58 min (gradient from 30% to 95% of A in 10 min). <sup>1</sup>H-NMR (300 MHz, CDCl<sub>3</sub>): δ 7.53 - 6.69 (m, 23H, Ar), 6.46 (t, *J* = 5.9 Hz, 1H, NH), 4.14 (dd, *J* = 14.9, 6.0 Hz, 1H, NHCH<sub>2</sub>, Bn), 4.07 (dd, *J* = 14.9, 5.8 Hz, 1H, NHCH<sub>2</sub>, Bn), 3.86 (dd, *J* = 14.5, 6.3 Hz, 1H, H<sub>1'</sub>), 3.74 (s, 4H, 2 NCH<sub>2</sub>), 3.34 (dd, *J* = 14.5, 7.7 Hz, 1H, H<sub>1'</sub>), 3.20 (m, 1H, H<sub>2'</sub>), 3.11 (d, *J* = 13.9 Hz, 1H, 4-CH<sub>2</sub>), 2.96 (s, 2H, H<sub>3</sub>), 2.87 (dd, *J* = 13.9, 6.7 Hz, 1H, H<sub>3'</sub>), 2.72 (d, *J* = 13.9 Hz, 1H, 4-CH<sub>2</sub>), 2.63 (dd, *J* = 13.9, 7.2 Hz, 1H, H<sub>3'</sub>). <sup>13</sup>C-NMR (75 MHz, CDCl<sub>3</sub>): δ 171.1 (4-CONH), 167.0 (C<sub>2</sub>), 139.7, 139.1, 138.0, 135.1, 132.8, 131.8, 130.7, 129.9, 129.7, 129.3, 129.1, 128.9, 128.5, 128.5, 127.6, 127.3, 127.3, 126.3 (Ar), 64.2 (C<sub>4</sub>), 59.6 (C<sub>2'</sub>), 53.2 (NCH<sub>2</sub>), 46.9 (C<sub>3</sub>), 42.7 (NCH<sub>2</sub>, Bn), 42.0 (C<sub>1'</sub>), 40.0 (4-CH<sub>2</sub>), 36.1 (C<sub>3'</sub>). MS(ES)<sup>+</sup>: 676.63 [M+H]<sup>+</sup>, 678.62 [M+2]<sup>+</sup>, 680.61 [M+4]<sup>+</sup>. Exact mass calculated for C<sub>41</sub>H<sub>39</sub>Cl<sub>2</sub>N<sub>3</sub>O<sub>2</sub>: 675.24193, found 675.24237.

**4*R,S*-Benzyl-4-[*N*-(3,4-dichlorobenzyl)carbamoyl]-1-[(2'*S*-dibenzylamino-3'- phenyl)prop -1'-yl]-2-oxoazetidine (6a,b)**

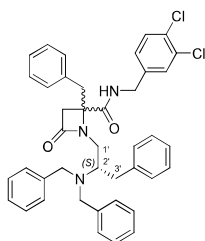

Syrup. Yield: 46% (From **3a,b** and 3,4-dichlorobenzylamine). Eluent: 3% to EtOAc in DCM. HPLC: *t*<sub>R</sub> = 6.82 (M, **6b**) y 8.33 (m, **6a**) min (gradient from 30% to 95% of A in 10 min). Ratio of diastereoisomers M:m, 1.4:1. <sup>1</sup>H-NMR (300 MHz, CDCl<sub>3</sub>, major diastereoisomer **6b**, from the mixture): δ 7.39 - 6.93 (m, 23H, Ar), 6.75 (s, 1H, NH), 4.10 (m, 2H, NHCH<sub>2</sub>, Bn), 3.86 (dd, *J* = 14.3, 6.2 Hz, 1H, H<sub>1'</sub>), 3.77 (s, 4H, NCH<sub>2</sub>), 3.25 (dd, *J* = 14.5, 3.7 Hz, 1H, H<sub>1'</sub>), 3.16 (m, 3H, H<sub>2</sub>, 4-CH<sub>2</sub>, H<sub>3'</sub>), 3.12 (d, *J* = 14.5 Hz, 1H, H<sub>3</sub>), 2.84 (d, *J* = 14.7 Hz, 1H, H<sub>3</sub>), 2.77 (m, 1H, 4-CH<sub>2</sub>), 2.75 (dd, *J* = 13.9, 7.3 Hz, 1H, H<sub>3'</sub>). <sup>13</sup>C-NMR (75 MHz, CDCl<sub>3</sub>): δ 171.1 (4-CONH), 166.6 (C<sub>2</sub>), 138.2, 135.0, 132.6, 131.6, 130.6, 129.9, 129.7, 129.6, 129.4, 129.3, 129.2, 128.9, 128.8, 128.6, 128.5, 127.6, 127.3, 126.4 (Ar), 63.9 (C<sub>4</sub>), 59.6 (C<sub>2'</sub>), 54.1 (NCH<sub>2</sub>), 47.5 (C<sub>3</sub>), 42.8 (NHCH<sub>2</sub>, Bn), 42.0 (C<sub>1'</sub>), 40.1 (4-CH<sub>2</sub>), 33.8 (C<sub>3'</sub>). MS(ES)<sup>+</sup>: 676.63 [M+H]<sup>+</sup>, 678.62 [M+2]<sup>+</sup>, 680.61 [M+4]<sup>+</sup>.

**4*R,S*-Benzyl-4-[*N*-(3''-pyridyl)carbamoyl]-1-[(2'*S*-dibenzylamino-3'-phenyl)prop-1'-yl]-2-oxoazetidine (7a,b)**

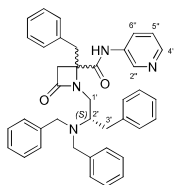

Syrup. Yield: 85% (From **3a,b** and 3-aminopyridine). Eluent: 1% to 10% of MeOH in DCM. HPLC:  $t_R$  = 6.65 (m, **7a**) y 7.07 (M, **7b**) min (gradient from 15% to 95% of A in 10 min). Ratio of diastereoisomers M:m, 1.4:1.  $^1\text{H-NMR}$  (300 MHz,  $\text{CDCl}_3$ , major diastereoisomer **7b**, from the mixture):  $\delta$  8.30 (m, 1H, Ar), 8.02 (s, 1H, NH), 7.65 - 6.90 (m, 23H, Ar), 3.97 (dd,  $J$  = 14.5, 6.3 Hz, 1H,  $\text{H}_{1'}$ ), 3.75 (s, 4H,  $\text{NCH}_2$ ), 3.37 (m, 2H,  $\text{H}_{1'}$ ), 3.24 (m 1H,  $\text{H}_{2'}$ ), 3.14 (d,  $J$  = 13.9 Hz, 1H, 4- $\text{CH}_2$ ), 3.08 (s, 2H,  $\text{H}_3$ ), 2.92 (dd,  $J$  = 13.9, 6.8 Hz, 1H,  $\text{H}_{3'}$ ), 2.67 (dd,  $J$  = 14.1, 7.2 Hz, 1H,  $\text{H}_{3'}$ ), 2.56 (d,  $J$  = 13.7 Hz, 1H, 4- $\text{CH}_2$ ).  $^{13}\text{C-NMR}$  (75 MHz,  $\text{CDCl}_3$ ):  $\delta$  170.1 (4-CONH), 167.1 ( $\text{C}_2$ ), 146.2, 142.4, 139.5, 138.9, 135.0, 133.7, 129.7, 129.4, 129.4, 129.2, 128.5, 128.5, 127.7, 127.4, 126.3, 123.6 (Ar), 64.7 ( $\text{C}_4$ ), 58.9 ( $\text{C}_{2'}$ ), 53.5 ( $\text{NCH}_2$ ), 47.3 ( $\text{C}_3$ ), 42.3 ( $\text{C}_{1'}$ ), 40.4 (4- $\text{CH}_2$ ), 35.8 ( $\text{C}_{3'}$ ).  $^1\text{H-NMR}$  (300 MHz,  $\text{CDCl}_3$ , minor diastereoisomer **7a**, from the mixture):  $\delta$  7.89 (s, 1H, NH), 7.39 - 7.00 (m, 24H, Ar), 3.80 (d,  $J$  = 13.6 Hz, 2H,  $\text{NCH}_2$ ), 3.60 (d,  $J$  = 13.4 Hz, 2H,  $\text{NCH}_2$ ), 3.54 (m, 1H,  $\text{H}_{1'}$ ), 3.37 (m, 1H,  $\text{H}_{1'}$ ), 3.32 (m 1H,  $\text{H}_{2'}$ ), 3.04 (d,  $J$  = 14.5 Hz,  $\text{H}_3$ ), 2.95 (d,  $J$  = 14.5 Hz,  $\text{H}_3$ ), 2.92 - 2.80 (m, 3H,  $\text{H}_{3'}$ , 4- $\text{CH}_2$ ), 2.60 (m, 1H,  $\text{H}_{3'}$ ).  $^{13}\text{C-NMR}$  (75 MHz,  $\text{CDCl}_3$ ):  $\delta$  169.8 (4-CONH), 166.4 ( $\text{C}_2$ ), 146.0, 142.2, 139.7, 139.2, 135.4, 133.5, 129.7, 129.3, 129.1, 128.6, 128.4, 128.3, 127.8, 127.3, 126.4, 123.5 (Ar), 64.2 ( $\text{C}_4$ ), 60.2 ( $\text{C}_{2'}$ ), 53.9 ( $\text{NCH}_2$ ), 47.2 ( $\text{C}_3$ ), 42.4 ( $\text{C}_{1'}$ ), 40.0 (4- $\text{CH}_2$ ), 34.3 ( $\text{C}_{3'}$ ). MS(ES) $^+$ : 595.40 [ $\text{M}+\text{H}$ ] $^+$ . Exact mass calculated for  $\text{C}_{39}\text{H}_{38}\text{N}_4\text{O}_2$ : 594.29948, found 594.30209.

**4*R,S*-Benzyl-4-[*N*-(2''-pyridyl)methyl]carbamoyl]-1-[(2'*S*-dibenzylamino-3'-phenyl) prop-1'-yl]-2-oxoazetidine (8a,b)**

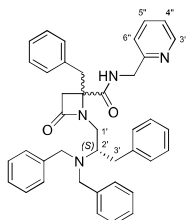

Syrup. Yield: 51% (From **3a,b** and 2-picolyamine). Eluent: 0.9% of MeOH in DCM. HPLC:  $t_R$  = 6.75 (m, **8a**) y 7.31 (M, **8b**) min (gradient from 15% to 95% of A in 10 min). Ratio of diastereoisomers M:m, 1.8:1.  $^1\text{H-NMR}$  (300 MHz,  $\text{CDCl}_3$ , major diastereoisomer **2.14b**, from the mixture):  $\delta$  8.42 (s, 1H, NH), 7.64 (td,  $J$  = 7.7, 1.8 Hz, 1H,  $\text{H}_{4''}$ ), 7.38 - 6.89 (m, 23H, Ar), 4.41 (s, 2H,  $\text{NHCH}_2$ ), 3.86 (dd,  $J$  = 13.8, 4.3 Hz, 1H,  $\text{H}_{1'}$ ), 3.78 (s, 4H,  $\text{NCH}_2$ ), 3.50 - 3.30 (m, 4H,  $\text{H}_{1'}$ ,  $\text{H}_{2'}$ ), 3.19 (d,  $J$  = 13.8 Hz, 1H, 4- $\text{CH}_2$ ), 3.12 (d,  $J$  = 14.9 Hz, 1H,  $\text{H}_3$ ), 2.98 (d,  $J$  = 14.8 Hz, 1H,  $\text{H}_3$ ), 2.84 (dd,  $J$  = 14.0, 5.8 Hz, 1H,  $\text{H}_{3'}$ ), 2.66 (d,  $J$  = 13.6 Hz, 1H, 4- $\text{CH}_2$ ).  $^{13}\text{C-NMR}$  (75 MHz,  $\text{CDCl}_3$ ):  $\delta$  170.5 (4-CONH), 166.9 ( $\text{C}_2$ ), 155.8, 149.3, 139.7, 137.2, 135.5, 130.0, 129.9, 129.8, 129.3, 129.0, 128.6, 127.6, 127.4, 126.4, 122.9, 122.3 (Ar), 64.2 ( $\text{C}_4$ ), 58.7 ( $\text{C}_{2'}$ ), 53.3 ( $\text{NCH}_2$ ), 48.6 ( $\text{C}_3$ ), 44.3 ( $\text{C}_{1'}$ ), 42.0 ( $\text{NHCH}_2$ ), 39.5 (4- $\text{CH}_2$ ), 36.5 ( $\text{C}_{3'}$ ).  $^1\text{H-NMR}$  (300 MHz,  $\text{CDCl}_3$ , minor diastereoisomer **2.14a**, from the mixture):  $\delta$  8.43 (s, 1H, NH), 7.38 - 6.89 (m, 24H, Ar), 4.42 (s, 2H,  $\text{NHCH}_2$ ), 3.80 (d,  $J$  = 13.5 Hz, 2H,  $\text{NCH}_2$ ), 3.75 (m, 1H,  $\text{H}_{1'}$ ), 3.68 (m, 3H,  $\text{NCH}_2$ ,  $\text{H}_{2'}$ ), 3.50 - 3.30 (m, 2H,  $\text{H}_{1'}$ ,  $\text{NHCH}_2$ ), 2.97 (m, 3H,  $\text{H}_{3'}$ , 4- $\text{CH}_2$ ), 2.66 (m, 1H,  $\text{H}_{3'}$ ).  $^{13}\text{C-NMR}$  (75 MHz,  $\text{CDCl}_3$ ):  $\delta$  170.5 (4-CONH), 166.7 ( $\text{C}_2$ ), 155.7, 155.5, 149.1, 139.5, 136.9, 135.2, 129.6, 129.5, 128.8, 128.7, 128.3, 127.3, 127.1, 126.2, 122.6, 121.9 (Ar), 63.7

(C<sub>4</sub>), 58.8 (C<sub>2'</sub>), 53.6 (NCH<sub>2</sub>), 48.5 (C<sub>3</sub>), 46.0 (C<sub>1'</sub>), 40.8 (NHCH<sub>2</sub>), 39.4 (4-CH<sub>2</sub>), 36.4 (C<sub>3'</sub>). MS(ES)<sup>+</sup>: 609.56 [M+H]<sup>+</sup>. Exact mass calculated for C<sub>40</sub>H<sub>40</sub>N<sub>4</sub>O<sub>2</sub>: 608.31513, found 608.31523.

**4*R,S*-Benzyl-4-[*N*-(3''-pyridyl)methyl]carbamoyl]-1-[(2'*S*-dibenzylamino-3'-phenyl)prop-1'-yl]-2-oxoazetidine (9a,b)**

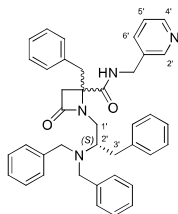

Syrup. Yield: 37% (From **3a,b** and 3-picolylamine). Eluent: 1% to 10% of EtOAc in DCM. HPLC: t<sub>R</sub> = 6.08 (m, **9a**) y 6.54 (M, **9b**) min (gradient from 15% to 95% of A in 10 min). Ratio of diastereoisomers M:m, 1.2:1. <sup>1</sup>H-NMR (300 MHz, CDCl<sub>3</sub>, major diastereoisomer **9b**, from the mixture): δ 8.51 (dd, *J* = 4.8, 1.7 Hz, 1H, H<sub>4''</sub>), 8.29 (s, 1H, H<sub>2''</sub>), 7.40 - 6.87 (m, 22H, Ar), 6.46 (t, *J* = 6.2 Hz, 1H, NH), 4.22 (dd, *J* = 14.9, 6.0 Hz, 1H, NHCH<sub>2</sub>), 4.11 (dd, *J* = 14.8, 5.5 Hz, 1H, NHCH<sub>2</sub>), 3.87 (dd, *J* = 14.4, 5.8 Hz, 1H, H<sub>1'</sub>), 3.74 (s, 4H, NCH<sub>2</sub>), 3.36 (m, 2H, H<sub>1'</sub>), 3.23 (m, 1H, H<sub>2'</sub>), 3.12 (d, *J* = 13.9 Hz, 1H, 4-CH<sub>2</sub>), 2.98 (s, 2H, H<sub>3</sub>), 2.89 (m, 1H, H<sub>3'</sub>), 2.68 (dd, *J* = 13.5, 5.1 Hz, 1H, H<sub>3'</sub>), 2.65 (d, *J* = 14.3 Hz, 4-CH<sub>2</sub>). <sup>13</sup>C-NMR (75 MHz, CDCl<sub>3</sub>): δ 170.0 (4-CONH), 166.7 (C<sub>2</sub>), 147.9, 147.7, 138.5, 138.1, 134.8, 133.9, 132.3, 128.5, 128.0, 127.8, 127.6, 127.3, 126.4, 125.2, 122.6 (Ar), 63.9 (C<sub>4</sub>), 59.5 (C<sub>2'</sub>), 53.3 (NCH<sub>2</sub>), 47.5 (C<sub>3</sub>), 42.0 (C<sub>1'</sub>), 41.3 (NHCH<sub>2</sub>), 40.2 (4-CH<sub>2</sub>), 36.1 (C<sub>3'</sub>). <sup>1</sup>H-NMR (300 MHz, CDCl<sub>3</sub>, minor diastereoisomer **9a**, from the mixture): δ 8.44 (dd, *J* = 4.8, 1.7 Hz, 1H, H<sub>4''</sub>), 8.17 (s, 1H, H<sub>2''</sub>), 7.40 - 6.87 (m, 22H, Ar), 6.46 (t, *J* = 5.6 Hz, 1H, NH), 3.76 (d, *J* = 13.3 Hz, 2H, NCH<sub>2</sub>), 3.56 (d, *J* = 13.3 Hz, 2H, NCH<sub>2</sub>), 3.36 (m, 2H, H<sub>1'</sub>), 3.38 (m, 2H, H<sub>2'</sub>, NHCH<sub>2</sub>), 3.23 (m, 3H, NHCH<sub>2</sub>, H<sub>1'</sub>), 3.00 (m, 2H, H<sub>3'</sub>, 4-CH<sub>2</sub>), 2.85 (s, 2H, H<sub>3</sub>), 2.66 (m, 1H, 4-CH<sub>2</sub>), 2.50 (dd, *J* = 13.6, 8.7 Hz, 1H, H<sub>3'</sub>). <sup>13</sup>C-NMR (75 MHz, CDCl<sub>3</sub>): δ 171.1 (4-CONH), 167.0 (C<sub>2</sub>), 147.7, 147.5, 138.6, 137.8, 134.6, 134.4, 132.5, 128.3, 128.2, 127.7, 127.6, 127.3, 126.1, 125.4, 122.5 (Ar), 64.2 (C<sub>4</sub>), 60.2 (C<sub>2'</sub>), 54.0 (NCH<sub>2</sub>), 46.6 (C<sub>3</sub>), 42.8 (C<sub>1'</sub>), 40.8 (NHCH<sub>2</sub>), 39.9 (4-CH<sub>2</sub>), 34.0 (C<sub>3'</sub>). MS(ES)<sup>+</sup>: 609.49 [M+H]<sup>+</sup>. Exact mass calculated for C<sub>40</sub>H<sub>40</sub>N<sub>4</sub>O<sub>2</sub>: 608.31513, found 608.31474.

**TableS2.** Compilation of yield and **a:b** ratio of diastereoisomeric amides **2.10ab** - **2.15ab**.

| Compound    | R | Ratio of diastereoisomers (a:b) | Yields |
|-------------|---|---------------------------------|--------|
| <b>4a,b</b> |   | 1:1.6                           | 92%    |
| <b>5a,b</b> |   | 1:2.6                           | 38%    |
| <b>6a,b</b> |   | 1:1.3                           | 61%    |
| <b>7a,b</b> |   | 1:1.4                           | 85%    |
| <b>8a,b</b> |   | 1:1.8                           | 51%    |
| <b>9a,b</b> |   | 1:1.2                           | 37%    |

**4*R,S*-Benzyl-4-methoxycarbonyl-1-[(2'*S*-amino-3'-phenyl)prop-1'-yl]-2-oxoazetidine hydrochloride (10a,b)**

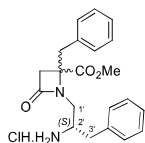

White solid. Yield: 89% (From **2a,b**). Eluent: 2% to 9% of MeOH in DCM. HPLC:  $t_R$  = 4.63 min (gradient from 15% to 95% of A in 10 min). Ratio of diastereoisomers M:m, 2.5:1.  $^1\text{H-NMR}$  (300 MHz,  $\text{CDCl}_3$ , major diastereoisomer **10b**, from the mixture):  $\delta$  7.38 - 6.94 (m, 20H, Ar), 3.72 (s, 3H,  $\text{OCH}_3$ ), 3.37 (m, 1H,  $\text{H}_2'$ ), 3.35 (d,  $J$  = 13.8 Hz, 1H, 4- $\text{CH}_2$ ), 3.28 - 3.14 (m, 3H,  $\text{H}_1'$ ,  $\text{H}_3$ ), 3.13 (d,  $J$  = 13.8 Hz, 1H, 4- $\text{CH}_2$ ), 2.92 (d,  $J$  = 14.8 Hz, 1H,  $\text{H}_3$ ), 2.75 (dd,  $J$  = 13.5, 5.3 Hz, 1H,  $\text{H}_3'$ ), 2.54 (dd,  $J$  = 13.5, 8.2 Hz, 1H,  $\text{H}_3'$ ), 2.36 (s ancho, 3H,  $\text{NH}_3^+$ ).  $^{13}\text{C-NMR}$  (75 MHz,  $\text{CDCl}_3$ ):  $\delta$  172.0 (COO), 167.0 ( $\text{C}_2$ ), 138.6, 134.6, 129.8, 129.4, 128.9, 128.7, 127.6, 126.7 (Ar), 62.8 ( $\text{C}_4$ ), 52.8 ( $\text{OCH}_3$ ), 51.6 ( $\text{C}_2'$ ), 49.5 ( $\text{C}_1'$ ), 45.61 ( $\text{C}_3$ ), 42.2 ( $\text{C}_3'$ ), 39.5 (4- $\text{CH}_2$ ).  $^1\text{H-NMR}$  (300 MHz,  $\text{CDCl}_3$ , minor diastereoisomer **10a**, from the mixture):  $\delta$  7.38 - 6.97 (m, 10H, Ar), 3.72 (s, 3H,  $\text{OCH}_3$ ), 3.40 - 3.33 (m, 1H,  $\text{H}_2'$ ), 3.28 - 3.14 (m, 3H,  $\text{H}_1'$ ,  $\text{H}_3$ ), 2.92 (d,  $J$  = 14.8 Hz, 1H,  $\text{H}_3$ ), 2.56 - 2.52 (m, 2H,  $\text{H}_3'$ , 4- $\text{CH}_2$ ), 2.08 (d,  $J$  = 13.9 Hz, 1H, 4- $\text{CH}_2$ ), 2.05 (dd,  $J$  = 11.4, 2.6 Hz, 1H,  $\text{H}_3'$ ), 2.36 (s ancho, 3H,  $\text{NH}_3^+$ ).  $^{13}\text{C-NMR}$  (75 MHz,  $\text{CDCl}_3$ ):  $\delta$  171.3 (COO), 169.5 ( $\text{C}_2$ ), 135.6, 135.5, 130.2, 129.0, 129.1, 129.1, 127.7, 127.3 (Ar), 65.7 ( $\text{C}_4$ ), 52.8 ( $\text{OCH}_3$ ), 51.0 ( $\text{C}_2'$ ), 48.6 ( $\text{C}_1'$ ), 45.61 ( $\text{C}_3$ ), 41.9 ( $\text{C}_3'$ ), 40.2 (4- $\text{CH}_2$ ). MS(ES) $^+$ : 353.18 [ $\text{M}+\text{H}$ ] $^+$ , 705.57 [ $2\text{M}+\text{H}$ ] $^+$ .

**(3*S*,6*S*)-3,6-Dibenzyl-1,4-diazabicyclo[4.2.0]octane-5,8-dione (11a)**

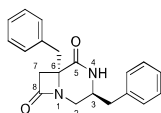

Syrup. Yield: 10% (From **2a,b**). HPLC:  $t_R$  = 7.23 min (gradient from 15% to 95% of A in 10 min).  $^1\text{H-NMR}$  (400 MHz,  $\text{CDCl}_3$ ):  $\delta$  7.74 - 6.65 (m, 10H, Ar), 5.68 (s ancho, 1H, NH), 3.85 (m, 1H,  $\text{H}_3$ ), 3.70 (dt,  $J$  = 14.1, 4.9 Hz, 1H,  $\text{H}_7$ ), 3.59 (dd,  $J$  = 13.4, 4.5 Hz, 1H, 3- $\text{CH}_2$ ), 3.15 (dd,  $J$  = 15.6, 4.7 Hz, 1H,  $\text{H}_2$ ), 3.09 (dd,  $J$  = 15.8, 4.6 Hz, 1H,  $\text{H}_2$ ), 2.92 (dd,  $J$  = 13.4, 4.4 Hz, 1H, 3- $\text{CH}_2$ ), 2.55 (dt,  $J$  = 13.7, 4.7 Hz, 1H, 6- $\text{CH}_2$ ), 2.07 (m, 2H, 6- $\text{CH}_2$ ,  $\text{H}_7$ ).  $^{13}\text{C-NMR}$  (75 MHz,  $\text{CDCl}_3$ ):  $\delta$  171.3 ( $\text{C}_5$ ), 169.5 ( $\text{C}_8$ ), 135.5, 134.7, 130.2, 129.4, 129.1, 128.7, 127.7, 127.6 (Ar), 57.9 ( $\text{C}_6$ ), 54.1 ( $\text{C}_3$ ), 48.6 ( $\text{C}_2$ ), 42.0 ( $\text{C}_7$ ), 41.9 (3- $\text{CH}_2$ ), 40.3 (6- $\text{CH}_2$ ). MS(ES) $^+$ : 321.21 [ $\text{M}+\text{H}$ ] $^+$  y 641.49 [ $2\text{M}+\text{H}$ ] $^+$ . Exact mass calculated for  $\text{C}_{20}\text{H}_{20}\text{N}_2\text{O}_2$ : 320.15248, found 320.15349.

**4*R,S*-Benzyl-4-[*N*-(*iso*-butyl)carbamoyl]-1-[(2'*S*-amino-3'-phenyl)prop-1'-yl]-2-oxoazetidine hydrochloride (12a,b)**

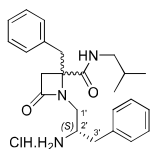

White solid. Yield: 97% (From **4a,b**). HPLC:  $t_R$  = 5.18 (m, **12b**) y 5.32 (M, **12a**) min (gradient from 15% to 95% of A in 10 min). Ratio of diastereoisomers M:m, 1.7:1.  $^1\text{H-NMR}$  (300 MHz,  $\text{CDCl}_3$ , major diastereoisomer **12b**, from the mixture):  $\delta$  8.39 (t,  $J$  = 5.7 Hz, 1H, 4-CONH), 8.23 (s, 3H,  $\text{NH}_3^+$ ), 7.39 - 7.16 (m, 10H), 3.71 (s ancho, 1H,  $\text{H}_2'$ ), 3.50 (dd,  $J$  = 15.1, 8.6 Hz, 1H,  $\text{H}_1'$ ), 3.41 (d,  $J$  = 14.2 Hz, 1H, 4- $\text{CH}_2$ ), 3.36 (m, 1H,  $\text{H}_1'$ ), 3.23 (d,  $J$  = 14.1 Hz, 1H, 4- $\text{CH}_2$ ), 3.16 (d,  $J$  = 14.7 Hz, 1H,

H<sub>3</sub>), 3.07 (d, *J* = 15.1 Hz, 1H, H<sub>3</sub>), 3.00 - 2.80 (m, 4H, CH<sub>2</sub>, <sup>i</sup>Bu, H<sub>3</sub>'), 1.73 (m, 1H, CH, <sup>i</sup>Bu), 0.80 (d, *J* = 6.6 Hz, 3H, CH<sub>3</sub>, <sup>i</sup>Bu), 0.77 (d, *J* = 6.7 Hz, CH<sub>3</sub>, <sup>i</sup>Bu). <sup>13</sup>C-NMR (101 MHz, DMSO-*d*<sub>6</sub>): δ 171.2 (4-CONH), 167.8 (C<sub>2</sub>), 136.6, 135.6, 130.5, 130.4, 129.8, 129.2, 128.8, 127.4 (Ar), 64.7 (C<sub>4</sub>), 51.6, (C<sub>2</sub>'), 47.1 (CH<sub>2</sub>, <sup>i</sup>Bu), 45.6 (C<sub>3</sub>), 42.4 (C<sub>1</sub>'), 39.0 (4-CH<sub>2</sub>), 36.7 (C<sub>3</sub>'), 28.2 (CH, <sup>i</sup>Bu), 20.7 (CH<sub>3</sub>, <sup>i</sup>Bu). <sup>1</sup>H-NMR (300 MHz, CDCl<sub>3</sub>, minor diastereoisomer **12a**, from the mixture): δ 8.51 (t, *J* = 5.8 Hz, 1H, 4-CONH), 8.33 (s, 3H, NH<sub>3</sub><sup>+</sup>), 7.39 - 7.16 (m, 10H, Ar), 3.64 (s ancho, 1H, H<sub>2</sub>'), 3.42 (m, 2H, H<sub>1</sub>'), 3.41 (d, *J* = 14.2 Hz, 1H, 4-CH<sub>2</sub>), 3.23 (d, *J* = 14.1 Hz, 1H, 4-CH<sub>2</sub>), 3.16 (d, *J* = 14.7 Hz, 1H, H<sub>3</sub>), 3.07 (d, *J* = 15.1 Hz, 1H, H<sub>3</sub>), 3.00 - 2.80 (m, 4H, CH<sub>2</sub>, <sup>i</sup>Bu, H<sub>3</sub>'), 1.73 (m, 1H, CH, <sup>i</sup>Bu), 0.82 (d, *J* = 7.4 Hz, 6H, CH<sub>3</sub>, <sup>i</sup>Bu). <sup>13</sup>C-NMR (101 MHz, DMSO-*d*<sub>6</sub>): δ 172.3 (4-CONH), 167.2 (C<sub>2</sub>), 136.6, 135.5, 130.5, 130.4, 129.7, 129.2, 128.8, 127.5 (Ar), 64.2 (C<sub>4</sub>), 51.8 (C<sub>2</sub>'), 47.1 (CH<sub>2</sub>, <sup>i</sup>Bu), 45.6 (C<sub>3</sub>), 43.3 (C<sub>1</sub>'), 38.9 (4-CH<sub>2</sub>), 36.9 (C<sub>3</sub>'), 28.2 (CH, <sup>i</sup>Bu), 20.7 (CH<sub>3</sub>, <sup>i</sup>Bu). MS(ES)<sup>+</sup>: 394.11 [M+H]<sup>+</sup>.

**4*R,S*-Benzyl-4-methoxycarbonyl-1-[(2'*S*-benzylamino-3'-phenyl)prop-1'-yl]-2-oxoazetidine (13a,b)**

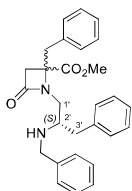

Syrup. Yield: 40% (From **10a,b** and benzaldehyde). Eluent: 14% to 33% of EtOAc in Hexane . HPLC: t<sub>R</sub> = 5.61 (M, **13b**) y 5.82 (m, **13a**) min (gradient from 15% to 95% of A in 10 min). Ratio of diastereoisomers M:m, 3.6:1. <sup>1</sup>H-NMR (400 MHz, CDCl<sub>3</sub>, major diastereoisomer): δ 7.45 - 6.95 (m, 15H, Ar), 5.60 (s, 1H, NH), 3.83 (d, *J* = 13.5 Hz, 1H, NHCH<sub>2</sub>), 3.77 (d, *J* = 13.3 Hz, 1H, NHCH<sub>2</sub>), 3.55 (s, 3H, OCH<sub>3</sub>), 3.38 (dd, *J* = 14.0, 6.7 Hz, 1H, H<sub>1</sub>'), 3.28 (d, *J* = 13.8 Hz, 1H, 4-CH<sub>2</sub>), 3.20 (d, *J* = 14.9 Hz, 1H, H<sub>3</sub>), 3.13 (m, 2H, H<sub>1</sub>', H<sub>2</sub>'), 3.01 (d, *J* = 14.0 Hz, 1H, 4-CH<sub>2</sub>), 2.89 (d, *J* = 14.9 Hz, 1H, H<sub>3</sub>), 2.80 (m, 2H, H<sub>3</sub>'). <sup>13</sup>C-NMR (75 MHz, CDCl<sub>3</sub>, major diastereoisomer): δ 171.4 (COO), 167.3 (C<sub>2</sub>), 140.3, 138.7, 138.1, 129.7, 129.4, 129.0, 128.8, 128.6, 128.4, 127.8, 127.5, 126.6 (Ar), 63.0 (C<sub>4</sub>), 57.7 (C<sub>2</sub>'), 52.5 (OCH<sub>3</sub>), 51.4 (NHCH<sub>2</sub>), 45.8 (C<sub>1</sub>'), 45.3 (C<sub>3</sub>), 39.8 (4-CH<sub>2</sub>), 39.0 (C<sub>3</sub>'). MS(ES)<sup>+</sup>: 443.34 [M+H]<sup>+</sup>. Exact mass calculated for C<sub>28</sub>H<sub>30</sub>N<sub>2</sub>O<sub>3</sub>: 442.2256, found 442.2265.

**4*R,S*-Benzyl-4-methoxycarbonyl-1-[(2'*S*-(3''-methylbenzyl)amino-3'-phenyl)prop-1'-yl]-2-oxoazetidine (14a,b)**

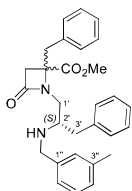

Syrup. Yield: 30% (From **10a,b** and *m*-tolualdehyde). Eluent: 5% to 100% of EtOAc in DCM. HPLC: t<sub>R</sub> = 6.13 (M, **14b**) y 7.27 (m, **14a**) min (gradient from 15% to 95% of A in 10 min). Ratio of diastereoisomers M:m, 3.6:1. <sup>1</sup>H-NMR (400 MHz, CDCl<sub>3</sub>, major diastereoisomer): δ 7.45 - 6.80 (m, 14H, Ar), 3.75 (s, 2H, NHCH<sub>2</sub>), 3.57 (s, 3H, OCH<sub>3</sub>), 3.37 (dd, *J* = 14.2, 6.7 Hz, 1H, H<sub>1</sub>'), 3.31 (d, *J* = 14.0 Hz, 1H, 4-CH<sub>2</sub>), 3.22 (d, *J* = 15.0 Hz, 1H, H<sub>3</sub>), 3.20 (m, 1H, H<sub>1</sub>'), 3.12 (m, 1H, H<sub>2</sub>'), 3.00 (d, *J* = 13.9 Hz, 1H, 4-CH<sub>2</sub>), 2.90 (d, *J* = 14.8 Hz, 1H, H<sub>3</sub>), 2.78 (m, 2H, H<sub>3</sub>'), 2.30 (s, 3H, 3''-CH<sub>3</sub>), 1.94 (s, 1H, NH). <sup>13</sup>C-NMR (75 MHz, CDCl<sub>3</sub>, major diastereoisomer): δ 171.4 (COO), 167.2 (C<sub>2</sub>), 140.3, 138.7, 138.1, 134.7, 129.7, 129.4, 129.0, 128.8, 128.6, 128.4, 127.8, 127.5, 126.5, 125.3 (Ar), 63.0 (C<sub>4</sub>), 57.6 (C<sub>2</sub>'), 52.51 (OCH<sub>3</sub>), 51.4 (NHCH<sub>2</sub>), 45.8 (C<sub>1</sub>'), 45.3 (C<sub>3</sub>), 39.8 (4-CH<sub>2</sub>), 39.4 (C<sub>3</sub>'), 21.5 (3''-CH<sub>3</sub>).

CH<sub>3</sub>). MS(ES)<sup>+</sup>: 457.16 [M+H]<sup>+</sup>. Exact mass calculated for C<sub>29</sub>H<sub>32</sub>N<sub>2</sub>O<sub>3</sub>: 456.24129, found 456.24161.

**4*R,S*-Benzyl-4-methoxycarbonyl-1-[(2'*S*-(4''-methylbenzyl)amino-3'-phenyl)prop-1'-yl]-2-oxoazetidine (15a,b)**

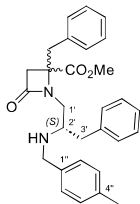

Syrup. Yield: 30% (From **2.16ab** and p-tolualdehyde). Eluent: 17% to 100% of EtOAc in DCM. HPLC: t<sub>R</sub> = 5.40 (M, **15b**) y 6.50 (m, **15a**) min (gradient from 20% to 95% of A in 10 min). Ratio of diastereoisomers M:m, 5.6:1. <sup>1</sup>H-NMR (400 MHz, CDCl<sub>3</sub>, major diastereoisomer): δ 7.35 - 6.92 (m, 14H, Ar), 3.75 (d, *J* = 13.1 Hz, 1H, NHCH<sub>2</sub>), 3.72 (d, *J* = 13.2 Hz, 1H, NHCH<sub>2</sub>), 3.55 (s, 3H, OCH<sub>3</sub>), 3.33 (dd, *J* = 14.2, 6.7 Hz, 1H, H<sub>1'</sub>), 3.30 (d, *J* = 14.0 Hz, 1H, 4-CH<sub>2</sub>), 3.21 (d, *J* = 15.0 Hz, 1H, H<sub>3</sub>), 3.19 (m, 1H, H<sub>2'</sub>), 3.11 (m, 1H, H<sub>1'</sub>), 3.00 (d, *J* = 13.9 Hz, 1H, 4-CH<sub>2</sub>), 2.89 (dd, *J* = 14.3, 4.3 Hz, 1H, H<sub>1'</sub>), 2.89 (d, *J* = 14.8 Hz, 1H, H<sub>3</sub>), 2.78 (m, 2H, H<sub>3'</sub>), 2.30 (s, 3H, 4''-CH<sub>3</sub>), 2.17 (s, 1H, NH). <sup>13</sup>C-NMR (75 MHz, CDCl<sub>3</sub>, major diastereoisomer): δ 171.4 (COO), 167.2 (C<sub>2</sub>), 138.7, 137.2, 136.5, 134.7, 129.7, 129.4, 129.1, 128.8, 128.6, 128.2, 127.5, 126.5 (Ar), 62.7 (C<sub>4</sub>), 57.6 (C<sub>2'</sub>), 52.5 (OCH<sub>3</sub>), 51.2 (NHCH<sub>2</sub>), 45.8 (C<sub>1'</sub>), 45.3 (C<sub>3</sub>), 39.7 (4-CH<sub>2</sub>), 39.4 (C<sub>3'</sub>), 21.2 (4''-CH<sub>3</sub>). MS(ES)<sup>+</sup>: 457.16 [M+H]<sup>+</sup>. Exact mass calculated for C<sub>29</sub>H<sub>32</sub>N<sub>2</sub>O<sub>3</sub>: 456.24129, found 456.24234.

**4*R,S*-Benzyl-4-methoxycarbonyl-1-[(2'*S*-(3''-bromobenzyl)amino-3'-phenyl)prop-1'-yl]-2-oxoazetidine (16a,b)**

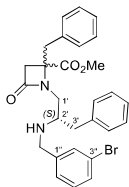

Syrup. Yield: 40% (From **10a,b** and 3-bromobenzaldehyde). Eluent: 17% to 100% of EtOAc in DCM. HPLC: t<sub>R</sub> = 6.83 (M, **16b**) y 7.82 (m, **16a**) min (gradient from 10% to 95% of A in 10 min). Ratio of diastereoisomers M:m, 2:1. <sup>1</sup>H-NMR (400 MHz, CDCl<sub>3</sub>, major diastereoisomer, from the mixture): δ 7.43 - 6.93 (m, 14H, Ar), 3.76 (d, *J* = 13.7 Hz, 1H, NHCH<sub>2</sub>), 3.71 (d, *J* = 13.8 Hz, 1H, NHCH<sub>2</sub>), 3.58 (s, 3H, OCH<sub>3</sub>), 3.34 (dd, *J* = 14.2, 7.1 Hz, 1H, H<sub>1'</sub>), 3.28 (d, *J* = 14.0 Hz, 1H, 4-CH<sub>2</sub>), 3.24 (m, 1H, H<sub>1'</sub>), 3.16 (d, *J* = 15.1 Hz, 1H, H<sub>3</sub>), 3.16 (m, 1H, H<sub>2'</sub>), 3.02 (d, *J* = 13.9 Hz, 1H, 4-CH<sub>2</sub>), 2.91 (d, *J* = 14.8 Hz, 1H, H<sub>3</sub>), 2.76 (m, 2H, H<sub>3'</sub>) 1.87 (s, 1H, NH). <sup>13</sup>C-NMR (75 MHz, CDCl<sub>3</sub>, major diastereoisomer): δ 171.5 (COO), 167.2 (C<sub>2</sub>), 143.0, 138.6, 134.5, 131.3, 130.1, 130.0, 129.7, 129.4, 128.9, 128.7, 127.6, 126.8, 126.6, 122.6 (Ar), 63.0 (C<sub>4</sub>), 57.6 (C<sub>2'</sub>), 52.6 (OCH<sub>3</sub>), 50.7 (NHCH<sub>2</sub>), 45.9 (C<sub>1'</sub>), 45.4 (C<sub>3</sub>), 39.8 (4-CH<sub>2</sub>), 39.5 (C<sub>3'</sub>). MS(ES)<sup>+</sup>: 521.30 [M+H]<sup>+</sup>. Exact mass calculated for C<sub>28</sub>H<sub>29</sub>BrN<sub>2</sub>O<sub>3</sub>: 520.13616, found 520.13646. <sup>1</sup>H-NMR (400 MHz, CDCl<sub>3</sub>, minor diastereoisomer, from the mixture): δ 7.39 - 6.95 (m, 14H, Ar), 3.78-3.68 (m, 2H, NHCH<sub>2</sub>), 3.63 (s, 3H, OCH<sub>3</sub>), 3.38 (m, 1H, H<sub>1'</sub>), 3.26-2.68 (m, 8H, 4-CH<sub>2</sub>, H<sub>1'</sub>, H<sub>3</sub>, H<sub>2'</sub>, H<sub>3</sub>), 2.53 (m, 2H, H<sub>3'</sub>) 1.87 (s, 1H, NH). <sup>13</sup>C-RMN (75 MHz, CDCl<sub>3</sub>: δ 171.6 (COO), 167.1 (C<sub>2</sub>), 143.1, 138.6, 134.7, 131.3, 130.1, 130.0, 129.7, 129.4, 129.0, 128.6, 127.6, 126.9, 126.7, 122.6 (Ar), 63.1 (C<sub>4</sub>), 57.4 (C<sub>2'</sub>), 52.6 (OCH<sub>3</sub>), 50.8 (NHCH<sub>2</sub>), 46.1 (C<sub>1'</sub>), 45.6 (C<sub>3</sub>), 39.9 (4-CH<sub>2</sub>), 39.6 (C<sub>3'</sub>) .

**4*R,S*-Benzyl-4-methoxycarbonyl-1-[(2'*S*-naphthylmethylamino-3'-phenyl)prop-1'-yl]-2-oxoazetidine (17a,b)**

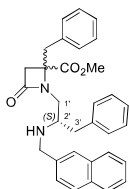

Syrup. Yield: 45% (From **10a,b** and 2-naphthaldehyde). Eluent: 1% to 10% of MeOH in DCM. HPLC:  $t_R$  = 6.47 (M, **17b**) y 7.21 (m, **17a**) min (gradient from 15% to 95% of A in 10 min). Ratio of diastereoisomers M:m, 4:1.  $^1\text{H-NMR}$  (400 MHz,  $\text{CDCl}_3$ , major diastereoisomer):  $\delta$  7.92 - 6.78 (m, 17H, Ar), 3.97 (d,  $J$  = 13.6 Hz, 1H,  $\text{NHCH}_2$ ), 3.91 (d,  $J$  = 13.7 Hz, 1H,  $\text{NHCH}_2$ ), 3.44 (s, 3H,  $\text{OCH}_3$ ), 3.39 (dd,  $J$  = 13.9, 6.6 Hz, 1H,  $\text{H}_{1'}$ ), 3.27 (d,  $J$  = 13.9 Hz, 1H, 4- $\text{CH}_2$ ), 3.25 (m, 1H,  $\text{H}_{1'}$ ), 3.21 (d,  $J$  = 14.7 Hz, 1H,  $\text{H}_3$ ), 3.15 (m, 1H,  $\text{H}_{2'}$ ), 2.98 (d,  $J$  = 14.0 Hz, 1H, 4- $\text{CH}_2$ ), 2.89 (d,  $J$  = 14.8 Hz, 1H,  $\text{H}_3$ ), 2.80 (m, 2H,  $\text{H}_{3'}$ ), 1.78 (s, 1H, NH).  $^{13}\text{C-NMR}$  (75 MHz,  $\text{CDCl}_3$ , major diastereoisomer):  $\delta$  171.4 (COO), 167.3 ( $\text{C}_2$ ), 138.8, 134.6, 132.8, 130.5, 129.7, 129.4, 128.8, 128.7, 128.7, 128.1, 127.8, 127.7, 127.5, 126.7, 126.6, 126.6, 126.1, 125.6 (Ar), 63.0 ( $\text{C}_4$ ), 57.6 ( $\text{C}_{2'}$ ), 52.4 ( $\text{OCH}_3$ ), 51.5 ( $\text{NHCH}_2$ ), 45.9 ( $\text{C}_{1'}$ ), 45.3 ( $\text{C}_3$ ), 39.8 (4- $\text{CH}_2$ ), 39.5 ( $\text{C}_{3'}$ ). MS(ES) $^+$ : 493.44 [ $\text{M}+\text{H}$ ] $^+$ . Exact mass calculated for  $\text{C}_{32}\text{H}_{32}\text{N}_2\text{O}_3$ : 492.24129, found 492.24262.

**4*R,S*-Benzyl-4-methoxycarbonyl-1-[(2'*S*-(4''-propoxybenzyl)amino-3'-phenyl) prop-1'-yl]-2-oxoazetidine (18a,b)**

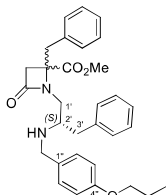

Syrup. Yield: 36% (From **10a,b** and 4-propoxybenzaldehyde). Eluent: 17% to 100% of EtOAc in DCM. HPLC:  $t_R$  = 6.07 (M, **18b**) y 6.54 (m, **19a**) min (gradient from 20% to 95% of A in 10 min). Ratio of diastereoisomers M:m, 9.5:1.  $^1\text{H-NMR}$  (400 MHz,  $\text{CDCl}_3$ , major diastereoisomer):  $\delta$  7.39 - 6.66 (m, 14H, Ar), 3.88 (t,  $J$  = 6.6 Hz, 2H,  $\text{OCH}_2$ , Pr), 3.73 (d,  $J$  = 13.3 Hz, 1H,  $\text{NHCH}_2$ ), 3.69 (d,  $J$  = 13.4 Hz, 1H,  $\text{NHCH}_2$ ), 3.57 (s, 3H,  $\text{OCH}_3$ ), 3.36 (dd,  $J$  = 14.0, 6.7 Hz, 1H,  $\text{H}_{1'}$ ), 3.30 (d,  $J$  = 13.9 Hz, 1H, 4- $\text{CH}_2$ ), 3.21 (d,  $J$  = 15.0 Hz, 1H,  $\text{H}_3$ ), 3.20 (m, 1H,  $\text{H}_{1'}$ ), 3.13 (m, 1H,  $\text{H}_{2'}$ ), 3.00 (d,  $J$  = 14.0 Hz, 1H, 4- $\text{CH}_2$ ), 2.89 (d,  $J$  = 14.8 Hz, 1H,  $\text{H}_3$ ), 2.77 (m, 2H,  $\text{H}_{3'}$ ), 1.88 (s, 1H, NH), 1.77 (m, 2H,  $\text{CH}_2$ , Pr), 1.02 (t,  $J$  = 7.4 Hz, 3H,  $\text{CH}_3$ , Pr).  $^{13}\text{C-NMR}$  (75 MHz,  $\text{CDCl}_3$ , major diastereoisomer):  $\delta$  171.5 (COO), 167.2 ( $\text{C}_2$ ), 158.3, 138.8, 134.7, 132.2, 129.7, 129.4, 129.4, 128.8, 128.6, 127.5, 126.5, 114.5 (Ar), 69.7 ( $\text{OCH}_2$ , Pr), 63.0 ( $\text{C}_4$ ), 57.6 ( $\text{C}_{2'}$ ), 52.5 ( $\text{OCH}_3$ ), 50.9 ( $\text{NHCH}_2$ ), 45.9 ( $\text{C}_{1'}$ ), 45.3 ( $\text{C}_3$ ), 39.8 (4- $\text{CH}_2$ ), 39.4 ( $\text{C}_{3'}$ ), 22.7 ( $\text{CH}_2$ , Pr), 10.7 ( $\text{CH}_3$ , Pr). MS(ES) $^+$ : 501.32 [ $\text{M}+\text{H}$ ] $^+$ . Exact mass calculated for  $\text{C}_{31}\text{H}_{36}\text{N}_2\text{O}_4$ : 500.26751, found 500.26864.

**4*R,S*-Benzyl-4-[*N*-(iso-butyl)carbamoyl]-1-[(2'*S*-(3''-methylbenzyl)amino-3'-phenyl)prop-1'-yl]-2-oxoazetidine (19a,b)**

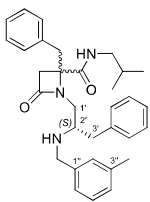

Syrup. Yield: 28% (From **12a,b** and 3-tolualdehyde). Eluent: 6% to 50% of EtOAc in DCM. HPLC:  $t_R$  = 6.49 (m, **19a**) y 6.77 (M, **19b**) min (gradient from 15% to 95% of A in 10 min). Ratio of diastereoisomers M:m, 1.5:1.  $^1\text{H-NMR}$  (300 MHz,  $\text{CDCl}_3$ , major diastereoisomer **19b**, from the mixture):  $\delta$  10.14 (s, 1H, 4-CONH), 7.36 - 6.54 (m, 15H, Ar, 2'-NH), 3.94 (d,  $J$  = 14.4 Hz, 1H, 4- $\text{CH}_2$ ), 3.61 (dd,  $J$  = 15.0, 6.3 Hz, 1H,  $\text{H}_{1'}$ ), 3.41 (d,  $J$  = 12.8 Hz, 1H,  $\text{NHCH}_2$ ), 3.34 (d,  $J$  = 12.8 Hz, 1H,  $\text{NHCH}_2$ ), 3.16 - 2.95 (m, 5H,  $\text{CH}_2$ ,  $^i\text{Bu}$ ,  $\text{H}_{1'}$ ,  $\text{H}_3$ , 4- $\text{CH}_2$ ), 2.65 (m, 2H,  $\text{H}_{2'}$ ,  $\text{H}_{3'}$ ), 2.61 - 2.49 (m, 2H,  $\text{H}_{3'}$ ,  $\text{CH}_2$ ,  $^i\text{Bu}$ ), 2.24 (s, 3H, 3''- $\text{CH}_3$ ), 1.57 (m, 1H, CH,  $^i\text{Bu}$ ), 0.75 (d,  $J$  = 6.2 Hz, 3H,  $\text{CH}_3$ ,  $^i\text{Bu}$ ), 0.73 (d,  $J$  = 6.3 Hz, 3H,  $\text{CH}_3$ ,  $^i\text{Bu}$ ).  $^{13}\text{C-NMR}$  (75 MHz,  $\text{CDCl}_3$ ):  $\delta$  172.6 (4-CONH), 169.5 ( $\text{C}_2$ ), 138.3, 137.9, 136.2, 130.2, 129.5, 129.1, 128.9, 128.7, 128.6, 128.2, 127.4, 126.9, 125.1 (Ar), 65.2 ( $\text{C}_4$ ), 56.4 ( $\text{C}_2'$ ), 50.1 ( $\text{C}_3$ ), 48.1 ( $\text{NHCH}_2$ ), 46.9 ( $\text{CH}_2$ ,  $^i\text{Bu}$ ), 43.2 ( $\text{C}_{1'}$ ), 40.5 (4- $\text{CH}_2$ ), 38.4 ( $\text{C}_{3'}$ ), 27.8 (CH,  $^i\text{Bu}$ ), 21.4 (3''- $\text{CH}_3$ ), 20.3, 20.2 ( $\text{CH}_3$ ,  $^i\text{Bu}$ ).  $^1\text{H-NMR}$  (300 MHz,  $\text{CDCl}_3$ , minor diastereoisomer **19a**, from the mixture):  $\delta$  9.63 (s, 1H, 4-CONH), 7.36 - 6.54 (m, 15H, Ar, 2'-NH), 3.87 (d,  $J$  = 13.9 Hz, 1H, 4- $\text{CH}_2$ ), 3.79 (m, 1H,  $\text{H}_{2'}$ ), 3.70 (d,  $J$  = 11.8 Hz, 1H,  $\text{NHCH}_2$ ), 3.56 (d,  $J$  = 11.9 Hz, 1H,  $\text{NHCH}_2$ ), 3.16 - 2.95 (m, 5H,  $\text{H}_{1'}$ ,  $\text{H}_3$ ,  $\text{CH}_2$ ,  $^i\text{Bu}$ , 4- $\text{CH}_2$ ), 2.65 (m, 1H,  $\text{H}_{3'}$ ), 2.52 (m, 1H,  $\text{H}_{3'}$ ), 2.30 (s, 3H, 3''- $\text{CH}_3$ ), 2.05 - 1.87 (m, 2H,  $\text{CH}_2$ ,  $^i\text{Bu}$ ,  $\text{H}_{1'}$ ), 1.24 (m, 1H, CH,  $^i\text{Bu}$ ), 0.49 (d,  $J$  = 6.6 Hz, 3H,  $\text{CH}_3$ ,  $^i\text{Bu}$ ), 0.35 (d,  $J$  = 6.6 Hz, 3H,  $\text{CH}_3$ ,  $^i\text{Bu}$ ).  $^{13}\text{C-NMR}$  (75 MHz,  $\text{CDCl}_3$ ):  $\delta$  171.5 (4-CONH), 167.7 ( $\text{C}_2$ ), 139.0, 138.5, 136.6, 136.4, 130.3, 129.5, 128.9, 128.8, 128.5, 128.4, 127.2, 127.1, 125.7 (Ar), 64.3 ( $\text{C}_4$ ), 55.1 ( $\text{C}_2'$ ), 53.1 ( $\text{NHCH}_2$ ), 49.9 ( $\text{CH}_2$ ,  $^i\text{Bu}$ ), 49.6 ( $\text{C}_3$ ), 46.4 ( $\text{C}_{1'}$ ), 41.1 (4- $\text{CH}_2$ ), 40.5 ( $\text{C}_{3'}$ ), 27.8 (CH,  $^i\text{Bu}$ ), 21.4 (3''- $\text{CH}_3$ ), 20.0, 19.9 ( $\text{CH}_3$ ,  $^i\text{Bu}$ ). MS(ES) $^+$ : 498.34  $[\text{M}+\text{H}]^+$ . Exact mass calculated for  $\text{C}_{32}\text{H}_{39}\text{N}_3\text{O}_2$ : 497.30423, found 497.30343.

**4R,S-Benzyl-4-[N-(iso-butyl)carbamoyl]-1-[(2'S-(3''-biphenyl)methylamino-3'-phenyl)prop-1'-yl]-2-oxoazetidine (**20a,b**)**

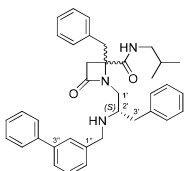

Syrup. Yield: 80% (From **12a,b** and biphenyl-3-carboxaldehyde). Eluent: 6% to 20% of EtOAc in DCM. HPLC:  $t_R$  = 7.16 (m, **20a**) y 7.42 (M, **20b**) min (gradient from 15% to 95% of A in 10 min). Ratio of diastereoisomers M:m, 1.1:1.  $^1\text{H-NMR}$  (300 MHz,  $\text{CDCl}_3$ , major diastereoisomer **20b**, from the mixture):  $\delta$  10.11 (t,  $J$  = 5.8 Hz, 1H, 4-CONH), 7.57 - 6.74 (m, 20H, Ar, 2'-NH), 3.97 (d,  $J$  = 14.3 Hz, 1H, 4- $\text{CH}_2$ ), 3.65 (dd,  $J$  = 14.9, 6.2 Hz, 1H,  $\text{H}_{1'}$ ), 3.44 (d,  $J$  = 12.8 Hz, 1H,  $\text{NHCH}_2$ ), 3.38 (d,  $J$  = 12.8 Hz, 1H,  $\text{NHCH}_2$ ), 3.20 - 2.98 (m, 5H,  $\text{CH}_2$ ,  $^i\text{Bu}$ ,  $\text{H}_{1'}$ ,  $2\text{H}_3$ , 4- $\text{CH}_2$ ), 2.83 - 2.67 (m, 2H,  $\text{H}_{3'}$ ,  $\text{H}_{2'}$ ), 2.65 - 2.50 (m, 2H,  $\text{CH}_2$ ,  $^i\text{Bu}$ ,  $\text{H}_{3'}$ ), 1.25 (m, 1H, CH,  $^i\text{Bu}$ ), 0.46 (d,  $J$  = 6.7 Hz, 3H,  $\text{CH}_3$ ,  $^i\text{Bu}$ ), 0.33 (d,  $J$  = 6.6 Hz, 3H,  $\text{CH}_3$ ,  $^i\text{Bu}$ ).  $^{13}\text{C-NMR}$  (75 MHz,  $\text{CDCl}_3$ ):  $\delta$  172.5 (4-CONH), 169.4 ( $\text{C}_2$ ), 141.7, 140.7, 138.9, 137.8, 136.1, 130.1, 129.1, 129.0, 128.8, 128.6, 127.5, 127.2, 127.1, 126.9, 126.8, 126.3 (Ar), 65.2 ( $\text{C}_4$ ), 56.4 ( $\text{C}_2'$ ), 50.1 ( $\text{C}_3$ ), 48.1 ( $\text{NHCH}_2$ ), 46.9 ( $\text{CH}_2$ ,  $^i\text{Bu}$ ), 43.1 ( $\text{C}_{1'}$ ), 40.5 (4- $\text{CH}_2$ ), 38.3 ( $\text{C}_{3'}$ ), 28.2 (CH,  $^i\text{Bu}$ ), 20.6, 20.3 ( $\text{CH}_3$ ,  $^i\text{Bu}$ ).  $^1\text{H-NMR}$  (300 MHz,  $\text{CDCl}_3$ , minor diastereoisomer **20a**, from the mixture):  $\delta$  9.60 (t,  $J$  = 5.6 Hz, 1H, 4-CONH), 7.57 - 6.74 (m, 20H, Ar, 2'-NH), 3.88 (m, 2H, 4- $\text{CH}_2$ ,  $\text{H}_{2'}$ ), 3.80 (d,  $J$  = 11.9 Hz, 1H,  $\text{NHCH}_2$ ), 3.68 (d,  $J$  = 12.0 Hz, 1H,  $\text{NHCH}_2$ ), 3.21 (dd,  $J$  =

14.1, 3.0 Hz, 1H, H<sub>1'</sub>), 3.20 - 2.98 (m, 4H, H<sub>3</sub>, CH<sub>2</sub>, <sup>i</sup>Bu, 4-CH<sub>2</sub>), 2.70 (m, 1H, H<sub>3'</sub>), 2.55 (m, 1H, H<sub>3'</sub>), 2.03 (m, 1H, H<sub>1'</sub>), 1.94 (m, 1H, CH<sub>2</sub>, <sup>i</sup>Bu), 1.56 (m, 1H, CH, <sup>i</sup>Bu), 0.71 (t app, *J* = 6.8 Hz, 6H, CH<sub>3</sub>, <sup>i</sup>Bu). <sup>13</sup>C-NMR (75 MHz, CDCl<sub>3</sub>): δ 171.4 (4-CONH), 167.7 (C<sub>2</sub>), 141.9, 140.8, 139.6, 136.6, 136.3, 130.2, 129.4, 129.3, 128.9, 128.6, 127.6, 127.4, 127.1, 127.1, 126.9, 126.4 (Ar), 64.3 (C<sub>4</sub>), 55.1 (C<sub>2'</sub>), 53.1 (NHCH<sub>2</sub>), 49.8 (CH<sub>2</sub>, <sup>i</sup>Bu), 49.5 (C<sub>3</sub>), 46.4 (C<sub>1'</sub>), 41.0 (4-CH<sub>2</sub>), 38.5 (C<sub>3'</sub>), 27.8 (CH, <sup>i</sup>Bu), 20.0, 19.8 (CH<sub>3</sub>, <sup>i</sup>Bu). MS(ES)<sup>+</sup>: 560.49 [M+H]<sup>+</sup>. Exact mass calculated for C<sub>37</sub>H<sub>41</sub>N<sub>3</sub>O<sub>2</sub>: 559.31988, found 559.32211.

**4*R,S*-Benzyl-4-[*N*-(*iso*-butyl)carbamoyl]-1-[(2'*S*-(3''-fluorobenzyl)amino-3'-phenyl)prop-1'-yl]-2-oxoazetidine (21a,b)**

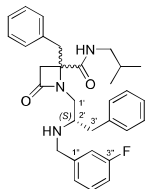

Syrup. Yield: 32% (From **12a,b** and 3-fluorobenzaldehyde). Eluent: 9% to 33% of EtOAc in DCM. HPLC: t<sub>R</sub> = 6.49 (m, **21a**) y 6.72 (M, **21b**) min (gradient from 15% to 95% of A in 10 min). Ratio of diastereoisomers M:m, 2.6:1. <sup>1</sup>H-NMR (300 MHz, CDCl<sub>3</sub>, major diastereoisomer **21b**, from the mixture): δ 9.80 (s, 1H, 4-CONH), 7.39 - 6.45 (m, 20H, Ar, 2'-NH), 3.92 (d, *J* = 14.3 Hz, 1H, 4-CH<sub>2</sub>), 3.62 (m, 1H, H<sub>1'</sub>), 3.39 (d, *J* = 13.1 Hz, 1H, NHCH<sub>2</sub>), 3.35 (d, *J* = 13.2 Hz, 1H, NHCH<sub>2</sub>), 3.20 - 2.98 (m, 5H, CH<sub>2</sub>, <sup>i</sup>Bu, H<sub>1'</sub>, H<sub>3</sub>, 4-CH<sub>2</sub>), 2.75 - 2.50 (m, 4H, CH<sub>2</sub>, <sup>i</sup>Bu, H<sub>2'</sub>, H<sub>3'</sub>), 1.57 (m, 1H, CH, <sup>i</sup>Bu), 0.74 (d, *J* = 6.7 Hz, 3H, CH<sub>3</sub>, <sup>i</sup>Bu), 0.73 (d, *J* = 6.6 Hz, 3H, CH<sub>3</sub>, <sup>i</sup>Bu). <sup>13</sup>C-NMR (75 MHz, CDCl<sub>3</sub>): δ 172.6 (4-CONH), 169.4 (C<sub>2</sub>), 162.9 (d, *J* = 246.8 Hz, C<sub>3''</sub>), 140.9 (d, *J* = 6.7 Hz, C<sub>1''</sub>), 137.6, 136.5, 130.5 (d, *J* = 8.2 Hz, C<sub>5''</sub>), 130.1, 129.0, 129.0, 128.9, 127.5, 127.1, 123.6 (d, *J* = 2.8 Hz, C<sub>6''</sub>), 114.9 (d, *J* = 21.4 Hz, C<sub>2''</sub>), 114.4 (d, *J* = 21.3 Hz, C<sub>4''</sub>) (Ar), 65.2 (C<sub>4</sub>), 56.3 (C<sub>2'</sub>), 50.2 (C<sub>3</sub>), 47.4 (NHCH<sub>2</sub>), 47.0 (CH<sub>2</sub>, <sup>i</sup>Bu), 43.1 (C<sub>1'</sub>), 40.4 (4-CH<sub>2</sub>), 38.2 (C<sub>3'</sub>), 28.3 (CH, <sup>i</sup>Bu), 20.3, 20.2 (CH<sub>3</sub>, <sup>i</sup>Bu). <sup>1</sup>H-NMR (300 MHz, CDCl<sub>3</sub>, minor diastereoisomer **21a**, from the mixture): δ 9.38 (s, 1H, 4-CONH), 7.39 - 6.75 (m, 20H, Ar, 2'-NH), 3.85 (d, *J* = 13.9 Hz, 4-CH<sub>2</sub>), 3.76 (m, 1H, H<sub>2'</sub>), 3.69 (d, *J* = 12.2 Hz, 1H, NHCH<sub>2</sub>), 3.62 (m, 1H, NHCH<sub>2</sub>), 3.25 (dd, *J* = 13.9, 2.6 Hz, 1H, H<sub>1'</sub>), 3.20 - 2.98 (m, 4H, H<sub>3</sub>, CH<sub>2</sub>, <sup>i</sup>Bu, 4-CH<sub>2</sub>), 2.75 - 2.50 (m, 2H, H<sub>3'</sub>), 2.12 - 1.99 (m, 2H, H<sub>1'</sub>, CH<sub>2</sub>, <sup>i</sup>Bu), 1.28 (m, 1H, CH, <sup>i</sup>Bu), 0.53 (d, *J* = 6.7 Hz, 3H, CH<sub>3</sub>, <sup>i</sup>Bu), 0.42 (d, *J* = 6.6 Hz, 3H, CH<sub>3</sub>, <sup>i</sup>Bu). <sup>13</sup>C-NMR (75 MHz, CDCl<sub>3</sub>): δ 171.5 (4-CONH), 167.8 (C<sub>2</sub>), 163.0 (d, *J* = 246.8 Hz, C<sub>3''</sub>), 141.4 (d, *J* = 8.0 Hz, C<sub>1''</sub>), 136.2, 136.0, 130.4 (d, *J* = 7.6 Hz, C<sub>5''</sub>), 130.3, 130.2, 129.4, 128.7, 127.3, 127.2, 124.4 (d, *J* = 2.8 Hz, C<sub>6''</sub>), 115.6 (d, *J* = 21.0 Hz, C<sub>2''</sub>), 114.6 (d, *J* = 21.7 Hz, C<sub>4''</sub>) (Ar), 64.3 (C<sub>4</sub>), 55.1 (C<sub>2'</sub>), 52.1 (NHCH<sub>2</sub>), 49.7 (CH<sub>2</sub>, <sup>i</sup>Bu), 49.5 (C<sub>3</sub>), 46.6 (C<sub>1'</sub>), 41.0 (4-CH<sub>2</sub>), 38.6 (C<sub>3'</sub>), 28.0 (CH, <sup>i</sup>Bu), 20.1, 19.9 (CH<sub>3</sub>, <sup>i</sup>Bu). MS(ES)<sup>+</sup>: 502.39 [M+H]<sup>+</sup>. Exact mass calculated for C<sub>31</sub>H<sub>36</sub>FN<sub>3</sub>O<sub>2</sub>: 501.27916, found 501.27949.

**4*R,S*-Benzyl-4-[*N*-(*iso*-butyl)carbamoyl]-1-[(2'*S*-(3''-chlorobenzyl)amino-3'-phenyl)prop-1'-yl]-2-oxoazetidine (22a,b)**

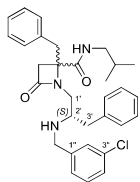

Syrup. Yield: 27% (From **12a,b** and 3-chlorobenzaldehyde). Eluent: 9% to 33% of EtOAc in DCM. HPLC: t<sub>R</sub> = 6.77 (m, **22a**) y 7.02 (M, **22b**) min (gradient from 15% to 95% of A in 10 min). Ratio of

diastereoisomers M:m, 2.4:1.  $^1\text{H-NMR}$  (300 MHz,  $\text{CDCl}_3$ , major diastereoisomer **22b**, from the mixture):  $\delta$  9.78 (t,  $J = 5.9$  Hz, 1H, 4-CONH), 7.28 - 6.66 (m, 20H, Ar, 2'-NH), 3.94 (d,  $J = 14.3$  Hz, 1H, 4- $\text{CH}_2$ ), 3.37 (d,  $J = 13.2$  Hz, 1H,  $\text{NHCH}_2$ ), 3.31 (d,  $J = 13.3$  Hz, 1H,  $\text{NHCH}_2$ ), 3.13 - 2.88 (m, 5H,  $\text{CH}_2$ ,  $^i\text{Bu}$ ,  $\text{H}_{1'}$ , 4- $\text{CH}_2$ ,  $\text{H}_3$ ), 2.77 - 2.50 (m, 2H,  $\text{H}_{3'}$ ), 2.18 - 1.99 (m, 2H,  $\text{H}_{1'}$ ,  $\text{CH}_2$ ,  $^i\text{Bu}$ ), 1.57 (m, 1H, CH,  $^i\text{Bu}$ ), 0.76 (d,  $J = 6.6$  Hz, 3H,  $\text{CH}_3$ ,  $^i\text{Bu}$ ), 0.73 (d,  $J = 6.6$  Hz, 3H,  $\text{CH}_3$ ,  $^i\text{Bu}$ ).  $^{13}\text{C-NMR}$  (75 MHz,  $\text{CDCl}_3$ ):  $\delta$  172.5 (4-CONH), 169.4 ( $\text{C}_2$ ), 140.4, 137.6, 136.5, 134.5, 130.1, 129.9, 129.0, 128.9, 128.9, 128.2, 127.7, 127.5, 127.1, 126.2 (Ar), 65.2 ( $\text{C}_4$ ), 56.2 ( $\text{C}_{2'}$ ), 50.2 ( $\text{C}_3$ ), 47.4 ( $\text{NHCH}_2$ ), 47.0 ( $\text{CH}_2$ ,  $^i\text{Bu}$ ), 43.0 ( $\text{C}_{1'}$ ), 40.5 (4- $\text{CH}_2$ ), 38.2 ( $\text{C}_{3'}$ ), 28.3 (CH,  $^i\text{Bu}$ ), 20.32, 20.25 ( $\text{CH}_3$ ,  $^i\text{Bu}$ ).  $^1\text{H-NMR}$  (300 MHz,  $\text{CDCl}_3$ , major diastereoisomer **22a**, from the mixture):  $\delta$  9.34 (s ancho, 1H, 4-CONH), 7.28 - 6.88 (m, 20H, Ar, 2'-NH), 3.86 (d,  $J = 14.0$  Hz, 4- $\text{CH}_2$ ), 3.76 (m, 1H,  $\text{H}_{2'}$ ), 3.68 (d,  $J = 12.3$  Hz, 1H,  $\text{NHCH}_2$ ), 3.60 (m, 2H,  $\text{H}_{1'}$ ,  $\text{NHCH}_2$ ), 3.18 (dd,  $J = 13.5$ , 6.9 Hz, 1H,  $\text{H}_{1'}$ ), 3.13 - 2.88 (m, 4H,  $\text{H}_3$ ,  $\text{CH}_2$ ,  $^i\text{Bu}$ , 4- $\text{CH}_2$ ), 2.77 - 2.50 (m, 2H,  $\text{H}_{3'}$ ), 2.18 - 1.99 (m, 2H,  $\text{H}_{1'}$ ,  $\text{CH}_2$ ,  $^i\text{Bu}$ ), 1.27 (m, 1H, CH,  $^i\text{Bu}$ ), 0.54 (d,  $J = 6.7$  Hz, 3H,  $\text{CH}_3$ ,  $^i\text{Bu}$ ), 0.43 (d,  $J = 6.6$  Hz, 3H,  $\text{CH}_3$ ,  $^i\text{Bu}$ ).  $^{13}\text{C-NMR}$  (75 MHz,  $\text{CDCl}_3$ ):  $\delta$  171.5 (4-CONH), 167.7 ( $\text{C}_2$ ), 141.0, 136.3, 136.0, 134.7, 130.2, 129.4, 129.2, 128.9, 128.6, 127.9, 127.3, 127.2, 126.9, 124.0 (Ar), 64.3 ( $\text{C}_4$ ), 55.1 ( $\text{C}_{2'}$ ), 52.4 ( $\text{NHCH}_2$ ), 49.8 ( $\text{CH}_2$ ,  $^i\text{Bu}$ ), 49.5 ( $\text{C}_3$ ), 46.6 ( $\text{C}_{1'}$ ), 41.0 (4- $\text{CH}_2$ ), 38.6 ( $\text{C}_{3'}$ ), 28.0 (CH,  $^i\text{Bu}$ ), 20.1, 19.9 ( $\text{CH}_3$ ,  $^i\text{Bu}$ ). MS(ES) $^+$ : 518.24  $[\text{M}+\text{H}]^+$ . Exact mass calculated for  $\text{C}_{31}\text{H}_{36}\text{ClN}_3\text{O}_2$ : 517.24961, found 517.2505.

**4R,S-Benzyl-4-[N-(iso-butyl)carbamoyl]-1-[(2'S-(3'-bromobenzyl)amino-3'- phenyl) prop-1'-yl]-2-oxoazetidine (23a,b)**

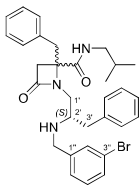

Syrup. Yield: 30% (From **12a,b** and 3-bromobenzaldehyde). Eluent: 9% to 16% of EtOAc in DCM. HPLC:  $t_R = 6.86$  (m, **23a**) y 7.13 (M, **23b**) min (gradient from 15% to 95% of A in 10 min). Ratio of diastereoisomers M:m, 2.9:1.  $^1\text{H-NMR}$  (300 MHz,  $\text{CDCl}_3$ , major diastereoisomer **23b**, from the mixture):  $\delta$  9.81 (t,  $J = 6.0$  Hz, 1H, 4-CONH), 7.44 - 6.69 (m, 15H, Ar, 2'-NH), 3.96 (d,  $J = 14.3$  Hz, 1H, 4- $\text{CH}_2$ ), 3.60 (m, 1H,  $\text{H}_{1'}$ ), 3.35 (d,  $J = 13.2$  Hz, 1H,  $\text{NHCH}_2$ ), 3.29 (d,  $J = 13.2$  Hz, 1H,  $\text{NHCH}_2$ ), 3.15 - 2.85 (m, 5H,  $\text{CH}_2$ ,  $^i\text{Bu}$ ,  $\text{H}_{1'}$ ,  $\text{H}_3$ , 4- $\text{CH}_2$ ), 2.77 - 2.44 (m, 4H,  $\text{CH}_2$ ,  $^i\text{Bu}$ ,  $\text{H}_{2'}$ ,  $\text{H}_{3'}$ ), 1.59 (m, 1H, CH,  $^i\text{Bu}$ ), 1.27 (m, 1H, CH,  $^i\text{Bu}$ ), 0.76 (d,  $J = 6.6$  Hz, 3H,  $\text{CH}_3$ ,  $^i\text{Bu}$ ), 0.73 (d,  $J = 6.5$  Hz, 3H,  $\text{CH}_3$ ,  $^i\text{Bu}$ ).  $^{13}\text{C-NMR}$  (75 MHz,  $\text{CDCl}_3$ ):  $\delta$  172.5 (4-CONH), 169.4 ( $\text{C}_2$ ), 140.8, 137.6, 136.6, 131.1, 130.6, 130.3, 130.2, 129.1, 128.9, 128.9, 127.5, 127.1, 126.6, 122.7 (Ar), 65.2 ( $\text{C}_4$ ), 56.2 ( $\text{C}_{2'}$ ), 50.3 ( $\text{C}_3$ ), 47.3 ( $\text{NHCH}_2$ ), 47.0 ( $\text{CH}_2$ ,  $^i\text{Bu}$ ), 43.0 ( $\text{C}_{1'}$ ), 40.5 (4- $\text{CH}_2$ ), 38.3 ( $\text{C}_{3'}$ ), 28.4 (CH,  $^i\text{Bu}$ ), 20.4, 20.3 ( $\text{CH}_3$ ,  $^i\text{Bu}$ ).  $^1\text{H-NMR}$  (300 MHz,  $\text{CDCl}_3$ , minor diastereoisomer **23a**, from the mixture):  $\delta$  9.36 (t,  $J = 6.6$  Hz, 1H, 4-CONH), 7.44 - 6.87 (m, 15H, Ar, 2'-NH), 3.87 (d,  $J = 13.9$  Hz, 4- $\text{CH}_2$ ), 3.77 (m, 1H,  $\text{H}_{2'}$ ), 3.67 (d,  $J = 12.1$  Hz, 1H,  $\text{NHCH}_2$ ), 3.60 (m, 1H,  $\text{NHCH}_2$ ), 3.19 (dd,  $J = 13.3$ , 6.8 Hz, 1H,  $\text{H}_{1'}$ ), 3.15 - 2.85 (m, 4H,  $\text{CH}_2$ ,  $^i\text{Bu}$ ,  $\text{H}_3$ , 4- $\text{CH}_2$ ), 2.77 - 2.44 (m, 2H,  $\text{H}_{3'}$ ), 2.18 - 1.96 (m, 2H,  $\text{H}_{1'}$ ,  $\text{CH}_2$ ,  $^i\text{Bu}$ ), 1.27 (m, 1H, CH,  $^i\text{Bu}$ ), 0.54 (d,  $J = 6.6$  Hz, 3H,  $\text{CH}_3$ ,  $^i\text{Bu}$ ), 0.43 (d,  $J = 6.6$  Hz, 3H,  $\text{CH}_3$ ,  $^i\text{Bu}$ ).  $^{13}\text{C-NMR}$  (75 MHz,  $\text{CDCl}_3$ ):  $\delta$  171.4 (4-CONH), 167.8 ( $\text{C}_2$ ), 141.4, 136.3, 136.0, 131.8, 130.8, 130.4, 130.2, 129.4, 129.1, 128.6, 127.4, 127.3, 127.2, 122.9 (Ar), 64.3 ( $\text{C}_4$ ), 55.1 ( $\text{C}_{2'}$ ), 52.5 ( $\text{NHCH}_2$ ), 49.9 ( $\text{CH}_2$ ,  $^i\text{Bu}$ ), 49.6 ( $\text{C}_3$ ), 46.6

(C<sub>1'</sub>), 41.0 (4-CH<sub>2</sub>), 38.7 (C<sub>3'</sub>), 28.0 (CH, <sup>i</sup>Bu), 20.1, 20.0 (CH<sub>3</sub>, <sup>i</sup>Bu). MS(ES)<sup>+</sup>: 562.33 [M+H]<sup>+</sup> y 564.24 [M+2]<sup>+</sup>. Exact mass calculated for C<sub>31</sub>H<sub>36</sub>BrN<sub>3</sub>O<sub>2</sub>: 561.19909, found 561.20026.

**4*R,S*-Benzyl-4-[*N*-(*iso*-butyl)carbamoyl]-1-[(2'*S*-(3-iodobenzyl)amino-3'- phenyl)prop-1'-yl]-2-oxoazetidine (24a,b)**

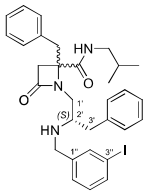

Syrup. Yield: 19% (From **12a,b** and 3-iodobenzaldehyde). Eluent: 9% to 33% of EtOAc in DCM. HPLC: t<sub>R</sub> = 6.91 (m, **24a**) y 7.16 (M, **24b**) min (gradient from 15% to 95% of A in 10 min). Ratio of diastereoisomers M:m, 2.7:1. <sup>1</sup>H-NMR (300 MHz, CDCl<sub>3</sub>, major diastereoisomer **24b**, from the mixture): δ 9.82 (s, 1H, 4-CONH), 7.55 - 6.70 (m, 15H, Ar, 2'-NH), 3.96 (d, *J* = 14.3 Hz, 1H, 4-CH<sub>2</sub>), 3.32 (d, *J* = 13.1 Hz, 1H, NHCH<sub>2</sub>), 3.25 (d, *J* = 13.1 Hz, 1H, NHCH<sub>2</sub>), 3.12 - 2.88 (m, 5H, CH<sub>2</sub>, <sup>i</sup>Bu, H<sub>1'</sub>, H<sub>3</sub>, 4-CH<sub>2</sub>), 2.79 - 2.51 (m, 4H, CH<sub>2</sub>, <sup>i</sup>Bu, H<sub>2'</sub>, H<sub>3'</sub>), 1.58 (m, 1H, CH, <sup>i</sup>Bu), 0.77 (d, *J* = 6.5 Hz, 3H, CH<sub>3</sub>, <sup>i</sup>Bu), 0.76 (d, *J* = 6.5 Hz, 3H, CH<sub>3</sub>, <sup>i</sup>Bu). <sup>13</sup>C-NMR (75 MHz, CDCl<sub>3</sub>): δ 172.5 (4-CONH), 169.4 (C<sub>2</sub>), 140.8, 137.6, 137.1, 136.6, 130.4, 130.2, 129.1, 129.0, 128.9, 128.6, 127.5, 127.3, 127.1, 94.6 (Ar), 65.2, (C<sub>4</sub>), 56.2 (C<sub>2'</sub>), 50.3 (C<sub>3</sub>), 47.3 (NHCH<sub>2</sub>), 47.1 (CH<sub>2</sub>, <sup>i</sup>Bu), 43.0 (C<sub>1'</sub>), 40.6 (4-CH<sub>2</sub>), 38.3 (C<sub>3'</sub>), 28.4 (CH, <sup>i</sup>Bu), 20.4, 20.3 (CH<sub>3</sub>, <sup>i</sup>Bu). <sup>1</sup>H-NMR (300 MHz, CDCl<sub>3</sub>, minor diastereoisomer **24a**, from the mixture): δ 9.34 (s, 1H, 4-CONH), 7.64 - 6.90 (m, 15H, Ar, 2'-NH), 3.87 (d, *J* = 14.0 Hz, 4-CH<sub>2</sub>), 3.75 (m, 1H, H<sub>2'</sub>), 3.64 (d, *J* = 11.5 Hz, 1H, NHCH<sub>2</sub>), 3.60 (m, 2H, H<sub>1'</sub>, NHCH<sub>2</sub>), 3.18 (dd, *J* = 13.1, 6.6 Hz, 1H, H<sub>1'</sub>), 3.12 - 2.88 (m, 4H, H<sub>3</sub>, CH<sub>2</sub>, <sup>i</sup>Bu, 4-CH<sub>2</sub>), 2.79 - 2.51 (m, 2H, H<sub>3'</sub>), 2.15 - 1.96 (m, 2H, H<sub>1'</sub>, CH<sub>2</sub>, <sup>i</sup>Bu), 1.27 (m, 1H, CH, <sup>i</sup>Bu), 0.55 (d, *J* = 6.6 Hz, 3H, CH<sub>3</sub>, <sup>i</sup>Bu), 0.43 (d, *J* = 6.6 Hz, 3H, CH<sub>3</sub>, <sup>i</sup>Bu). <sup>13</sup>C-NMR (75 MHz, CDCl<sub>3</sub>): δ 171.5 (4-CONH), 167.8 (C<sub>2</sub>), 141.4, 137.8, 136.7, 136.3, 130.6, 130.3, 129.4, 128.7, 128.6, 128.0, 127.3, 127.2, 127.0, 94.7 (Ar), 64.3 (C<sub>4</sub>), 55.2 (C<sub>2'</sub>), 52.4 (NHCH<sub>2</sub>), 49.8 (CH<sub>2</sub>, <sup>i</sup>Bu), 49.6 (C<sub>3</sub>), 47.0 (C<sub>1'</sub>), 41.0 (4-CH<sub>2</sub>), 38.7 (C<sub>3'</sub>), 28.0 (CH, <sup>i</sup>Bu), 20.2, 20.0 (CH<sub>3</sub>, <sup>i</sup>Bu). MS(ES)<sup>+</sup>: 610.33 [M+H]<sup>+</sup>. Exact mass calculated for C<sub>31</sub>H<sub>36</sub>I N<sub>3</sub>O<sub>2</sub>: 609.18522, found 609.18554.

**4*R,S*-Benzyl-4-[*N*-(*iso*-butyl)carbamoyl]-1-[(2'*S*-(3'-methoxybenzyl)amino-3'- phenyl)prop-1'-yl]-2-oxoazetidine (25a,b)**

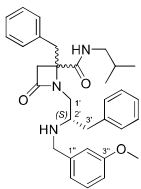

Syrup. Yield: 46% (From **12a,b** and 3-methoxybenzaldehyde). Eluent: 0.9% of MeOH in DCM. HPLC: t<sub>R</sub> = 6.39 (m, **25a**) y 6.63 (M, **25 b**) min (gradient from 15% to 95% of A in 10 min). Ratio of diastereoisomers M:m, 2.5:1. <sup>1</sup>H-NMR (300 MHz, CDCl<sub>3</sub>, major diastereoisomer **25b**, from the mixture): δ 10.04 (s, 1H, 4-CONH), 7.40 - 6.36 (m, 15H, Ar, 2'-NH), 3.93 (d, *J* = 14.4 Hz, 1H, 4-CH<sub>2</sub>), 3.67 (s, 3H, OCH<sub>3</sub>), 3.64 (dd, *J* = 14.9, 9.0 Hz, 1H, H<sub>1'</sub>), 3.34 (d, *J* = 12.9 Hz, 1H, NHCH<sub>2</sub>), 3.33 (d, *J* = 13.1 Hz, 1H, NHCH<sub>2</sub>), 3.19 - 2.96 (m, 5H, CH<sub>2</sub>, <sup>i</sup>Bu, H<sub>1'</sub>, H<sub>3</sub>, 4-CH<sub>2</sub>), 2.77 - 2.61 (m, 2H, H<sub>2'</sub>, H<sub>3'</sub>), 2.61 - 2.50 (m, 2H, CH<sub>2</sub>, <sup>i</sup>Bu, H<sub>3'</sub>), 1.56 (m, 1H, CH, <sup>i</sup>Bu), 0.74 (d, *J* = 6.7 Hz, 3H, CH<sub>3</sub>, <sup>i</sup>Bu), 0.72 (d, *J* = 6.6 Hz, 3H, CH<sub>3</sub>, <sup>i</sup>Bu). <sup>13</sup>C-NMR (75 MHz, CDCl<sub>3</sub>): δ 172.6 (4-CONH), 169.4 (C<sub>2</sub>), 159.9, 140.0, 137.8, 136.6, 130.2, 129.7, 129.5, 129.0, 129.0, 128.9, 127.4, 127.0, 120.3, 113.6 (Ar), 65.3 (C<sub>4</sub>),

56.4 (C<sub>2</sub>'), 55.3 (OCH<sub>3</sub>), 50.2 (C<sub>3</sub>'), 48.1 (NHCH<sub>2</sub>), 47.0 (CH<sub>2</sub>, <sup>i</sup>Bu), 43.1 (C<sub>1</sub>'), 40.4 (4-CH<sub>2</sub>), 38.3 (C<sub>3</sub>'), 28.3 (CH, <sup>i</sup>Bu), 20.3, 20.2 (CH<sub>3</sub>, <sup>i</sup>Bu). <sup>1</sup>H-NMR (300 MHz, CDCl<sub>3</sub>, minor diastereoisomer **25a**, from the mixture): δ 9.57 (s, 1H, 4-CONH), 7.40 - 6.41 (m, 15H, Ar, 2'-NH), 3.87 (d, *J* = 14.0 Hz, 4-CH<sub>2</sub>), 3.79 (m, 1H, H<sub>2</sub>'), 3.67 (s, 3H, OCH<sub>3</sub>), 3.62 (d, *J* = 11.6 Hz, 1H, NHCH<sub>2</sub>), 3.56 (d, *J* = 11.8 Hz, 1H, NHCH<sub>2</sub>), 3.24 (dd, *J* = 14.2, 3.0 Hz, 1H, H<sub>1</sub>'), 3.19 - 2.96 (m, 3H, H<sub>3</sub>, CH<sub>2</sub>, <sup>i</sup>Bu), 2.92 (d, *J* = 14.1 Hz, 1H, 4-CH<sub>2</sub>), 2.68 (m, 1H, H<sub>3</sub>'), 2.55 (m, 1H, H<sub>3</sub>'), 2.06 - 1.90 (m, 2H, H<sub>1</sub>', CH<sub>2</sub>, <sup>i</sup>Bu), 1.25 (m, 1H, CH, <sup>i</sup>Bu), 0.50 (d, *J* = 6.6 Hz, 3H, CH<sub>3</sub>, <sup>i</sup>Bu), 0.37 (d, *J* = 6.6 Hz, 3H, CH<sub>3</sub>, <sup>i</sup>Bu). <sup>13</sup>C-NMR (75 MHz, CDCl<sub>3</sub>): δ 171.5 (4-CONH), 167.8 (C<sub>2</sub>'), 160.0, 140.6, 136.4, 136.1, 130.3, 129.9, 129.3, 128.7, 128.6, 127.3, 127.1, 121.0, 114.6, 112.9 (Ar), 64.3 (C<sub>4</sub>'), 55.3 (C<sub>2</sub>'), 55.1 (OCH<sub>3</sub>), 53.1 (NHCH<sub>2</sub>), 49.9 (CH<sub>2</sub>, <sup>i</sup>Bu), 49.6 (C<sub>3</sub>'), 46.5 (C<sub>1</sub>'), 41.1 (4-CH<sub>2</sub>), 38.5 (C<sub>3</sub>'), 27.8 (CH, <sup>i</sup>Bu), 20.1, 19.9 (CH<sub>3</sub>, <sup>i</sup>Bu). MS(ES)<sup>+</sup>: 514.33 [M+H]<sup>+</sup>. Exact mass calculated for C<sub>32</sub>H<sub>39</sub>N<sub>3</sub>O<sub>3</sub>: 513.29914, found 513.29984.

**4*R,S*-Benzyl-4-[*N*-(*iso*-butyl)carbamoyl]-1-[(2'*S*-(3''-benzyloxibenzyl)amino-3'-phenyl)prop-1'-yl]-2-oxoazetidine (26a,b)**

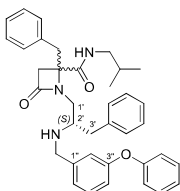

Sirup. Yield: 24% (From **12a,b** and 3-benzyloxybenzaldehyde). Eluent: 9% to 33% of EtOAc in DCM. HPLC: t<sub>R</sub> = 7.18 (m, **26a**) y 7.34 (M, **26 b**) min (gradient from 15% to 95% of A in 10 min). Ratio of diastereoisomers M:m, 5.7:1. <sup>1</sup>H-NMR (300 MHz, CDCl<sub>3</sub>, major diastereoisomer): δ 9.98 (s, 1H, 4-CONH), 7.53 - 6.65 (m, 20H, Ar, 2'-NH), 3.93 (d, *J* = 14.3 Hz, 1H, 4-CH<sub>2</sub>), 3.60 (dd, *J* = 15.0, 6.0 Hz, 1H, H<sub>1</sub>'), 3.32 (d, *J* = 13.1 Hz, 1H, NHCH<sub>2</sub>), 3.26 (d, *J* = 13.1 Hz, 1H, NHCH<sub>2</sub>), 3.07 - 2.88 (m, 5H, CH<sub>2</sub>, <sup>i</sup>Bu, H<sub>1</sub>', H<sub>3</sub>, 4-CH<sub>2</sub>), 2.76 - 2.51 (m, 2H, H<sub>2</sub>', H<sub>3</sub>'), 2.61 - 2.50 (m, 2H, CH<sub>2</sub>, <sup>i</sup>Bu, H<sub>3</sub>'), 1.58 (m, 1H, CH, <sup>i</sup>Bu), 0.75 (t, *J* = 6.7 Hz, 6H, CH<sub>3</sub>, <sup>i</sup>Bu). <sup>13</sup>C-NMR (75 MHz, CDCl<sub>3</sub>, major diastereoisomer): δ 172.5 (4-CONH), 169.4 (C<sub>2</sub>'), 157.6, 157.0, 140.4, 137.7, 136.5, 130.2, 130.0, 129.9, 128.9, 128.9, 128.8, 127.4, 127.0, 123.6, 122.6, 119.1, 118.3, 117.8 (Ar), 65.2 (C<sub>4</sub>'), 56.3 (C<sub>2</sub>'), 50.2 (C<sub>3</sub>'), 47.7 (NHCH<sub>2</sub>), 47.0 (CH<sub>2</sub>, <sup>i</sup>Bu), 43.0 (C<sub>1</sub>'), 40.5 (4-CH<sub>2</sub>), 38.3 (C<sub>3</sub>'), 28.3 (CH, <sup>i</sup>Bu), 20.4, 20.3 (CH<sub>3</sub>, <sup>i</sup>Bu). MS(ES)<sup>+</sup>: 576.26 [M+H]<sup>+</sup>. Exact mass calculated for C<sub>37</sub>H<sub>41</sub>N<sub>3</sub>O<sub>3</sub>: 575.31479, found 575.31707.

**4*R,S*-Benzyl-4-[*N*-(*iso*-butyl)carbamoyl]-1-[(2'*S*-(3''-phenoxybenzyl)amino-3'-phenyl)prop-1'-yl]-2-oxoazetidine (27a,b)**

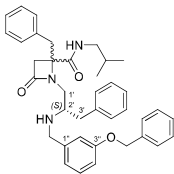

Syrup. Yield: 22% (From **12a,b** and 3-phenoxybenzaldehyde. Eluent: 9% to 20% of EtOAc in DCM. HPLC: t<sub>R</sub> = 7.26 (m, **27a**) y 7.47 (M, **27b**) min (gradient from 15% to 95% of A in 10 min). Ratio of diastereoisomers M:m, 1.5:1. <sup>1</sup>H-NMR (300 MHz, CDCl<sub>3</sub>, major diastereoisomer **27b**, from the mixture): δ 10.06 (t, *J* = 5.9 Hz, 1H, 4-CONH), 7.49 - 6.34 (m, 20H, Ar, 2'-NH), 4.95 (s, 2H, OCH<sub>2</sub>), 3.93 (d, *J* = 14.3 Hz, 1H, 4-CH<sub>2</sub>), 3.61 (dd, *J* = 14.9, 5.7 Hz, 1H, H<sub>1</sub>'), 3.37 (d, *J* = 12.9 Hz, 1H, NHCH<sub>2</sub>), 3.30 (d, *J* = 13.1 Hz, 1H, NHCH<sub>2</sub>), 3.07 - 2.87 (m, 5H, CH<sub>2</sub>, <sup>i</sup>Bu, H<sub>1</sub>', H<sub>3</sub>, 4-CH<sub>2</sub>), 2.75 - 2.49 (m, 4H, H<sub>2</sub>', CH<sub>2</sub>, <sup>i</sup>Bu, H<sub>3</sub>'), 1.58 (m, 1H, CH, <sup>i</sup>Bu), 0.75 (d, *J* = 6.7 Hz, 3H, CH<sub>3</sub>, <sup>i</sup>Bu), 0.73 (d, *J* = 6.7 Hz, 3H, CH<sub>3</sub>, <sup>i</sup>Bu). <sup>13</sup>C-NMR (75 MHz, CDCl<sub>3</sub>): δ 172.6 (4-CONH), 169.7 (C<sub>2</sub>'), 159.1, 140.1, 137.8, 137.0,

136.6, 130.2, 129.8, 129.1, 129.0, 128.9, 128.7, 128.6, 127.5, 127.4, 127.0, 120.6, 114.6, 113.7 (Ar), 70.0 (OCH<sub>2</sub>), 65.3 (C<sub>4</sub>), 56.3 (C<sub>2'</sub>), 50.1 (C<sub>3</sub>), 48.1 (NHCH<sub>2</sub>), 47.0 (CH<sub>2</sub>, <sup>i</sup>Bu), 43.2 (C<sub>1'</sub>), 40.4 (4-CH<sub>2</sub>), 38.3 (C<sub>3'</sub>), 28.3 (CH, <sup>i</sup>Bu), 20.4, 20.3 (CH<sub>3</sub>, <sup>i</sup>Bu). <sup>1</sup>H-NMR (300 MHz, CDCl<sub>3</sub>, major diastereoisomer **27a**, from the mixture): δ 9.58 (t, *J* = 5.7 Hz, 1H, 4-CONH), 7.49 - 6.82 (m, 20H, Ar, 2'-NH), 5.01 (s, 2H, OCH<sub>2</sub>), 3.87 (d, *J* = 14.0 Hz, 4-CH<sub>2</sub>), 3.78 (m, 1H, H<sub>2'</sub>), 3.70 (d, *J* = 11.9 Hz, 1H, NHCH<sub>2</sub>), 3.57 (d, *J* = 11.9 Hz, 1H, NHCH<sub>2</sub>), 3.17 (dd, *J* = 13.4, 6.9 Hz, 1H, H<sub>1'</sub>), 3.07 - 2.87 (m, 5H, CH<sub>2</sub>, <sup>i</sup>Bu, H<sub>1'</sub>, H<sub>3</sub>, 4-CH<sub>2</sub>), 2.75 - 2.49 (m, 2H, H<sub>3'</sub>), 2.09 - 1.91 (m, 2H, H<sub>1'</sub>, CH<sub>2</sub>, <sup>i</sup>Bu), 1.26 (m, 1H, CH, <sup>i</sup>Bu), 0.50 (d, *J* = 6.7 Hz, 3H, CH<sub>3</sub>, <sup>i</sup>Bu), 0.38 (d, *J* = 6.6 Hz, 3H, CH<sub>3</sub>, <sup>i</sup>Bu). <sup>13</sup>C-NMR (75 MHz, CDCl<sub>3</sub>): δ 171.5 (4-CONH), 167.5 (C<sub>2</sub>), 159.2, 140.7, 136.9, 136.4, 136.2, 130.3, 130.0, 129.5, 129.0, 128.8, 128.8, 128.7, 128.2, 127.6, 127.6, 127.1, 121.3, 115.5 (Ar), 70.1 (OCH<sub>2</sub>), 64.3 (C<sub>4</sub>), 55.1 (C<sub>2'</sub>), 53.1 (NHCH<sub>2</sub>), 49.9 (CH<sub>2</sub>, <sup>i</sup>Bu), 49.6 (C<sub>3</sub>), 46.5 (C<sub>1'</sub>), 41.1 (4-CH<sub>2</sub>), 38.6 (C<sub>3'</sub>), 27.9 (CH, <sup>i</sup>Bu), 20.1, 20.0 (CH<sub>3</sub>, <sup>i</sup>Bu). MS(ES)<sup>+</sup>: 590.50 [M+H]<sup>+</sup>. Exact mass calculated for C<sub>38</sub>H<sub>43</sub>N<sub>3</sub>O<sub>3</sub>: 589.33044, found 589.32992.

**4*R,S*-Benzyl-4-[*N*-(*iso*-butyl)carbamoyl]-1-[(2'*S*-(3''-cyanobenzyl)amino-3'-phenyl)prop-1'-yl]-2-oxoazetidine (**28a,b**)**

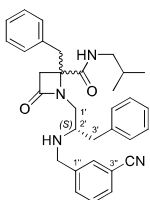

Syrup. Yield: 24% (From **12a,b** and 3-cyanobenzaldehyde). Eluent: 9% to 11% of EtOAc in DCM. HPLC: t<sub>R</sub> = 6.32 (m, **28a**) y 6.57 (M, **28b**) min (gradient from 15% to 95% of A in 10 min). Ratio of diastereoisomers M:m, 1.1:1. <sup>1</sup>H-NMR (300 MHz, CDCl<sub>3</sub>, major diastereoisomer **28b**, from the mixture): δ 9.53 (t, *J* = 5.8 Hz, 1H, 4-CONH), 7.62 - 6.83 (m, 15H, Ar, 2'-NH), 3.94 (d, *J* = 14.3 Hz, 1H, 4-CH<sub>2</sub>), 3.61 (dd, *J* = 15.1, 6.3 Hz, 1H, H<sub>1'</sub>), 3.46 (d, *J* = 13.3 Hz, 1H, NHCH<sub>2</sub>), 3.39 (d, *J* = 13.3 Hz, 1H, NHCH<sub>2</sub>), 3.22 - 2.90 (m, 5H, CH<sub>2</sub>, <sup>i</sup>Bu, H<sub>1'</sub>, H<sub>3</sub>, 4-CH<sub>2</sub>), 2.76 - 2.56 (m, 4H, H<sub>2'</sub>, CH<sub>2</sub>, <sup>i</sup>Bu, H<sub>3'</sub>), 1.58 (m, 1H, CH, <sup>i</sup>Bu), 0.76 (d, *J* = 6.7 Hz, 3H, CH<sub>3</sub>, <sup>i</sup>Bu), 0.75 (d, *J* = 6.7 Hz, 3H, CH<sub>3</sub>, <sup>i</sup>Bu). <sup>13</sup>C-NMR (75 MHz, CDCl<sub>3</sub>): δ 172.4 (4-CONH), 169.3 (C<sub>2</sub>), 140.2, 137.5, 136.0, 132.6, 131.4, 131.2, 130.2, 129.5, 129.2, 128.9, 128.9, 127.5, 127.3 (Ar), 118.5 (CN), 113.0 (Ar), 65.2 (C<sub>4</sub>), 56.1 (C<sub>2'</sub>), 50.2 (C<sub>3</sub>), 47.1 (NHCH<sub>2</sub>), 46.9 (CH<sub>2</sub>, <sup>i</sup>Bu), 43.0 (C<sub>1'</sub>), 40.4 (4-CH<sub>2</sub>), 38.2 (C<sub>3'</sub>), 28.4 (CH, <sup>i</sup>Bu), 20.4, 20.3 (CH<sub>3</sub>, <sup>i</sup>Bu). <sup>1</sup>H-NMR (300 MHz, CDCl<sub>3</sub>, minor diastereoisomer **28a**, from the mixture): δ 9.17 (t, *J* = 5.8 Hz, 1H, 4-CONH), 7.62 - 6.83 (m, 15H, Ar, 2'-NH), 3.84 (d, *J* = 14.0 Hz, 4-CH<sub>2</sub>), 3.74 (m, 1H, H<sub>2'</sub>), 3.68 (d, *J* = 11.9 Hz, 1H, NHCH<sub>2</sub>), 3.57 (d, *J* = 11.9 Hz, 1H, NHCH<sub>2</sub>), 3.28 (dd, *J* = 14.3, 3.1 Hz, 1H, H<sub>1'</sub>), 3.22 - 2.90 (m, 4H, H<sub>3</sub>, CH<sub>2</sub>, <sup>i</sup>Bu, 4-CH<sub>2</sub>), 2.62 (m, 1H, H<sub>3'</sub>), 2.46 (dd, *J* = 13.9, 6.1 Hz, 1H, H<sub>3'</sub>), 2.23 - 2.03 (m, 2H, H<sub>1'</sub>, CH<sub>2</sub>, <sup>i</sup>Bu), 1.33 (m, 1H, CH, <sup>i</sup>Bu), 0.57 (d, *J* = 6.5 Hz, 3H, CH<sub>3</sub>, <sup>i</sup>Bu), 0.47 (d, *J* = 6.5 Hz, 3H, CH<sub>3</sub>, <sup>i</sup>Bu). <sup>13</sup>C-NMR (75 MHz, CDCl<sub>3</sub>): δ 171.5 (4-CONH), 167.8 (C<sub>2</sub>), 140.6, 136.6, 136.2, 133.4, 132.1, 131.3, 130.3, 129.7, 129.3, 129.0, 128.7, 127.4, 127.3 (Ar), 118.51 (CN), 112.81 (Ar), 64.4 (C<sub>4</sub>), 55.0 (C<sub>2'</sub>), 52.2 (NHCH<sub>2</sub>), 49.8 (CH<sub>2</sub>, <sup>i</sup>Bu), 49.4 (C<sub>3</sub>), 46.8 (C<sub>1'</sub>), 41.0 (4-CH<sub>2</sub>), 38.9 (C<sub>3'</sub>), 28.1 (CH, <sup>i</sup>Bu), 20.2, 20.0 (CH<sub>3</sub>, <sup>i</sup>Bu). MS(ES)<sup>+</sup>: 509.36 [M+H]<sup>+</sup>. Exact mass calculated for C<sub>32</sub>H<sub>36</sub>N<sub>4</sub>O<sub>2</sub>: 508.28383, found 508.2845.

**4*R,S*-Benzyl-4-[*N*-(*iso*-butyl)carbamoyl]-1-[(2'*S*-(3''-nitrobenzyl)amino-3'-phenyl)prop-1'-yl]-2-oxoazetidine (**29a,b**)**

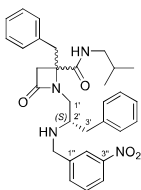

Syrup. Yield: 16% (From **12a,b** and 3-nitrobenzaldehyde). Eluent: 9% to 50% of EtOAc in DCM. HPLC:  $t_R$  = 6.47 (M, **29a**) y 6.73 (m, **29b**) min (gradient from 15% to 95% of A in 10 min). Ratio of diastereoisomers M:m, 1.2:1.  $^1\text{H-NMR}$  (300 MHz,  $\text{CDCl}_3$ , major diastereoisomer **29a**, from the mixture):  $\delta$  9.19 (t,  $J$  = 5.2 Hz, 1H, 4-CONH), 8.16 - 6.84 (m, 15H, Ar, 2'-NH), 3.83 (d,  $J$  = 14.0 Hz, 4- $\text{CH}_2$ ), 3.76 (s, 2H,  $\text{NHCH}_2$ ), 3.73 (m, 1H,  $\text{H}_2'$ ), 3.29 (dd,  $J$  = 14.0, 3.1 Hz, 1H,  $\text{H}_1'$ ), 3.20 - 2.90 (m, 4H,  $\text{H}_3$ ,  $\text{CH}_2$ ,  $^i\text{Bu}$ , 4- $\text{CH}_2$ ), 2.65 (m, 1H,  $\text{H}_3'$ ), 2.48 (dd,  $J$  = 13.9, 6.2 Hz, 1H,  $\text{H}_3'$ ), 2.27 - 2.02 (m, 2H,  $\text{H}_1'$ ,  $\text{CH}_2$ ,  $^i\text{Bu}$ ), 1.38 (m, 1H, CH,  $^i\text{Bu}$ ), 0.58 (d,  $J$  = 6.6 Hz, 3H,  $\text{CH}_3$ ,  $^i\text{Bu}$ ), 0.48 (d,  $J$  = 6.6 Hz, 3H,  $\text{CH}_3$ ,  $^i\text{Bu}$ ).  $^{13}\text{C-NMR}$  (75 MHz,  $\text{CDCl}_3$ ):  $\delta$  171.5 (4-CONH), 167.9 ( $\text{C}_2$ ), 148.6, 140.7, 136.5, 135.9, 135.1, 130.3, 129.8, 129.3, 129.1, 128.7, 127.4, 127.3, 123.4, 122.7 (Ar), 64.4 ( $\text{C}_4$ ), 54.9 ( $\text{C}_2'$ ), 51.9 ( $\text{NHCH}_2$ ), 49.8 ( $\text{CH}_2$ ,  $^i\text{Bu}$ ), 49.4 ( $\text{C}_3$ ), 46.8 ( $\text{C}_1'$ ), 41.0 (4- $\text{CH}_2$ ), 38.8 ( $\text{C}_3'$ ), 28.2 (CH,  $^i\text{Bu}$ ), 20.2, 20.1 ( $\text{CH}_3$ ,  $^i\text{Bu}$ ).  $^1\text{H-NMR}$  (300 MHz,  $\text{CDCl}_3$ , minor diastereoisomer **29b**, from the mixture):  $\delta$  9.46 (s, 1H, 4-CONH), 8.16 - 6.84 (m, 15H, Ar, 2'-NH), 3.94 (d,  $J$  = 14.3 Hz, 1H, 4- $\text{CH}_2$ ), 3.64 (dd,  $J$  = 15.1, 7.0 Hz, 1H,  $\text{H}_1'$ ), 3.54 (d,  $J$  = 13.5 Hz, 1H,  $\text{NHCH}_2$ ), 3.48 (d,  $J$  = 13.7 Hz, 1H,  $\text{NHCH}_2$ ), 3.20 - 2.90 (m, 5H,  $\text{CH}_2$ ,  $^i\text{Bu}$ ,  $\text{H}_1'$ ,  $\text{H}_3$ , 4- $\text{CH}_2$ ), 2.79 - 2.57 (m, 4H,  $\text{H}_2'$ ,  $\text{CH}_2$ ,  $^i\text{Bu}$ ,  $\text{H}_3'$ ), 1.59 (m, 1H, CH,  $^i\text{Bu}$ ), 0.74 (d,  $J$  = 6.6 Hz, 6H,  $\text{CH}_3$ ,  $^i\text{Bu}$ ).  $^{13}\text{C-NMR}$  (75 MHz,  $\text{CDCl}_3$ ):  $\delta$  172.5 (4-CONH), 169.3 ( $\text{C}_2$ ), 148.5, 141.0, 137.5, 136.1, 134.2, 130.1, 129.7, 129.1, 129.0, 128.9, 127.6, 127.2, 122.9, 122.6 (Ar), 65.2 ( $\text{C}_4$ ), 56.1 ( $\text{C}_2'$ ), 50.2 ( $\text{C}_3$ ), 49.8 ( $\text{CH}_2$ ,  $^i\text{Bu}$ ), 47.1 ( $\text{NHCH}_2$ ), 43.1 ( $\text{C}_1'$ ), 40.4 (4- $\text{CH}_2$ ), 38.2 ( $\text{C}_3'$ ), 28.4 (CH,  $^i\text{Bu}$ ), 20.33, 20.27 ( $\text{CH}_3$ ,  $^i\text{Bu}$ ). MS(ES) $^+$ : 529.26  $[\text{M}+\text{H}]^+$ . Exact mass calculated for  $\text{C}_{31}\text{H}_{36}\text{N}_4\text{O}_4$ : 528.27366, found 528.2737.

**4*R,S*-Benyl-4-[*N*-(*iso*-butyl)carbamoyl]-1-[(2'*S*-(4''-biphenyl)methylamino-3'-phenyl)prop -1'-yl]-2-oxoazetidine (**30a,b**)**

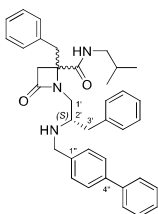

Syrup. Yield: 70% (From **12a,b** 4-biphenyl-carboxaldehyde) Eluent: 9% to 50% of EtOAc in DCM. HPLC:  $t_R$  = 7.19 (m, **30a**) y 7.38 (M, **30b**) min (gradient from 15% to 95% of A in 10 min). Ratio of diastereoisomers M:m, 1.9:1.  $^1\text{H-NMR}$  (300 MHz,  $\text{CDCl}_3$ , major diastereoisomer **30b**, from the mixture):  $\delta$  10.06 (t,  $J$  = 5.9 Hz, 1H, 4-CONH), 7.59 - 6.86 (m, 20H, Ar, 2'-NH), 3.94 (d,  $J$  = 14.4 Hz, 1H, 4- $\text{CH}_2$ ), 3.42 (s, 2H,  $\text{NHCH}_2$ ), 3.21 - 2.88 (m, 5H,  $\text{CH}_2$ ,  $^i\text{Bu}$ ,  $\text{H}_1'$ ,  $\text{H}_3$ , 4- $\text{CH}_2$ ), 2.78 - 2.51 (m, 4H,  $\text{H}_2'$ ,  $\text{CH}_2$ ,  $^i\text{Bu}$ ,  $\text{H}_3'$ ), 1.55 (m, 1H, CH,  $^i\text{Bu}$ ), 0.73 (d,  $J$  = 6.8 Hz, 3H,  $\text{CH}_3$ ,  $^i\text{Bu}$ ), 0.71 (d,  $J$  = 6.6 Hz, 3H,  $\text{CH}_3$ ,  $^i\text{Bu}$ ).  $^{13}\text{C-NMR}$  (75 MHz,  $\text{CDCl}_3$ ):  $\delta$  172.5 (4-CONH), 169.4 ( $\text{C}_2$ ), 140.7, 137.8, 136.5, 136.1, 130.2, 129.0, 128.9, 128.9, 128.8, 128.4, 127.5, 127.4, 127.1, 127.1 (Ar), 65.2 ( $\text{C}_4$ ), 56.4 ( $\text{C}_2'$ ), 50.1 ( $\text{C}_3$ ), 47.6 ( $\text{NHCH}_2$ ), 47.0 ( $\text{CH}_2$ ,  $^i\text{Bu}$ ), 43.2 ( $\text{C}_1'$ ), 40.3 (4- $\text{CH}_2$ ), 38.3 ( $\text{C}_3'$ ), 28.2 (CH,  $^i\text{Bu}$ ), 20.3, 20.2 ( $\text{CH}_3$ ,  $^i\text{Bu}$ ).  $^1\text{H-NMR}$  (300 MHz,  $\text{CDCl}_3$ , minor diastereoisomer **30a**, from the mixture): 9.59 (t,  $J$  = 6.1 Hz, 1H, 4-CONH), 7.59 - 6.90 (m, 20H, Ar, 2'-NH), 3.88 (d,  $J$  = 14.0 Hz, 4- $\text{CH}_2$ ), 3.82 (m, 1H,  $\text{H}_2'$ ), 3.77 (d,  $J$  = 11.9 Hz, 1H,  $\text{NHCH}_2$ ), 3.65 (m, 2H,  $\text{H}_1'$ ,  $\text{NHCH}_2$ ), 3.26 (dd,  $J$  = 14.1, 2.9 Hz, 1H,  $\text{H}_1'$ ), 3.21 - 2.88 (m, 4H,  $\text{H}_3$ ,  $\text{CH}_2$ ,  $^i\text{Bu}$ , 4- $\text{CH}_2$ ), 2.78 - 2.51 (m, 2H,  $\text{H}_3'$ ), 2.10 - 1.89 (m, 2H,  $\text{H}_1'$ ,  $\text{CH}_2$ ,  $^i\text{Bu}$ ),

1.25 (m, 1H, CH, <sup>i</sup>Bu), 0.46 (d, *J* = 6.6 Hz, 3H, CH<sub>3</sub>, <sup>i</sup>Bu), 0.34 (d, *J* = 6.6 Hz, 3H, CH<sub>3</sub>, <sup>i</sup>Bu). <sup>13</sup>C-NMR (75 MHz, CDCl<sub>3</sub>): δ 171.4 (4-CONH), 167.8 (C<sub>2</sub>), 140.7, 140.4, 138.1, 137.5, 136.4, 130.3, 129.5, 129.2, 128.9, 128.6, 127.6, 127.4, 127.2, 126.9 (Ar), 64.3 (C<sub>4</sub>), 55.1 (C<sub>2'</sub>), 52.8 (NHCH<sub>2</sub>), 49.9 (CH<sub>2</sub>, <sup>i</sup>Bu), 49.6 (C<sub>3</sub>), 46.5 (C<sub>1'</sub>), 41.3 (4-CH<sub>2</sub>), 38.6 (C<sub>3'</sub>), 27.8 (CH, <sup>i</sup>Bu), 20.1, 19.9 (CH<sub>3</sub>, <sup>i</sup>Bu). MS(ES)<sup>+</sup>: 560.49 [M+H]<sup>+</sup>. Exact mass calculated for C<sub>37</sub>H<sub>41</sub>N<sub>3</sub>O<sub>2</sub>: 559.31988, found 559.32217.

**4*R,S*-Benzyl-4-[*N*-(*iso*-butyl)carbamoyl]-1-[(2'*S*-(4''-fluorobenzyl)amino-3'-phenyl)prop-1'-yl]-2-oxoazetidine (31a,b)**

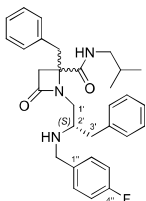

Syrup. Yield: 10% (From **12a,b** and 4-fluorobenzaldehyde). Eluent: 9% to 33% of EtOAc in DCM. HPLC: *t<sub>R</sub>* = 6.45 (M, **31a**) y 6.70 (m, **31b**) min (gradient from 15% to 95% of A in 10 min). Ratio of diastereoisomers M:m, 1.1:1. <sup>1</sup>H-NMR (300 MHz, CDCl<sub>3</sub>, major diastereoisomer **31a**, from the mixture): δ 9.50 (s, 1H, 4-CONH), 7.38 - 6.75 (m, 15H, Ar, 2'-NH), 3.87 (d, *J* = 13.9 Hz, 4-CH<sub>2</sub>), 3.78 (m, 1H, H<sub>2'</sub>), 3.67 (d, *J* = 12.1 Hz, 1H, NHCH<sub>2</sub>), 3.58 (d, *J* = 12.2 Hz, 1H, NHCH<sub>2</sub>), 3.25 (dd, *J* = 14.0, 3.0 Hz, 1H, H<sub>1'</sub>), 3.18 - 2.85 (m, 4H, H<sub>3</sub>, CH<sub>2</sub>, <sup>i</sup>Bu, 4-CH<sub>2</sub>), 2.62 (m, 1H, H<sub>3'</sub>), 2.51 (dd, *J* = 13.7, 5.9 Hz, 1H, H<sub>3'</sub>), 2.11 - 1.92 (m, 2H, H<sub>1'</sub>, CH<sub>2</sub>, <sup>i</sup>Bu), 1.24 (m, 1H, CH, <sup>i</sup>Bu), 0.52 (d, *J* = 6.7 Hz, 3H, CH<sub>3</sub>, <sup>i</sup>Bu), 0.40 (d, *J* = 6.6 Hz, 3H, CH<sub>3</sub>, <sup>i</sup>Bu). <sup>13</sup>C-NMR (75 MHz, CDCl<sub>3</sub>): δ 171.5 (4-CONH), 167.8 (C<sub>2</sub>), 162.3 (d, *J* = 246.3 Hz, C<sub>4''</sub>), 137.8, 136.1, 135.0 (d, *J* = 2.8 Hz, C<sub>1''</sub>), 130.3, 130.2, 129.4, 129.0, 128.9, 128.6, 127.4 (d, *J* = 10.4 Hz, C<sub>2''</sub>, C<sub>6''</sub>), 115.7 (d, *J* = 21.4 Hz, C<sub>3''</sub>, C<sub>5''</sub>) (Ar), 64.4 (C<sub>4</sub>), 55.0 (C<sub>2'</sub>), 52.3 (NHCH<sub>2</sub>), 49.9 (CH<sub>2</sub>, <sup>i</sup>Bu), 49.6 (C<sub>3</sub>), 46.6 (C<sub>1'</sub>), 41.0 (4-CH<sub>2</sub>), 38.1 (C<sub>3'</sub>), 27.9 (CH, <sup>i</sup>Bu), 20.1, 20.0 (CH<sub>3</sub>, <sup>i</sup>Bu). <sup>1</sup>H-NMR (300 MHz, CDCl<sub>3</sub>, minor diastereoisomer **31b**, from the mixture): δ 9.90 (s, 1H, 4-CONH), 7.38 - 6.75 (m, 15H, Ar, 2'-NH), 3.94 (d, *J* = 14.3 Hz, 1H, 4-CH<sub>2</sub>), 3.64 (dd, *J* = 14.7, 6.8 Hz, 1H, H<sub>1'</sub>), 3.36 (s, 2H, NHCH<sub>2</sub>), 3.18 - 2.85 (m, 5H, CH<sub>2</sub>, <sup>i</sup>Bu, H<sub>1'</sub>, H<sub>3</sub>, 4-CH<sub>2</sub>), 2.75 - 2.56 (m, 4H, H<sub>2'</sub>, CH<sub>2</sub>, <sup>i</sup>Bu, H<sub>3'</sub>), 1.54 (m, 1H, CH, <sup>i</sup>Bu), 0.73 (d, *J* = 6.7 Hz, 3H, CH<sub>3</sub>, <sup>i</sup>Bu), 0.72 (d, *J* = 6.7 Hz, 3H, CH<sub>3</sub>, <sup>i</sup>Bu). <sup>13</sup>C-NMR (75 MHz, CDCl<sub>3</sub>): δ 172.6 (4-CONH), 169.4 (C<sub>2</sub>), 162.2 (d, *J* = 245.9 Hz, C<sub>4''</sub>), 136.6, 136.3, 134.3 (d, *J* = 2.8 Hz, C<sub>1''</sub>), 130.5, 130.4, 129.7, 129.6, 129.0, 128.9, 127.1 (d, *J* = 9.2 Hz, C<sub>2''</sub>, C<sub>6''</sub>), 115.5 (d, *J* = 21.3 Hz, C<sub>3''</sub>, C<sub>5''</sub>) (Ar), 65.2 (C<sub>4</sub>), 56.2 (C<sub>2'</sub>), 50.2 (C<sub>3</sub>), 47.05 (NHCH<sub>2</sub>), 47.02 (CH<sub>2</sub>, <sup>i</sup>Bu), 43.1 (C<sub>1'</sub>), 40.3 (4-CH<sub>2</sub>), 38.1 (C<sub>3'</sub>), 28.3 (CH, <sup>i</sup>Bu), 20.34, 20.26 (CH<sub>3</sub>, <sup>i</sup>Bu). MS(ES)<sup>+</sup>: 502.32 [M+H]<sup>+</sup>. Exact mass calculated for C<sub>31</sub>H<sub>36</sub>FN<sub>3</sub>O<sub>2</sub>: 501.27916, found 501.28014.

**4*R,S*-Benzyl-4-[*N*-(*iso*-butyl)carbamoyl]-1-[(2'*S*-naphthylmethylamino-3'-phenyl)prop-1'-yl]-2-oxoazetidine (32,ab)**

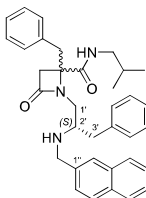

Syrup. Yield: 80% (From **12a,b** and 2-naphtaldehyde). Eluent: 9% to 50% of EtOAc in DCM. HPLC: *t<sub>R</sub>* = 6.83 (m, **32a**) y 7.07 (M, **32b**) min (gradient from 15% to 95% of A in 10 min). Ratio of diastereoisomers M:m, 1.1:1. <sup>1</sup>H-NMR (300 MHz, CDCl<sub>3</sub>, major diastereoisomer **32b**, from the mixture): δ 10.07 (t, *J* = 5.9 Hz, 1H, 4-CONH), 7.84 - 6.83 (m, 18H, Ar, 2'-NH), 3.96 (d, *J* = 14.3 Hz,

1H, 4-CH<sub>2</sub>), 3.63 (dd, *J* = 14.9, 5.7 Hz, 1H, H<sub>1'</sub>), 3.55 (d, *J* = 13.1 Hz, 1H, NHCH<sub>2</sub>), 3.47 (d, *J* = 13.1 Hz, 1H, NHCH<sub>2</sub>), 3.19 - 2.87 (m, 5H, CH<sub>2</sub>, <sup>i</sup>Bu, H<sub>1'</sub>, H<sub>3</sub>, 4-CH<sub>2</sub>), 2.80 - 2.51 (m, 4H, H<sub>2'</sub>, CH<sub>2</sub>, <sup>i</sup>Bu, H<sub>3'</sub>), 1.53 (m, 1H, CH, <sup>i</sup>Bu), 0.70 (d, *J* = 6.7 Hz, 3H, CH<sub>3</sub>, <sup>i</sup>Bu), 0.66 (d, *J* = 6.6 Hz, 3H, CH<sub>3</sub>, <sup>i</sup>Bu). <sup>13</sup>C-NMR (75 MHz, CDCl<sub>3</sub>): δ 172.5 (4-CONH), 169.4 (C<sub>2</sub>), 137.8, 136.3, 136.1, 133.3, 132.8, 130.2, 129.4, 128.9, 128.8, 128.6, 127.7, 127.6, 127.4, 127.0, 126.7, 126.4, 126.1, 126.0 (Ar), 65.2 (C<sub>4</sub>), 56.3 (C<sub>2'</sub>), 50.1 (C<sub>3</sub>), 48.1 (NHCH<sub>2</sub>), 46.9 (CH<sub>2</sub>, <sup>i</sup>Bu), 43.1 (C<sub>1'</sub>), 40.5 M (4-CH<sub>2</sub>), 38.4 (C<sub>3'</sub>), 28.2 (CH, <sup>i</sup>Bu), 20.21, 20.15 (CH<sub>3</sub>, <sup>i</sup>Bu). <sup>1</sup>H-NMR (300 MHz, CDCl<sub>3</sub>, minor diastereoisomer **32a**, from the mixture): δ 9.53 (t, *J* = 5.6 Hz, 1H, 4-CONH), 7.84 - 6.83 (m, 18H, Ar, 2'-NH), 3.86 (m, 3H, 4-CH<sub>2</sub>, H<sub>2'</sub>, NHCH<sub>2</sub>), 3.78 (d, *J* = 12.0 Hz, 1H, NHCH<sub>2</sub>), 3.27 (dd, *J* = 14.0, 3.0 Hz, 1H, H<sub>1'</sub>), 3.19 - 2.87 (m, 4H, H<sub>3</sub>, CH<sub>2</sub>, <sup>i</sup>Bu, 4-CH<sub>2</sub>), 2.80 - 2.51 (m, 6H, H<sub>3'</sub>), 1.96 - 1.87 (m, 2H, H<sub>1'</sub>, CH<sub>2</sub>, <sup>i</sup>Bu), 1.08 (m, 1H, CH, <sup>i</sup>Bu), 0.32 (d, *J* = 6.6 Hz, 3H, CH<sub>3</sub>, <sup>i</sup>Bu), 0.18 (d, *J* = 6.6 Hz, 3H, CH<sub>3</sub>, <sup>i</sup>Bu). <sup>13</sup>C-NMR (75 MHz, CDCl<sub>3</sub>): δ 171.4 (4-CONH), 167.7 (C<sub>2</sub>), 136.6, 136.4, 135.7, 133.5, 132.7, 130.2, 129.0, 128.8, 128.6, 128.4, 127.7, 127.4, 127.2, 126.9, 126.5, 126.3, 126.0 (Ar), 64.3 (C<sub>4</sub>), 55.2 (C<sub>2'</sub>), 53.2 (NHCH<sub>2</sub>), 49.8 (CH<sub>2</sub>, <sup>i</sup>Bu), 49.5 (C<sub>3</sub>), 46.4 (C<sub>1'</sub>), 41.0 (4-CH<sub>2</sub>), 38.6 (C<sub>3'</sub>), 27.7 (CH, <sup>i</sup>Bu), 19.75, 19.62 (CH<sub>3</sub>, <sup>i</sup>Bu). MS(ES)<sup>+</sup>: 534.46 [M+H]<sup>+</sup>. Exact mass calculated for C<sub>35</sub>H<sub>39</sub>N<sub>3</sub>O<sub>2</sub>: 533.30423, found 533.30655.

**4S-Benzyl-4-carboxy-3S-methyl-1-[(2'S-dibenzylamino-3'-phenyl)prop-1'-yl]-2-oxoazetidine (33)**

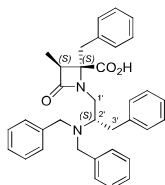

White solid, M.p.: 175.9 °C (EtOAc:hexane). Yield: 72% (From **1**). Eluent: 2% to 9% of MeOH in DCM. HPLC: t<sub>R</sub> = 6.84 min (gradient from 10% to 95% of A in 10 min). <sup>1</sup>H-NMR (400 MHz, CDCl<sub>3</sub>): δ 7.58 (s ancho, 4H, Ar), 7.44 (s ancho, 6H, Ar), 7.22 - 7.09 (m, 3H, Ar), 6.96 (m, 2H, Ar), 6.82 (m, 1H, Ar), 6.63 (m, 2H, Ar), 6.38 (m, 2H, Ar), 4.43 (s ancho, 1H, COOH), 4.06 (d, *J* = 14.3 Hz, 2H, NCH<sub>2</sub>), 3.86 (d, *J* = 13.1 Hz, 1H, 4-CH<sub>2</sub>), 3.82 (d, *J* = 12.8 Hz, 1H, 4-CH<sub>2</sub>), 3.60 (m, 2H, H<sub>1'</sub>, H<sub>2'</sub>), 3.16 (q, *J* = 7.5 Hz, 1H, H<sub>3</sub>), 3.13 (m, 1H, H<sub>3'</sub>), 2.70 (d, *J* = 14.3 Hz, NCH<sub>2</sub>), 2.69 (m, 1H, H<sub>1'</sub>), 2.46 (dd, *J* = 12.8, 10.9 Hz, 1H, H<sub>3'</sub>), 1.44 (d, *J* = 7.5 Hz, 3H, 3-CH<sub>3</sub>). <sup>13</sup>C-NMR (75 MHz, CDCl<sub>3</sub>): δ 174.1 (COOH), 173.3 (C<sub>2</sub>), 136.8, 134.1, 131.1, 130.5, 129.5, 129.4, 129.1, 128.9, 128.8, 128.7, 127.2, 126.7 (Ar), 72.6 (C<sub>4</sub>), 56.6 (C<sub>2'</sub>), 55.0 (NCH<sub>2</sub>), 42.0 (C<sub>1'</sub>), 40.4 (C<sub>3'</sub>, 4-CH<sub>2</sub>), 31.5 (C<sub>3'</sub>), 10.5 (3-CH<sub>3</sub>). MS(ES)<sup>+</sup>: 533.11 [M+H]<sup>+</sup>.

**Table 3S.** Yield and **a:b** ratio diastereoisomers of *N*-monobenzyamines **34-45**.

| Compound    | R <sup>1</sup> | R <sup>2</sup> | Ratio of diastereoisomers (a:b) | Yields | Yield of 2.17a |
|-------------|----------------|----------------|---------------------------------|--------|----------------|
| <b>11ab</b> | OMe            |                | 1:3.6                           | 40%    | 6%             |
| <b>13ab</b> | OMe            |                | 1:3.6                           | 30%    | 4%             |
| <b>14ab</b> | OMe            |                | 1:5.6                           | 30%    | 4%             |

|             |                    |                                                                                     |       |     |     |
|-------------|--------------------|-------------------------------------------------------------------------------------|-------|-----|-----|
| <b>15ab</b> | OMe                |    | 1:2   | 40% | 12% |
| <b>16ab</b> | OMe                |    | 1:4   | 45% | 9%  |
| <b>17ab</b> | OMe                |    | 1:9.5 | 36% | 9%  |
| <b>18ab</b> | NH <sup>i</sup> Bu |    | 1:1.5 | 28% | -   |
| <b>19ab</b> | NH <sup>i</sup> Bu |    | 1:1.1 | 80% | -   |
| <b>20ab</b> | NH <sup>i</sup> Bu |    | 1:2.6 | 32% | -   |
| <b>21ab</b> | NH <sup>i</sup> Bu |    | 1:2.4 | 27% | -   |
| <b>22ab</b> | NH <sup>i</sup> Bu |    | 1:2.9 | 30% | -   |
| <b>23ab</b> | NH <sup>i</sup> Bu |    | 1:2.7 | 19% | -   |
| <b>24ab</b> | NH <sup>i</sup> Bu |   | 1:2.5 | 46% | -   |
| <b>25ab</b> | NH <sup>i</sup> Bu |  | 1:5.7 | 24% | -   |
| <b>26ab</b> | NH <sup>i</sup> Bu |  | 1:1.5 | 22% | -   |
| <b>27ab</b> | NH <sup>i</sup> Bu |  | 1:1.1 | 24% | -   |
| <b>28ab</b> | NH <sup>i</sup> Bu |  | 1.2:1 | 16% | -   |
| <b>29ab</b> | NH <sup>i</sup> Bu |  | 1:1.9 | 70% | -   |
| <b>30ab</b> | NH <sup>i</sup> Bu |  | 1:1:1 | 10% | -   |
| <b>31ab</b> | NH <sup>i</sup> Bu |  | 1:1.1 | 80% | -   |

## Modeling Studies

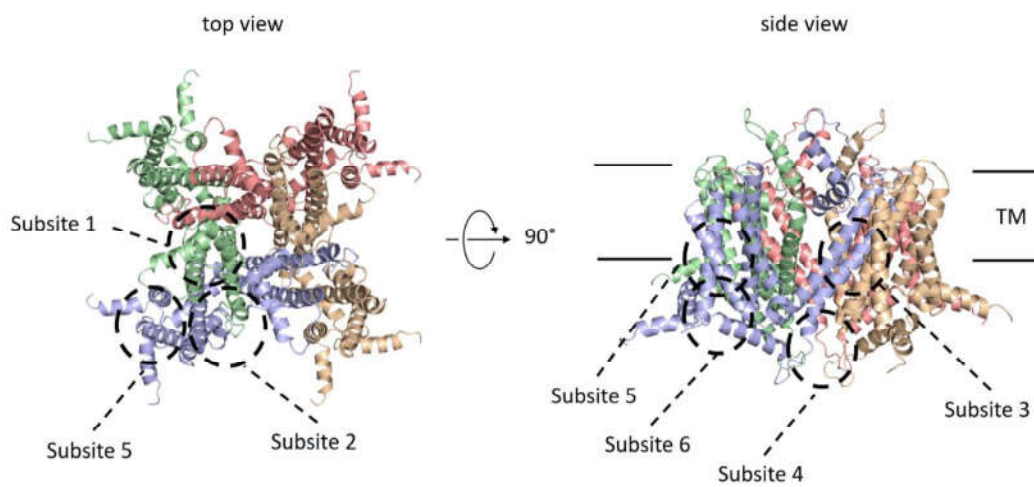

**Figure S1.** Comparative location of subsites 1-6 within the *rTRPM8* structure

TRPM8\_HUMAN  
 MSFRAARLSMRNRNDTLDSTRTLYSSASRSTDLSYSESDLVNFIQANFKKRECVFFTKD 60  
 TRPM8\_RAT  
 MSFEGARLSMRNRNGTLGSTRTLYSSVSRSTDVSYSESDLVNFIQANFKKRECVFFTRD 60  
 \*\*\*..\*\*\*\*\*.\*\*\*.\*.\*\*\*\*\*.\*\*\*\*\*:\*\*\*\*\*:\*\*\*\*\*:\*\*\*

TRPM8\_HUMAN  
 SKATENVCKCGYAQSQHMEGTQINQSEKWNKKHTKEFPTDAFGDIQFETLGKKGKYIRL 120  
 TRPM8\_RAT  
 SKAMESICKCGYAQSQHIEGTQINQNEKWNKKHTKEFPTDAFGDIQFETLGKKGKYLR 120  
 \*\*\* \*.:\*\*\*\*\*:\*\*\*\*\*.\*\*\*\*\*:\*\*\*\*\*:\*\*\*

TRPM8\_HUMAN  
 SCDDTDAEILYELLTQHWHLKTPNLVISVTGGAKNFALKPRMRKIFSRLIYIAQSKGAWIL 180  
 TRPM8\_RAT  
 SCDDTSETLYELLTQHWHLKTPNLVISVTGGAKNFALKPRMRKIFSRLIYIAQSKGAWIL 180  
 \*\*\*\*\*.\* \*\*\*\*\*

TRPM8\_HUMAN  
 TGGTHYGLMKYIGEVVRDNTISRSEENIVAIGIAAWGMVSNRDTLIRNCDAEGYFLAQY 240  
 TRPM8\_RAT  
 TGGTHYGLMKYIGEVVRDNTISRNSEENIVAIGIAAWGMVSNRDTLIRNCDDDEGHFSAQY 240  
 \*\*\*\*\*.\*\*\*\*\* \*\*:\* \*\*\*

TRPM8\_HUMAN  
 LMDDFTRDPLYILDNNHTHLLLVNDNGCHGHTVEAKLRNQLEKYISERTIQDSNYGGKIP 300  
 TRPM8\_RAT  
 IMDDFMRDPLYILDNNHTHLLLVNDNGCHGHTVEAKLRNQLEKYISERTSQDSNYGGKIP 300  
 :\*\*\*\*\* \*\*\*\*\*

TRPM8\_HUMAN  
 IVCFAQGGGKETLKAINTSIKNKIPCVVVEGSGQIADVIALVEVEDALTSSAVKEKLVR 360  
 TRPM8\_RAT  
 IVCFAQGGGRETLKAINTSVKSKIPCVVVEGSGQIADVIALVEVEDVLTSSMVKEKLVR 360  
 \*\*\*\*\*:\*\*\*\*\*:\*.\*\*\*\*\*.\*\*\*\* \*\*\*\*\*

TRPM8\_HUMAN  
 FLPRTVSRLPEEETESWIKWLKEILECSHLLTVIKMEEAGDEIVSNAISYALYKAFSTSE 420  
 TRPM8\_RAT  
 FLPRTVSRLPEEEIESWIKWLKEILESPHLLTVIKMEEAGDEVSSAISYALYKAFSTNE 420  
 \*\*\*\*\* \*\*\*\*\*.\*\*\*\*\*.\*\*\*.\*\*\*\*\*.\*

TRPM8\_HUMAN  
 QDKDNWNGQLKLLLEWNQLDLANDEIFTNDRRWESADLQEVMTALIKDRPKFVRLFLEN 480  
 TRPM8\_RAT  
 QDKDNWNGQLKLLLEWNQLDLASDEIFTNDRRWESADLQEVMTALIKDRPKFVRLFLEN 480  
 \*\*\*\*\*.\*\*\*\*\*

TRPM8\_HUMAN  
 GLNLRKFLTHDVLTELSNHFSTLVYRNQLIAKNSYNDALLTFVWKLVANFRRGFRKEDR 540  
 TRPM8\_RAT  
 GLNLQKFLTNEVLTELFSTHFSTLVYRNQLIAKNSYNDALLTFVWKLVANFRRSFWKEDR 540  
 \*\*\*:\*\*\*:\*\*\*\*\*.\*\*\*\*\*:\*\*\*\*\*.\* \*\*\*\*

TRPM8\_HUMAN  
 NGRDEMDIELHDVSPITRHPLQALFIWAILQNKKELSKVIWEQTRGCTLAALGASKLLKT 600  
 TRPM8\_RAT  
 SSREDLDELHDASLTTRHPLQALFIWAILQNKKELSKVIWEQTKGCTLAALGASKLLKT 600  
 .\*.::\*:\*\*\*.\* \*\*\*\*\*:\*\*\*\*\*

TRPM8\_HUMAN  
 LAKVNDINAAGESEELANEYETRAVELFTECYSSDEDLAEQLLVYSCEAWGGSNCLELA 660  
 TRPM8\_RAT  
 LAKVNDINAAGESEELANEYETRAVELFTECYSSDEDLAEQLLVYSCEAWGGSNCLELA 660  
 \*\*\*\*\*

```

TRPM8_HUMAN
VEATDQHFIAPGVQNFLSKQWYGEISRDTKNWKIILCLFIIPLVGCGFVSFRKKPVDKH          720
TRPM8_RAT
VEATDQHFIAPGVQNFLSKQWYGEISRDTKNWKIILCLFIIPLVGCGLVSFRRKKPIDKH          720
*****:*****:***
          Pre-S1          S1          S2

TRPM8_HUMAN
K[KLWYYYVAFFT]SP[FVVF[SWNVV]F]IAFLLLFAYVLL[MDFHSVPH]PPELVLYSLVFV[LFC]          780
TRPM8_RAT
K[KLWYYYVAFFT]SP[FVVF[SWNVV]F]IAFLLLFAYVLL[MDFHSVPH]TPELILYALVFV[LFC]          780
*****:*****:*****
          S2          S2-S3          S3          S4

TRPM8_HUMAN
[DEV]RQWY[N]G[VNYFT]D[LWNVMD]T[LGLFYFIAGIVFRLH]SSNKS[SLYSGRVIFCLDYIIFT]          840
TRPM8_RAT
[DEV]RQWY[N]G[VNYFT]D[LWNVMD]T[LGLFYFIAGIVFRLH]SSNKS[SLYSGRVIFCLDYIIFT]          840
*****:*****:*****
          S4          S5

TRPM8_HUMAN
[LRLIHIFTV]S[RN]LGP[KIIMLQRLIDVFFFLF]LFAVMMVAFGVARQGILR[QNEQR]WRWIF          900
TRPM8_RAT
[LRLIHIFTV]S[RN]LGP[KIIMLQRLIDVFFFLF]LFAVMMVAFGVARQGILR[QNEQR]WRWIF          900
*****:*****:*****
          PH          S6

TRPM8_HUMAN
[RSVIYEPYLA]MFGQVPSDVGTTTYDFAHCTFTGNESKPLCVELDEHNLPR[FPEWITIPLV]          960
TRPM8_RAT
[RSVIYEPYLA]MFGQVPSDVGTTTYDFAHCTFTGNESKPLCVELDEYNLPR[FPEWITIPLV]          960
*****:*****:*****
          S6          TRP

TRPM8_HUMAN
[CIYMLSTNILLVNL]VAMFGYTVGTQENND[QVW[KFQRYFLVQEY]CSR]NIPFPFIVFAY          1020
TRPM8_RAT
[CIYMLSTNILLVNL]VAMFGYTVGIVQENND[QVW[KFQRYFLVQEY]CNR]NIPFPFVVFAY          1020
*****:*****:*****

TRPM8_HUMAN
FYMVVKKCFKCCCKEKNMESSVCCFKNEDNETLAWEGVMKENYLVKINTKANDTSEEMRH          1080
TRPM8_RAT
FYMVVKKCFKCCCKEKNTESSACCFRNEDNETLAWEGVMKENYLVKINTKANDNAEEMRH          1080
*****:*****:*****

TRPM8_HUMAN          RFRQLDTKLNLDLKGLLKEIANKIK    1104
TRPM8_RAT            RFRQLDTKLNLDLKGLLKEIANKIK    1104
*****:*****:*****

```

**Figure S2. Sequence Alignment of rat and human TRPM8.** The asterisks denote absolute conserved residues, while colons and periods denote strong and weak similarity, respectively. Residues highlighted are critical for the sensitivity of TRPM8 to menthol (green), and icillin (yellow). Residue in blue or highlighted in blue are related to PIP2 binding. Boxes indicate TM secondary structures.

**Table S4.** Percentage of main docking solutions (and binding energy estimation in kcal/mol) obtained in molecular docking studies using Yasara. Truncated structure.

| Subsite | Channel Location     | TRPM8 without external loops         |             |
|---------|----------------------|--------------------------------------|-------------|
|         |                      | % solutions                          |             |
|         |                      | (estimated binding energy, Kcal/mol) |             |
|         |                      | <b>34</b>                            | <b>37</b>   |
| 1       | Pore, external tower | –                                    | –           |
| 2       | Pore, high S3-S4, S6 | 20.2 (8.46)                          | 17.1 (6.76) |
| 3       | Inner pore, S5S6, S5 | 16.4 (7.66)                          | 14.9 (5.96) |
| 4       | Pore, internal mouth | 9.2 (10.91)                          | 23 (8.85)   |
| 5       | Menthol bibding-site | 0                                    | 0           |

Interactions at the different, most populated TRPM8 subsites 1-4

| Subsite 1 (Extracelular towers)                                                   |                                                                                                                                                                                                                                                                                                                                                                                                                                                                                                                                                                                                                                                                                                                                                                                                                                                                                                                                                                                                                                                                                                                                                            |
|-----------------------------------------------------------------------------------|------------------------------------------------------------------------------------------------------------------------------------------------------------------------------------------------------------------------------------------------------------------------------------------------------------------------------------------------------------------------------------------------------------------------------------------------------------------------------------------------------------------------------------------------------------------------------------------------------------------------------------------------------------------------------------------------------------------------------------------------------------------------------------------------------------------------------------------------------------------------------------------------------------------------------------------------------------------------------------------------------------------------------------------------------------------------------------------------------------------------------------------------------------|
| COMPD. 34 -- comp78_towers_62.pdb                                                 | Contactos a 4 A                                                                                                                                                                                                                                                                                                                                                                                                                                                                                                                                                                                                                                                                                                                                                                                                                                                                                                                                                                                                                                                                                                                                            |
| 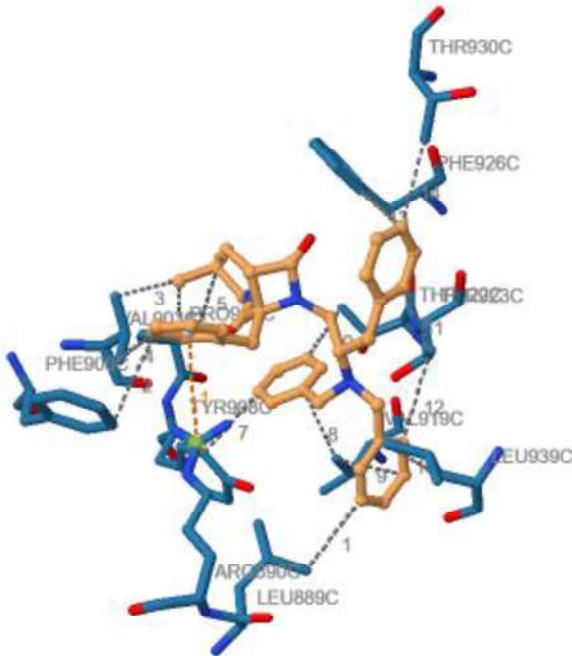 | <p>Contact analysis<br/>=====</p> <p>Residue LIG Z 1 :</p> <p>Contacts to Residue GLU B 942 :<br/>25</p> <p>Contacts to Residue ARG B 950 :<br/>22</p> <p>Contacts to Residue ARG C 885 :<br/>11</p> <p>Contacts to Residue LEU C 889 :<br/>20</p> <p>Contacts to Residue ARG C 890 :<br/>48</p> <p>Contacts to Residue ILE C 899 : 7</p> <p>Contacts to Residue PHE C 900 : 6</p> <p>Contacts to Residue VAL C 903 :<br/>73</p> <p>Contacts to Residue PRO C 907 :<br/>49</p> <p>Contacts to Residue TYR C 908 :<br/>16</p> <p>Contacts to Residue MET C 911 :<br/>21</p> <p>Contacts to Residue PRO C 916 : 1</p> <p>Contacts to Residue VAL C 919 :<br/>68</p> <p>Contacts to Residue ASP C 920 :<br/>21</p> <p>Contacts to Residue THR C 922 :<br/>19</p> <p>Contacts to Residue THR C 923 :<br/>133</p> <p>Contacts to Residue PHE C 926 :<br/>25</p> <p>Contacts to Residue SER C 927 :<br/>12</p> <p>Contacts to Residue THR C 930 :<br/>17</p> <p>Contacts to Residue LYS C 937 : 4</p> <p>Contacts to Residue LEU C 939 :<br/>69</p> <p>Contacts to Residue CYS C 940 : 1</p> <p>Contacts to Residue VAL C 941 : 1</p> <p>23 contacts listed.</p> |
| PLIP hydrophobic interactions                                                     |                                                                                                                                                                                                                                                                                                                                                                                                                                                                                                                                                                                                                                                                                                                                                                                                                                                                                                                                                                                                                                                                                                                                                            |

| ▼ Hydrophobic Interactions **** |         |     |          |             |              |
|---------------------------------|---------|-----|----------|-------------|--------------|
| Index                           | Residue | AA  | Distance | Ligand Atom | Protein Atom |
| 1                               | 889C    | LEU | 3.67     | 10562       | 6703         |
| 2                               | 900C    | PHE | 3.99     | 10578       | 6818         |
| 3                               | 903C    | VAL | 3.51     | 10560       | 6842         |
| 4                               | 903C    | VAL | 3.16     | 10577       | 6843         |
| 5                               | 907C    | PRO | 3.69     | 10559       | 6877         |
| 6                               | 907C    | PRO | 3.56     | 10560       | 6878         |
| 7                               | 908C    | TYR | 3.45     | 10569       | 6888         |
| 8                               | 919C    | VAL | 3.71     | 10552       | 6970         |
| 9                               | 919C    | VAL | 3.39     | 10564       | 6970         |
| 10                              | 922C    | THR | 3.79     | 10567       | 6992         |
| 11                              | 923C    | THR | 3.03     | 10571       | 6999         |
| 12                              | 923C    | THR | 3.74     | 10565       | 6999         |
| 13                              | 926C    | PHE | 3.57     | 10573       | 7027         |
| 14                              | 930C    | THR | 3.39     | 10573       | 7059         |
| 15                              | 939C    | LEU | 3.51     | 10550       | 7124         |

| PLIP HBonds interaction // Pi- Stacking // Pi-Pi |         |     |          |        |                  |              |                                          |
|--------------------------------------------------|---------|-----|----------|--------|------------------|--------------|------------------------------------------|
| ▼ π-Cation Interactions ****                     |         |     |          |        |                  |              |                                          |
| Index                                            | Residue | AA  | Distance | Offset | Protein charged? | Ligand Group | Ligand Atoms                             |
| 1                                                | 890C    | ARG | 4.11     | 1.33   | ✓                | Aromatic     | 10553, 10576, 10577, 10578, 10579, 10580 |

| Yasara Interactions                                                            | PiPi / CationPi / ionic                                                        |
|--------------------------------------------------------------------------------|--------------------------------------------------------------------------------|
| Hydrophobic Interaction Analysis<br>=====                                      | PiPi Interaction Analysis<br>=====                                             |
| Residue LEU C 889 :<br>to Residue LIG Z 1 : 1 interactions with strength 0.277 | Residue PHE C 900 :<br>to Residue LIG Z 1 : 2 interactions with strength 1.161 |
| Residue PHE C 900 :<br>to Residue LIG Z 1 : 1 interactions with strength 0.971 | Residue PHE C 926 :<br>to Residue LIG Z 1 : 1 interactions with strength 0.480 |
| Residue VAL C 903 :<br>to Residue LIG Z 1 : 1 interactions with strength 0.025 | 2 interactions listed.                                                         |
| Residue PRO C 907 :<br>to Residue LIG Z 1 : 3 interactions with strength 0.580 |                                                                                |
| Residue TYR C 908 :<br>to Residue LIG Z 1 : 1 interactions with strength 0.109 | CationPi Interaction Analysis<br>=====                                         |
| Residue VAL C 919 :<br>to Residue LIG Z 1 : 4 interactions with strength 2.352 | 0 interactions listed.                                                         |
| Residue THR C 922 :<br>to Residue LIG Z 1 : 1 interactions with strength 0.507 |                                                                                |
| Residue THR C 923 :<br>to Residue LIG Z 1 : 1 interactions with strength 0.423 | Ionic Interaction Analysis<br>=====                                            |
| Residue PHE C 926 :<br>to Residue LIG Z 1 : 2 interactions with strength 0.925 | 0 interactions listed.                                                         |
| Residue LEU C 939 :<br>to Residue LIG Z 1 : 4 interactions with strength 1.085 |                                                                                |
| Residue LIG Z 1 :<br>in Residue LIG Z 1 : 6 interactions with strength 1.549   |                                                                                |
| 11 interactions listed.                                                        |                                                                                |
| Hydrogen Bond Analysis                                                         |                                                                                |

|                                 |  |
|---------------------------------|--|
| Hydrogen Bond Analysis<br>===== |  |
|---------------------------------|--|

| Subsite 1 (Extracellular towers)                                                   |                                                                                                                                                                                                                                                                                                                                                                                                                                                                                                                                                                                                                                                                                                                                                                                                                                                                                                                      |
|------------------------------------------------------------------------------------|----------------------------------------------------------------------------------------------------------------------------------------------------------------------------------------------------------------------------------------------------------------------------------------------------------------------------------------------------------------------------------------------------------------------------------------------------------------------------------------------------------------------------------------------------------------------------------------------------------------------------------------------------------------------------------------------------------------------------------------------------------------------------------------------------------------------------------------------------------------------------------------------------------------------|
| COMPD. 35 – 79trans_towers_121.pdb                                                 | Contactos a 4 A                                                                                                                                                                                                                                                                                                                                                                                                                                                                                                                                                                                                                                                                                                                                                                                                                                                                                                      |
| 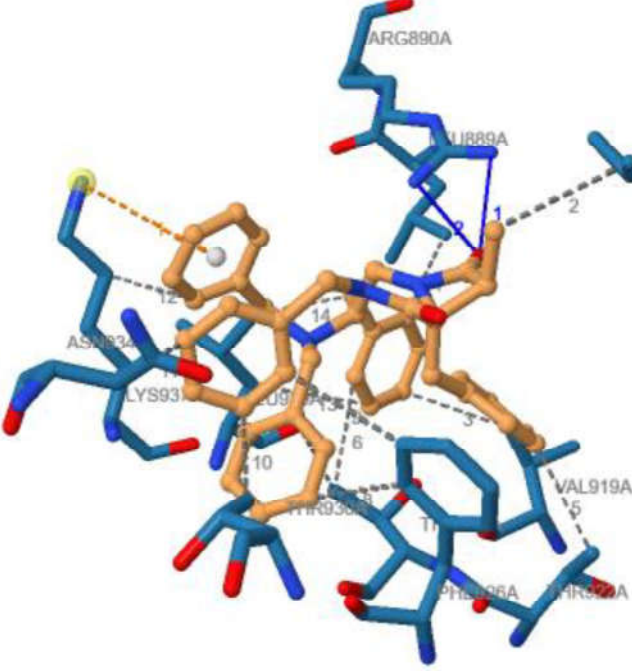 | Contact analysis<br>=====<br>Residue LIG Z 1 :<br>Contacts to Residue ARG<br>A 885 : 6<br>Contacts to Residue LEU A 889<br>: 27<br>Contacts to Residue ARG<br>A 890 : 34<br>Contacts to Residue VAL A 903<br>: 19<br>Contacts to Residue TYR A 908<br>: 4<br>Contacts to Residue MET<br>A 911 : 13<br>Contacts to Residue VAL A 919<br>: 40<br>Contacts to Residue ASP A 920<br>: 2<br>Contacts to Residue THR A 922<br>: 23<br>Contacts to Residue THR A 923<br>: 87<br>Contacts to Residue PHE A 926<br>: 54<br>Contacts to Residue SER A 927<br>: 35<br>Contacts to Residue THR A 930<br>: 25<br>Contacts to Residue ASN<br>A 934 : 22<br>Contacts to Residue GLU<br>A 935 : 28<br>Contacts to Residue SER A 936<br>: 30<br>Contacts to Residue LYS A 937<br>: 73<br>Contacts to Residue PRO<br>A 938 : 1<br>Contacts to Residue LEU A 939<br>: 74<br>Contacts to Residue GLU<br>D 942 : 1<br>20 contacts listed. |
| PLIP hydrophobic interactions                                                      |                                                                                                                                                                                                                                                                                                                                                                                                                                                                                                                                                                                                                                                                                                                                                                                                                                                                                                                      |

|                                 |         |     |          |             |  |  |              |  |  |  |
|---------------------------------|---------|-----|----------|-------------|--|--|--------------|--|--|--|
| ▼ Hydrophobic Interactions .... |         |     |          |             |  |  |              |  |  |  |
| Index                           | Residue | AA  | Distance | Ligand Atom |  |  | Protein Atom |  |  |  |
| 1                               | 889A    | LEU | 3.40     | 10571       |  |  | 1436         |  |  |  |
| 2                               | 903A    | VAL | 3.82     | 10544       |  |  | 1574         |  |  |  |
| 3                               | 919A    | VAL | 3.23     | 10569       |  |  | 1702         |  |  |  |
| 4                               | 919A    | VAL | 3.69     | 10575       |  |  | 1702         |  |  |  |
| 5                               | 922A    | THR | 3.21     | 10573       |  |  | 1724         |  |  |  |
| 6                               | 923A    | THR | 3.74     | 10567       |  |  | 1731         |  |  |  |
| 7                               | 923A    | THR | 3.55     | 10550       |  |  | 1731         |  |  |  |
| 8                               | 926A    | PHE | 3.59     | 10558       |  |  | 1759         |  |  |  |
| 9                               | 926A    | PHE | 3.73     | 10577       |  |  | 1761         |  |  |  |
| 10                              | 930A    | THR | 3.14     | 10578       |  |  | 1791         |  |  |  |
| 11                              | 934A    | ASN | 3.26     | 10580       |  |  | 1817         |  |  |  |
| 12                              | 937A    | LYS | 3.35     | 10562       |  |  | 1842         |  |  |  |
| 13                              | 939A    | LEU | 3.54     | 10568       |  |  | 1856         |  |  |  |
| 14                              | 939A    | LEU | 3.19     | 10547       |  |  | 1858         |  |  |  |

|                                                  |         |     |                 |                 |                |                   |               |               |                  |  |
|--------------------------------------------------|---------|-----|-----------------|-----------------|----------------|-------------------|---------------|---------------|------------------|--|
| PLIP HBonds interaction // Pi- Stacking // Pi-Pi |         |     |                 |                 |                |                   |               |               |                  |  |
| ▼ Hydrogen Bonds ---                             |         |     |                 |                 |                |                   |               |               |                  |  |
| Index                                            | Residue | AA  | Distance<br>H-A | Distance<br>D-A | Donor<br>Angle | Protein<br>donor? | Side<br>chain | Donor<br>Atom | Acceptor<br>Atom |  |
| 1                                                | 890A    | ARG | 2.60            | 3.45            | 145.85         | ✓                 | ✓             | 1446<br>[Ng+] | 10582<br>[O2]    |  |
| 2                                                | 890A    | ARG | 2.30            | 3.23            | 157.68         | ✓                 | ✓             | 1447<br>[Ng+] | 10582<br>[O2]    |  |

|                              |         |     |          |        |                     |                 |                                             |  |  |  |
|------------------------------|---------|-----|----------|--------|---------------------|-----------------|---------------------------------------------|--|--|--|
| ▼ π-Cation Interactions .... |         |     |          |        |                     |                 |                                             |  |  |  |
| Index                        | Residue | AA  | Distance | Offset | Protein<br>charged? | Ligand<br>Group | Ligand Atoms                                |  |  |  |
| 1                            | 937A    | LYS | 4.82     | 1.11   | ✓                   | Aromatic        | 10552, 10562, 10563,<br>10564, 10565, 10566 |  |  |  |

|                                                         |  |  |  |  |  |  |                                  |  |  |  |  |
|---------------------------------------------------------|--|--|--|--|--|--|----------------------------------|--|--|--|--|
| Yasara Interactions                                     |  |  |  |  |  |  | PiPi / CationPi / ionic          |  |  |  |  |
| Hydrophobic Interaction Analysis                        |  |  |  |  |  |  | PiPi Interaction Analysis        |  |  |  |  |
| =====                                                   |  |  |  |  |  |  | =====                            |  |  |  |  |
| Residue VAL A 903 :                                     |  |  |  |  |  |  | Residue PHE A 926 :              |  |  |  |  |
| to Residue LIG Z 1 : 1 interactions with strength 0.644 |  |  |  |  |  |  | to Residue LIG Z 1 : 1           |  |  |  |  |
| Residue MET A 911 :                                     |  |  |  |  |  |  | interactions with strength 0.419 |  |  |  |  |
| to Residue LIG Z 1 : 1 interactions with strength 0.585 |  |  |  |  |  |  | Residue LIG Z 1 :                |  |  |  |  |
| Residue VAL A 919 :                                     |  |  |  |  |  |  | in Residue LIG Z 1: 12           |  |  |  |  |
| to Residue LIG Z 1 : 2 interactions with strength 0.997 |  |  |  |  |  |  | interactions with strength 9.269 |  |  |  |  |
| Residue THR A 923 :                                     |  |  |  |  |  |  | 2 interactions listed.           |  |  |  |  |
| to Residue LIG Z 1 : 8 interactions with strength 2.953 |  |  |  |  |  |  |                                  |  |  |  |  |
| Residue PHE A 926 :                                     |  |  |  |  |  |  | CationPi Interaction Analysis    |  |  |  |  |
| to Residue LIG Z 1 : 3 interactions with strength 1.543 |  |  |  |  |  |  | =====                            |  |  |  |  |
| Residue LYS A 937 :                                     |  |  |  |  |  |  | ===                              |  |  |  |  |
| to Residue LIG Z 1 : 2 interactions with strength 0.277 |  |  |  |  |  |  | Residue LYS A 937 :              |  |  |  |  |
| Residue LEU A 939 :                                     |  |  |  |  |  |  | to Residue LIG Z 1 : 2           |  |  |  |  |
| to Residue LIG Z 1 : 2 interactions with strength 0.178 |  |  |  |  |  |  | interactions with strength 0.998 |  |  |  |  |
| Residue LIG Z 1 :                                       |  |  |  |  |  |  | 1 interaction listed.            |  |  |  |  |
| in Residue LIG Z 1 : 9 interactions with strength 5.041 |  |  |  |  |  |  |                                  |  |  |  |  |
| 8 interactions listed.                                  |  |  |  |  |  |  | Ionic Interaction Analysis       |  |  |  |  |

|                                                                                                                 |                        |
|-----------------------------------------------------------------------------------------------------------------|------------------------|
|                                                                                                                 | =====                  |
|                                                                                                                 | 0 interactions listed. |
| <b>Hydrogen Bond Analysis</b>                                                                                   |                        |
| Hydrogen Bond Analysis                                                                                          |                        |
| =====                                                                                                           |                        |
| Residue LIG Z 1 :                                                                                               |                        |
| Atom O LIG 1 Z accepts a bond from NH2 ARG 890 A, O - H distance is 2.29 A, bond energy is 3.29 kcal/mol.       |                        |
| 1 hydrogen bonds better than 1.49 kcal/mol, 1 accepted, 0 donated. Total hydrogen bond energy is 3.29 kcal/mol. |                        |

| <b>Subsite 1 (Extracellular towers)</b>                                            |                                    |
|------------------------------------------------------------------------------------|------------------------------------|
| <b>COMP. 37 -- comp55_towers_6.pdb</b>                                             | <b>Contactos a 4 A</b>             |
| 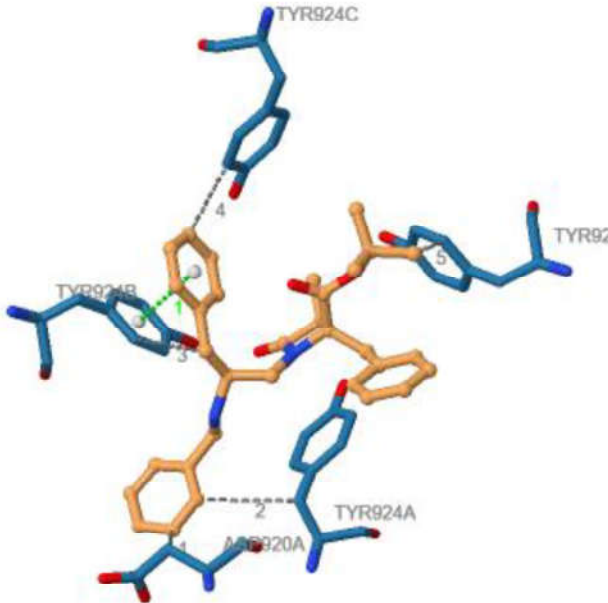 | Contact analysis                   |
|                                                                                    | =====                              |
|                                                                                    | Residue LIG Z 1 :                  |
|                                                                                    | Contacts to Residue ASP A 920 : 23 |
|                                                                                    | Contacts to Residue SER A 921 : 24 |
|                                                                                    | Contacts to Residue THR A 923 : 1  |
|                                                                                    | Contacts to Residue TYR A 924 : 88 |
|                                                                                    | Contacts to Residue ASP A 925 : 23 |
|                                                                                    | Contacts to Residue PRO A 938 : 8  |
|                                                                                    | Contacts to Residue LEU A 939 : 3  |
|                                                                                    | Contacts to Residue CYS A 940 : 7  |
|                                                                                    | Contacts to Residue ASP B 920 : 1  |
|                                                                                    | Contacts to Residue SER B 921 : 25 |
|                                                                                    | Contacts to Residue TYR B 924 : 81 |
|                                                                                    | Contacts to Residue ASP B 925 : 38 |
|                                                                                    | Contacts to Residue HIS B 928 : 19 |
|                                                                                    | Contacts to Residue SER C 921 : 4  |
|                                                                                    | Contacts to Residue TYR C 924 : 17 |
|                                                                                    | Contacts to Residue ASP C 925 : 6  |
|                                                                                    | Contacts to Residue SER D 917 : 12 |

|                                                                                                                                                                                                                                                                                                                                                                                                                                                                                                                                                                                                                                                                                                      | Contacts to Residue ASP D 920 : 9<br>Contacts to Residue SER D 921 : 62<br>Contacts to Residue TYR D 924 : 47<br>Contacts to Residue ASP D 925 : 14<br>21 contacts listed.                                                                                                                                                                                                                                   |       |          |             |              |               |                                          |               |              |     |      |       |      |       |      |     |                                          |       |      |   |      |     |      |       |      |   |      |     |      |       |      |   |      |     |      |       |      |
|------------------------------------------------------------------------------------------------------------------------------------------------------------------------------------------------------------------------------------------------------------------------------------------------------------------------------------------------------------------------------------------------------------------------------------------------------------------------------------------------------------------------------------------------------------------------------------------------------------------------------------------------------------------------------------------------------|--------------------------------------------------------------------------------------------------------------------------------------------------------------------------------------------------------------------------------------------------------------------------------------------------------------------------------------------------------------------------------------------------------------|-------|----------|-------------|--------------|---------------|------------------------------------------|---------------|--------------|-----|------|-------|------|-------|------|-----|------------------------------------------|-------|------|---|------|-----|------|-------|------|---|------|-----|------|-------|------|---|------|-----|------|-------|------|
| PLIP hydrophobic interactions                                                                                                                                                                                                                                                                                                                                                                                                                                                                                                                                                                                                                                                                        |                                                                                                                                                                                                                                                                                                                                                                                                              |       |          |             |              |               |                                          |               |              |     |      |       |      |       |      |     |                                          |       |      |   |      |     |      |       |      |   |      |     |      |       |      |   |      |     |      |       |      |
| ▼ Hydrophobic Interactions ****                                                                                                                                                                                                                                                                                                                                                                                                                                                                                                                                                                                                                                                                      |                                                                                                                                                                                                                                                                                                                                                                                                              |       |          |             |              |               |                                          |               |              |     |      |       |      |       |      |     |                                          |       |      |   |      |     |      |       |      |   |      |     |      |       |      |   |      |     |      |       |      |
| <table><tr><th>Index</th><th>Residue</th><th>AA</th><th>Distance</th><th>Ligand Atom</th><th>Protein Atom</th></tr><tr><td>1</td><td>920A</td><td>ASP</td><td>3.64</td><td>10557</td><td>1708</td></tr><tr><td>2</td><td>924A</td><td>TYR</td><td>3.63</td><td>10556</td><td>1736</td></tr><tr><td>3</td><td>924B</td><td>TYR</td><td>3.53</td><td>10546</td><td>4373</td></tr><tr><td>4</td><td>924C</td><td>TYR</td><td>3.73</td><td>10563</td><td>7009</td></tr><tr><td>5</td><td>924D</td><td>TYR</td><td>3.24</td><td>10571</td><td>9641</td></tr></table>                                                                                                                                      |                                                                                                                                                                                                                                                                                                                                                                                                              | Index | Residue  | AA          | Distance     | Ligand Atom   | Protein Atom                             | 1             | 920A         | ASP | 3.64 | 10557 | 1708 | 2     | 924A | TYR | 3.63                                     | 10556 | 1736 | 3 | 924B | TYR | 3.53 | 10546 | 4373 | 4 | 924C | TYR | 3.73 | 10563 | 7009 | 5 | 924D | TYR | 3.24 | 10571 | 9641 |
| Index                                                                                                                                                                                                                                                                                                                                                                                                                                                                                                                                                                                                                                                                                                | Residue                                                                                                                                                                                                                                                                                                                                                                                                      | AA    | Distance | Ligand Atom | Protein Atom |               |                                          |               |              |     |      |       |      |       |      |     |                                          |       |      |   |      |     |      |       |      |   |      |     |      |       |      |   |      |     |      |       |      |
| 1                                                                                                                                                                                                                                                                                                                                                                                                                                                                                                                                                                                                                                                                                                    | 920A                                                                                                                                                                                                                                                                                                                                                                                                         | ASP   | 3.64     | 10557       | 1708         |               |                                          |               |              |     |      |       |      |       |      |     |                                          |       |      |   |      |     |      |       |      |   |      |     |      |       |      |   |      |     |      |       |      |
| 2                                                                                                                                                                                                                                                                                                                                                                                                                                                                                                                                                                                                                                                                                                    | 924A                                                                                                                                                                                                                                                                                                                                                                                                         | TYR   | 3.63     | 10556       | 1736         |               |                                          |               |              |     |      |       |      |       |      |     |                                          |       |      |   |      |     |      |       |      |   |      |     |      |       |      |   |      |     |      |       |      |
| 3                                                                                                                                                                                                                                                                                                                                                                                                                                                                                                                                                                                                                                                                                                    | 924B                                                                                                                                                                                                                                                                                                                                                                                                         | TYR   | 3.53     | 10546       | 4373         |               |                                          |               |              |     |      |       |      |       |      |     |                                          |       |      |   |      |     |      |       |      |   |      |     |      |       |      |   |      |     |      |       |      |
| 4                                                                                                                                                                                                                                                                                                                                                                                                                                                                                                                                                                                                                                                                                                    | 924C                                                                                                                                                                                                                                                                                                                                                                                                         | TYR   | 3.73     | 10563       | 7009         |               |                                          |               |              |     |      |       |      |       |      |     |                                          |       |      |   |      |     |      |       |      |   |      |     |      |       |      |   |      |     |      |       |      |
| 5                                                                                                                                                                                                                                                                                                                                                                                                                                                                                                                                                                                                                                                                                                    | 924D                                                                                                                                                                                                                                                                                                                                                                                                         | TYR   | 3.24     | 10571       | 9641         |               |                                          |               |              |     |      |       |      |       |      |     |                                          |       |      |   |      |     |      |       |      |   |      |     |      |       |      |   |      |     |      |       |      |
| PLIP HBonds interaction // Pi- Stacking // Pi-Pi                                                                                                                                                                                                                                                                                                                                                                                                                                                                                                                                                                                                                                                     |                                                                                                                                                                                                                                                                                                                                                                                                              |       |          |             |              |               |                                          |               |              |     |      |       |      |       |      |     |                                          |       |      |   |      |     |      |       |      |   |      |     |      |       |      |   |      |     |      |       |      |
| ▼ π-Stacking ****                                                                                                                                                                                                                                                                                                                                                                                                                                                                                                                                                                                                                                                                                    |                                                                                                                                                                                                                                                                                                                                                                                                              |       |          |             |              |               |                                          |               |              |     |      |       |      |       |      |     |                                          |       |      |   |      |     |      |       |      |   |      |     |      |       |      |   |      |     |      |       |      |
| <table><tr><th>Index</th><th>Residue</th><th>AA</th><th>Distance</th><th>Angle</th><th>Offset</th><th>Stacking Type</th><th>Ligand Atoms</th></tr><tr><td>1</td><td>924B</td><td>TYR</td><td>3.98</td><td>26.13</td><td>1.48</td><td>P</td><td>10548, 10561, 10562, 10563, 10564, 10565</td></tr></table>                                                                                                                                                                                                                                                                                                                                                                                            |                                                                                                                                                                                                                                                                                                                                                                                                              | Index | Residue  | AA          | Distance     | Angle         | Offset                                   | Stacking Type | Ligand Atoms | 1   | 924B | TYR   | 3.98 | 26.13 | 1.48 | P   | 10548, 10561, 10562, 10563, 10564, 10565 |       |      |   |      |     |      |       |      |   |      |     |      |       |      |   |      |     |      |       |      |
| Index                                                                                                                                                                                                                                                                                                                                                                                                                                                                                                                                                                                                                                                                                                | Residue                                                                                                                                                                                                                                                                                                                                                                                                      | AA    | Distance | Angle       | Offset       | Stacking Type | Ligand Atoms                             |               |              |     |      |       |      |       |      |     |                                          |       |      |   |      |     |      |       |      |   |      |     |      |       |      |   |      |     |      |       |      |
| 1                                                                                                                                                                                                                                                                                                                                                                                                                                                                                                                                                                                                                                                                                                    | 924B                                                                                                                                                                                                                                                                                                                                                                                                         | TYR   | 3.98     | 26.13       | 1.48         | P             | 10548, 10561, 10562, 10563, 10564, 10565 |               |              |     |      |       |      |       |      |     |                                          |       |      |   |      |     |      |       |      |   |      |     |      |       |      |   |      |     |      |       |      |
| Yasara Interactions                                                                                                                                                                                                                                                                                                                                                                                                                                                                                                                                                                                                                                                                                  | PiPi / CationPi / ionic                                                                                                                                                                                                                                                                                                                                                                                      |       |          |             |              |               |                                          |               |              |     |      |       |      |       |      |     |                                          |       |      |   |      |     |      |       |      |   |      |     |      |       |      |   |      |     |      |       |      |
| Hydrophobic Interaction Analysis<br>=====                                                                                                                                                                                                                                                                                                                                                                                                                                                                                                                                                                                                                                                            | PiPi Interaction Analysis<br>=====                                                                                                                                                                                                                                                                                                                                                                           |       |          |             |              |               |                                          |               |              |     |      |       |      |       |      |     |                                          |       |      |   |      |     |      |       |      |   |      |     |      |       |      |   |      |     |      |       |      |
| Residue ASP A 920 :<br>to Residue LIG Z 1 : 1 interactions with strength 0.278<br>Residue TYR A 924 :<br>to Residue LIG Z 1 : 6 interactions with strength 1.916<br>Residue SER B 921 :<br>to Residue LIG Z 1 : 1 interactions with strength 0.310<br>Residue TYR B 924 :<br>to Residue LIG Z 1 : 5 interactions with strength 1.193<br>Residue HIS B 928 :<br>to Residue LIG Z 1 : 1 interactions with strength 0.057<br>Residue TYR C 924 :<br>to Residue LIG Z 1 : 2 interactions with strength 1.386<br>Residue SER D 921 :<br>to Residue LIG Z 1 : 1 interactions with strength 0.466<br>Residue LIG Z 1 :<br>in Residue LIG Z 1 : 4 interactions with strength 1.237<br>8 interactions listed. | Residue TYR A 924 :<br>to Residue LIG Z 1 : 2 interactions with strength 0.594<br>Residue TYR B 924 :<br>to Residue LIG Z 1 : 1 interactions with strength 0.156<br>Residue HIS B 928 :<br>to Residue LIG Z 1 : 1 interactions with strength 0.297<br>Residue TYR D 924 :<br>to Residue LIG Z 1 : 1 interactions with strength 0.075<br>4 interactions listed.<br><br>CationPi Interaction Analysis<br>===== |       |          |             |              |               |                                          |               |              |     |      |       |      |       |      |     |                                          |       |      |   |      |     |      |       |      |   |      |     |      |       |      |   |      |     |      |       |      |
|                                                                                                                                                                                                                                                                                                                                                                                                                                                                                                                                                                                                                                                                                                      | ==                                                                                                                                                                                                                                                                                                                                                                                                           |       |          |             |              |               |                                          |               |              |     |      |       |      |       |      |     |                                          |       |      |   |      |     |      |       |      |   |      |     |      |       |      |   |      |     |      |       |      |
|                                                                                                                                                                                                                                                                                                                                                                                                                                                                                                                                                                                                                                                                                                      | 0 interactions listed.                                                                                                                                                                                                                                                                                                                                                                                       |       |          |             |              |               |                                          |               |              |     |      |       |      |       |      |     |                                          |       |      |   |      |     |      |       |      |   |      |     |      |       |      |   |      |     |      |       |      |
|                                                                                                                                                                                                                                                                                                                                                                                                                                                                                                                                                                                                                                                                                                      | Ionic Interaction Analysis<br>=====                                                                                                                                                                                                                                                                                                                                                                          |       |          |             |              |               |                                          |               |              |     |      |       |      |       |      |     |                                          |       |      |   |      |     |      |       |      |   |      |     |      |       |      |   |      |     |      |       |      |
|                                                                                                                                                                                                                                                                                                                                                                                                                                                                                                                                                                                                                                                                                                      | 0 interactions listed.                                                                                                                                                                                                                                                                                                                                                                                       |       |          |             |              |               |                                          |               |              |     |      |       |      |       |      |     |                                          |       |      |   |      |     |      |       |      |   |      |     |      |       |      |   |      |     |      |       |      |
| Hydrogen Bond Analysis                                                                                                                                                                                                                                                                                                                                                                                                                                                                                                                                                                                                                                                                               |                                                                                                                                                                                                                                                                                                                                                                                                              |       |          |             |              |               |                                          |               |              |     |      |       |      |       |      |     |                                          |       |      |   |      |     |      |       |      |   |      |     |      |       |      |   |      |     |      |       |      |



| Index | Residue | AA  | Distance | Ligand Atom | Protein Atom |
|-------|---------|-----|----------|-------------|--------------|
| 1     | 808D    | TYR | 3.89     | 10568       | 8666         |
| 2     | 808D    | TYR | 3.30     | 10565       | 8671         |
| 3     | 811D    | ALA | 3.32     | 10567       | 8697         |
| 4     | 815D    | PHE | 4.00     | 10541       | 8725         |
| 5     | 831D    | ILE | 3.46     | 10569       | 8851         |
| 6     | 831D    | ILE | 3.17     | 10579       | 8853         |
| 7     | 831D    | ILE | 3.83     | 10568       | 8852         |
| 8     | 949C    | PRO | 3.31     | 10577       | 7208         |
| 9     | 949C    | PRO | 3.34     | 10560       | 7207         |
| 10    | 951C    | PHE | 3.38     | 10579       | 7227         |
| 11    | 951C    | PHE | 3.12     | 10570       | 7229         |

PLIP HBonds interaction // Pi- Stacking // Pi-Pi

▼ π-Stacking

| Index | Residue | AA    | Distance                      | Angle | Offset | Stacking Type | Ligand Atoms                             |
|-------|---------|-------|-------------------------------|-------|--------|---------------|------------------------------------------|
| 1     | 808D    | Amino | Distance between ring centers |       |        |               | 10552, 10566, 10567, 10568, 10569, 10570 |
| 2     | 815D    | PHE   | 4.44                          | 26.91 | 0.93   | P             | 10553, 10576, 10577, 10578, 10579, 10580 |
| 3     | 954C    | TRP   | 3.85                          | 6.63  | 1.32   | P             | 10550, 10561, 10562, 10563, 10564, 10565 |
| 4     | 954C    | TRP   | 3.63                          | 5.85  | 0.70   | P             | 10550, 10561, 10562, 10563, 10564, 10565 |

Yasara Interactions

Hydrophobic Interaction Analysis  
=====

Residue PHE C 951 :  
to Residue LIG Z 1 : 3 interactions with strength 0.798  
Residue TRP C 954 :  
to Residue LIG Z 1 : 16 interactions with strength 8.442  
Residue TYR D 808 :  
to Residue LIG Z 1 : 3 interactions with strength 1.328  
Residue PHE D 815 :  
to Residue LIG Z 1 : 3 interactions with strength 2.696  
Residue ILE D 831 :  
to Residue LIG Z 1 : 4 interactions with strength 1.093  
Residue LIG Z 1 :  
in Residue LIG Z 1 : 8 interactions with strength 5.247  
6 interactions listed.

PiPi / CationPi / ionic

PiPi Interaction Analysis  
=====

Residue PHE C 951 :  
to Residue LIG Z 1 : 1  
interactions with strength 1.000  
Residue PHE D 807 :  
to Residue LIG Z 1 : 1  
interactions with strength 0.069  
Residue TYR D 808 :  
to Residue LIG Z 1 : 2  
interactions with strength 1.444  
Residue LIG Z 1 :  
in Residue LIG Z 1 : 2  
interactions with strength 1.335  
4 interactions listed.

CationPi Interaction Analysis  
=====

==

0 interactions listed.

Ionic Interaction Analysis  
=====

|                                 |                        |
|---------------------------------|------------------------|
|                                 | 0 interactions listed. |
| Hydrogen Bond Analysis          |                        |
| Hydrogen Bond Analysis<br>===== |                        |

| Subsite 2 (S3,S4, S6)                                                              |                                                                                                                                                                                                                                                                                                                                                                                                                                                                                                                                                                                                                                                                                                                                                                                             |
|------------------------------------------------------------------------------------|---------------------------------------------------------------------------------------------------------------------------------------------------------------------------------------------------------------------------------------------------------------------------------------------------------------------------------------------------------------------------------------------------------------------------------------------------------------------------------------------------------------------------------------------------------------------------------------------------------------------------------------------------------------------------------------------------------------------------------------------------------------------------------------------|
| COMPD. 35– 79trans_S3S4S6_23.pdb                                                   | Contactos a 4 A                                                                                                                                                                                                                                                                                                                                                                                                                                                                                                                                                                                                                                                                                                                                                                             |
| 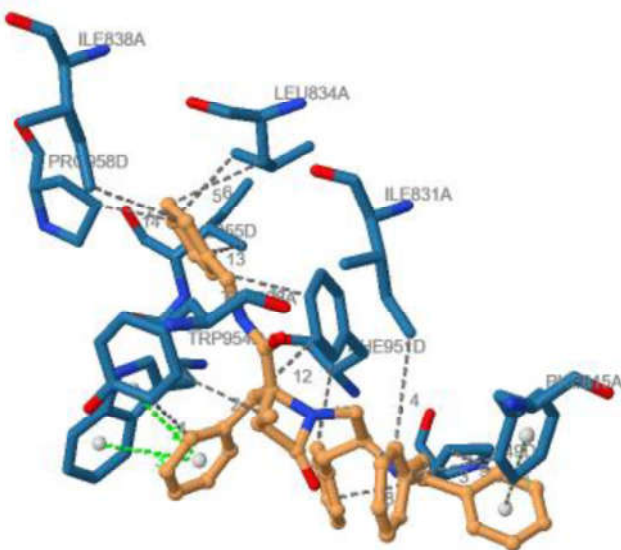 | Contact analysis<br>=====<br>Residue LIG Z 1 :<br>Contacts to Residue PHE A 807 :<br>2<br>Contacts to Residue TYR A 808 :<br>99<br>Contacts to Residue ALA A 811 :<br>32<br>Contacts to Residue GLY A 812 :<br>1<br>Contacts to Residue PHE A 815 :<br>79<br>Contacts to Residue SER A 827 :<br>2<br>Contacts to Residue ILE A 831 :<br>54<br>Contacts to Residue LEU A 834 :<br>59<br>Contacts to Residue ASP A 835 :<br>23<br>Contacts to Residue ILE A 838 :<br>21<br>Contacts to Residue LEU D 948 :<br>4<br>Contacts to Residue PRO D 949 :<br>71<br>Contacts to Residue ARG D 950 :<br>17<br>Contacts to Residue PHE D 951 :<br>125<br>Contacts to Residue TRP D 954 :<br>42<br>Contacts to Residue ILE D 955 :<br>31<br>Contacts to Residue PRO D 958 :<br>29<br>17 contacts listed. |
| PLIP hydrophobic interactions                                                      |                                                                                                                                                                                                                                                                                                                                                                                                                                                                                                                                                                                                                                                                                                                                                                                             |

| ▼ Hydrophobic Interactions .... |         |     |          |             |              |  |
|---------------------------------|---------|-----|----------|-------------|--------------|--|
| Index                           | Residue | AA  | Distance | Ligand Atom | Protein Atom |  |
| 1                               | 808A    | TYR | 3.06     | 10576       | 769          |  |
| 2                               | 808A    | TYR | 3.22     | 10544       | 767          |  |
| 3                               | 815A    | PHE | 3.24     | 10552       | 821          |  |
| 4                               | 831A    | ILE | 3.77     | 10566       | 951          |  |
| 5                               | 834A    | LEU | 3.34     | 10579       | 975          |  |
| 6                               | 834A    | LEU | 3.43     | 10578       | 973          |  |
| 7                               | 838A    | ILE | 3.59     | 10577       | 1012         |  |
| 8                               | 949D    | PRO | 3.48     | 10569       | 9841         |  |
| 9                               | 949D    | PRO | 3.22     | 10561       | 9842         |  |
| 10                              | 951D    | PHE | 3.41     | 10571       | 9861         |  |
| 11                              | 951D    | PHE | 3.31     | 10581       | 9865         |  |
| 12                              | 951D    | PHF | 2.97     | 10543       | 9863         |  |
| 13                              | 955D    | ILE | 3.22     | 10580       | 9902         |  |
| 14                              | 958D    | PRO | 3.01     | 10579       | 9924         |  |

| PLIP HBonds interaction // Pi- Stacking // Pi-Pi |         |     |          |       |        |               |                                          |
|--------------------------------------------------|---------|-----|----------|-------|--------|---------------|------------------------------------------|
| ▼ π-Stacking ....                                |         |     |          |       |        |               |                                          |
| Index                                            | Residue | AA  | Distance | Angle | Offset | Stacking Type | Ligand Atoms                             |
| 1                                                | 815A    | PHE | 4.49     | 69.79 | 0.10   | T             | 10550, 10557, 10558, 10559, 10560, 10561 |
| 2                                                | 954D    | TRP | 3.83     | 10.20 | 0.09   | P             | 10553, 10572, 10573, 10574, 10575, 10576 |
| 3                                                | 954D    | TRP | 4.12     | 9.58  | 1.65   | P             | 10553, 10572, 10573, 10574, 10575, 10576 |

| Yasara Interactions                                                                                                                                                                                                                                                                                                                                                                                                                                                                                                                                                                                                                                                                                                                                                                                                                                                                                                                                                                                                                                                                                 | PiPi / CationPi / ionic                                                                                                                                                                                                                                                                                                                                                                                                                                                                                                                                                      |
|-----------------------------------------------------------------------------------------------------------------------------------------------------------------------------------------------------------------------------------------------------------------------------------------------------------------------------------------------------------------------------------------------------------------------------------------------------------------------------------------------------------------------------------------------------------------------------------------------------------------------------------------------------------------------------------------------------------------------------------------------------------------------------------------------------------------------------------------------------------------------------------------------------------------------------------------------------------------------------------------------------------------------------------------------------------------------------------------------------|------------------------------------------------------------------------------------------------------------------------------------------------------------------------------------------------------------------------------------------------------------------------------------------------------------------------------------------------------------------------------------------------------------------------------------------------------------------------------------------------------------------------------------------------------------------------------|
| <div>Hydrophobic Interaction Analysis</div> <div>=====</div> <div>Residue TYR A 808 :<br/>to Residue LIG Z 1 : 1 interactions with strength 0.077</div> <div>Residue ALA A 811 :<br/>to Residue LIG Z 1 : 1 interactions with strength 0.486</div> <div>Residue PHE A 815 :<br/>to Residue LIG Z 1 : 4 interactions with strength 2.963</div> <div>Residue ILE A 831 :<br/>to Residue LIG Z 1 : 2 interactions with strength 0.487</div> <div>Residue LEU A 834 :<br/>to Residue LIG Z 1 : 1 interactions with strength 0.687</div> <div>Residue ILE A 838 :<br/>to Residue LIG Z 1 : 2 interactions with strength 0.362</div> <div>Residue PRO D 949 :<br/>to Residue LIG Z 1 : 2 interactions with strength 0.237</div> <div>Residue PHE D 951 :<br/>to Residue LIG Z 1 : 4 interactions with strength 1.970</div> <div>Residue TRP D 954 :<br/>to Residue LIG Z 1 : 8 interactions with strength 6.483</div> <div>Residue PRO D 958 :<br/>to Residue LIG Z 1 : 1 interactions with strength 0.156</div> <div>Residue LIG Z 1 :<br/>In Residue LIG Z 1 : 4 interactions with strength 1.758</div> | <div>PiPi Interaction Analysis</div> <div>=====</div> <div>Residue PHE A 815 :<br/>to Residue LIG Z 1 : 4 interactions with strength 6.000</div> <div>Residue HIS A 818 :<br/>to Residue LIG Z 1 : 1 interactions with strength 1.000</div> <div>Residue PHE D 951 :<br/>to Residue LIG Z 1 : 1 interactions with strength 0.067</div> <div>Residue TRP D 954 :<br/>to Residue LIG Z 1 : 1 interactions with strength 0.028</div> <div>4 interactions listed.</div> <div>CationPi Interaction Analysis</div> <div>=====</div> <div>=</div> <div>0 interactions listed.</div> |

|                         |                                                                              |
|-------------------------|------------------------------------------------------------------------------|
| 11 interactions listed. | <p>Ionic Interaction Analysis</p> <p>=====</p> <p>0 interactions listed.</p> |
| Hydrogen Bond Analysis  |                                                                              |
| Hydrogen Bond Analysis  |                                                                              |
| =====                   |                                                                              |

| Subsite 2 (S3,S4, S6)                                                              |                                                                                                                                                                                                                                                                                                                                                                                                                                                                                                                                                                                                                                                                                                                                                                                       |
|------------------------------------------------------------------------------------|---------------------------------------------------------------------------------------------------------------------------------------------------------------------------------------------------------------------------------------------------------------------------------------------------------------------------------------------------------------------------------------------------------------------------------------------------------------------------------------------------------------------------------------------------------------------------------------------------------------------------------------------------------------------------------------------------------------------------------------------------------------------------------------|
| COMPD. 37 -- comp55_S3S4S6_50.pdb                                                  | Contactos a 4 A                                                                                                                                                                                                                                                                                                                                                                                                                                                                                                                                                                                                                                                                                                                                                                       |
| 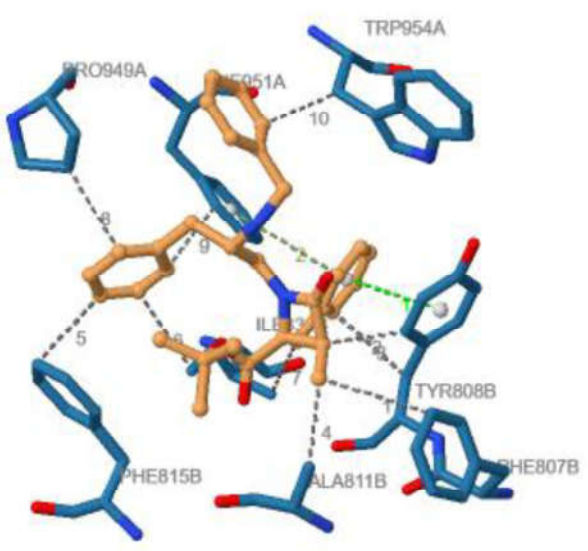 | <p>Contact analysis</p> <p>=====</p> <p>Residue LIG Z 1 :</p> <p>Contacts to Residue PRO A 949 : 29</p> <p>Contacts to Residue ARG A 950 : 13</p> <p>Contacts to Residue PHE A 951 : 111</p> <p>Contacts to Residue GLU A 953 : 3</p> <p>Contacts to Residue TRP A 954 : 38</p> <p>Contacts to Residue ILE A 955 : 1</p> <p>Contacts to Residue PRO A 958 : 1</p> <p>Contacts to Residue PHE B 807 : 10</p> <p>Contacts to Residue TYR B 808 : 87</p> <p>Contacts to Residue ALA B 811 : 52</p> <p>Contacts to Residue GLY B 812 : 4</p> <p>Contacts to Residue PHE B 815 : 59</p> <p>Contacts to Residue SER B 827 : 22</p> <p>Contacts to Residue ILE B 831 : 97</p> <p>Contacts to Residue LEU B 834 : 10</p> <p>Contacts to Residue ASP B 835 : 13</p> <p>16 contacts listed.</p> |
| PLIP hydrophobic interactions                                                      |                                                                                                                                                                                                                                                                                                                                                                                                                                                                                                                                                                                                                                                                                                                                                                                       |

|                                 |         |     |          |             |              |  |
|---------------------------------|---------|-----|----------|-------------|--------------|--|
| ▼ Hydrophobic Interactions **** |         |     |          |             |              |  |
| Index                           | Residue | AA  | Distance | Ligand Atom | Protein Atom |  |
| 1                               | 807B    | PHE | 3.87     | 10542       | 3392         |  |
| 2                               | 808B    | TYR | 2.94     | 10537       | 3401         |  |
| 3                               | 808B    | TYR | 3.53     | 10570       | 3398         |  |
| 4                               | 811B    | ALA | 2.95     | 10542       | 3429         |  |
| 5                               | 815B    | PHE | 3.31     | 10563       | 3459         |  |
| 6                               | 831B    | ILE | 3.35     | 10562       | 3585         |  |
| 7                               | 831B    | ILE | 3.25     | 10541       | 3584         |  |
| 8                               | 949A    | PRO | 3.41     | 10565       | 1940         |  |
| 9                               | 951A    | PHE | 3.09     | 10561       | 1959         |  |
| 10                              | 954A    | TRP | 3.28     | 10560       | 1984         |  |

|                                                  |         |     |          |       |        |               |                                          |
|--------------------------------------------------|---------|-----|----------|-------|--------|---------------|------------------------------------------|
| PLIP HBonds interaction // Pi- Stacking // Pi-Pi |         |     |          |       |        |               |                                          |
| ▼ π-Stacking ****                                |         |     |          |       |        |               |                                          |
| Index                                            | Residue | AA  | Distance | Angle | Offset | Stacking Type | Ligand Atoms                             |
| 1                                                | 808B    | TYR | 3.87     | 23.24 | 1.59   | P             | 10551, 10566, 10567, 10568, 10569, 10570 |
| 2                                                | 951A    | PHE | 4.64     | 70.58 | 0.40   | T             | 10551, 10566, 10567, 10568, 10569, 10570 |

|                                                                                 |                                                                                |
|---------------------------------------------------------------------------------|--------------------------------------------------------------------------------|
| Yasara Interactions                                                             | PiPi / CationPi / ionic                                                        |
| Hydrophobic Interaction Analysis<br>=====                                       | PiPi Interaction Analysis<br>=====                                             |
| Residue PRO A 949 :<br>to Residue LIG Z 1 : 1 interactions with strength 0.222  | Residue PHE A 951 :<br>to Residue LIG Z 1 : 7 interactions with strength 5.358 |
| Residue PHE A 951 :<br>to Residue LIG Z 1 : 10 interactions with strength 5.025 | Residue TRP A 954 :<br>to Residue LIG Z 1 : 1 interactions with strength 0.323 |
| Residue TRP A 954 :<br>to Residue LIG Z 1 : 1 interactions with strength 0.364  | Residue TYR B 808 :<br>to Residue LIG Z 1 : 1 interactions with strength 0.571 |
| Residue PHE B 807 :<br>to Residue LIG Z 1 : 1 interactions with strength 0.652  | Residue PHE B 815 :<br>to Residue LIG Z 1 : 1 interactions with strength 0.559 |
| Residue TYR B 808 :<br>to Residue LIG Z 1 : 10 interactions with strength 3.750 | 4 interactions listed.                                                         |
| Residue PHE B 815 :<br>to Residue LIG Z 1 : 2 interactions with strength 0.107  |                                                                                |
| Residue ILE B 831 :<br>to Residue LIG Z 1 : 2 interactions with strength 0.200  | CationPi Interaction Analysis<br>=====                                         |
| Residue LIG Z 1 :<br>in Residue LIG Z 1 : 2 interactions with strength 0.820    | =                                                                              |
| 8 interactions listed.                                                          | 0 interactions listed.                                                         |
|                                                                                 |                                                                                |
|                                                                                 | Ionic Interaction Analysis<br>=====                                            |
|                                                                                 | 0 interactions listed.                                                         |

|                        |
|------------------------|
| Hydrogen Bond Analysis |
| Hydrogen Bond Analysis |

|                                                                                                                                                                                                                                                                                                                                                                                 |  |
|---------------------------------------------------------------------------------------------------------------------------------------------------------------------------------------------------------------------------------------------------------------------------------------------------------------------------------------------------------------------------------|--|
| <p>=====</p> <p>Residue LIG Z 1 :</p> <p>Atom O LIG 1 Z accepts a bond from N1 LIG 1 Z, O - H distance is 2.12 A, bond energy is 7.50 kJ/mol.</p> <p>Atom N1 LIG 1 Z donates a bond to O LIG 1 Z, H - O distance is 2.12 A, bond energy is 7.50 kJ/mol.</p> <p>2 hydrogen bonds better than 6.25 kJ/mol, 1 accepted, 1 donated. Total hydrogen bond energy is 15.00 kJ/mol.</p> |  |
|---------------------------------------------------------------------------------------------------------------------------------------------------------------------------------------------------------------------------------------------------------------------------------------------------------------------------------------------------------------------------------|--|

Subsite 3 (S5,S6)

COMP.D. 34 -- comp78\_S5S6\_41.pdb

Contactos a 4 A

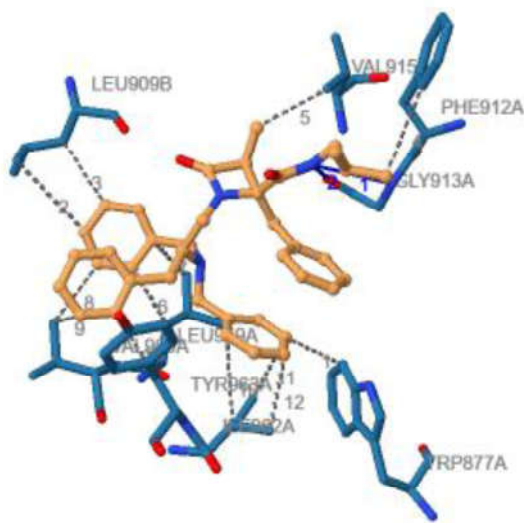

Contact analysis

=====

Residue LIG Z 1 :

Contacts to Residue PHE A 874 : 8

Contacts to Residue TRP A 877 : 27

Contacts to Residue PHE A 912 : 55

Contacts to Residue GLY A 913 : 71

Contacts to Residue GLN A 914 : 21

Contacts to Residue VAL A 915 : 36

Contacts to Residue THR A 956 : 26

Contacts to Residue LEU A 959 : 94

Contacts to Residue VAL A 960 : 87

Contacts to Residue ILE A 962 : 53

Contacts to Residue TYR A 963 : 64

Contacts to Residue LEU B 871 : 16

Contacts to Residue PHE B 874 : 9

Contacts to Residue LEU B 909 : 41

Contacts to Residue ALA B 910 : 24

Contacts to Residue PHE B 912 : 1

16 contacts listed.

PLIP hydrophobic interactions

▼ Hydrophobic Interactions ....

| Index | Residue | AA  | Distance | Ligand Atom | Protein Atom |
|-------|---------|-----|----------|-------------|--------------|
| 1     | 877A    | TRP | 3.45     | 10564       | 1347         |
| 2     | 909B    | LEU | 3.90     | 10568       | 4265         |
| 3     | 909B    | LEU | 3.47     | 10567       | 4262         |
| 4     | 912A    | PHE | 3.69     | 10559       | 1652         |
| 5     | 915A    | VAL | 3.32     | 10542       | 1675         |
| 6     | 959A    | LEU | 3.25     | 10570       | 2028         |
| 7     | 959A    | LEU | 3.59     | 10552       | 2030         |
| 8     | 960A    | VAL | 3.13     | 10569       | 2038         |
| 9     | 960A    | VAL | 3.19     | 10574       | 2038         |
| 10    | 962A    | ILE | 3.88     | 10561       | 2049         |
| 11    | 962A    | ILE | 3.63     | 10564       | 2052         |
| 12    | 962A    | ILE | 3.14     | 10563       | 2051         |
| 13    | 963A    | TYR | 3.15     | 10575       | 2057         |

PLIP HBonds interaction // Pi- Stacking // Pi-Pi

| Hydrogen Bonds |         |     |                 |                 |                |                   |               |                |                  |
|----------------|---------|-----|-----------------|-----------------|----------------|-------------------|---------------|----------------|------------------|
| Index          | Residue | AA  | Distance<br>H-A | Distance<br>D-A | Donor<br>Angle | Protein<br>donor? | Side<br>chain | Donor<br>Atom  | Acceptor<br>Atom |
| 1              | 913A    | GLY | 3.06            | 3.45            | 105.17         | ✓                 | ×             | 1656<br>[Nam]  | 10555<br>[Nam]   |
| 2              | 913A    | GLY | 1.81            | 2.79            | 174.34         | ×                 | ×             | 10555<br>[Nam] | 1659 [O2]        |

| Yasara Interactions                                                                                                                                                                                                                                                                                                                                                                                                                                                                                                                                                                                                                                                         | PiPi / CationPi / ionic                                                                                                                                                                                                                                                                                                                                                                                           |
|-----------------------------------------------------------------------------------------------------------------------------------------------------------------------------------------------------------------------------------------------------------------------------------------------------------------------------------------------------------------------------------------------------------------------------------------------------------------------------------------------------------------------------------------------------------------------------------------------------------------------------------------------------------------------------|-------------------------------------------------------------------------------------------------------------------------------------------------------------------------------------------------------------------------------------------------------------------------------------------------------------------------------------------------------------------------------------------------------------------|
| <b>Hydrophobic Interaction Analysis</b><br>=====<br><br>Residue TRP A 877 :<br>to Residue LIG Z 1 : 1 interactions with strength 0.122<br>Residue PHE A 912 :<br>to Residue LIG Z 1 : 2 interactions with strength 0.406<br>Residue LEU A 959 :<br>to Residue LIG Z 1 : 3 interactions with strength 0.956<br>Residue ILE A 962 :<br>to Residue LIG Z 1 : 4 interactions with strength 1.374<br>Residue TYR A 963 :<br>to Residue LIG Z 1 : 3 interactions with strength 1.841<br>Residue LEU B 909 :<br>to Residue LIG Z 1 : 2 interactions with strength 1.471<br>Residue LIG Z 1 :<br>in Residue LIG Z 1 : 18 interactions with strength 8.487<br>7 interactions listed. | <b>PiPi Interaction Analysis</b><br>=====<br><br>Residue TRP A 877 :<br>to Residue LIG Z 1 : 1 interactions with strength 0.051<br>Residue LIG Z 1 :<br>in Residue LIG Z 1 : 4 interactions with strength 1.477<br>2 interactions listed.<br><br><b>CationPi Interaction Analysis</b><br>=====<br>=<br><br>0 interactions listed.<br><br><b>Ionic Interaction Analysis</b><br>=====<br><br>0 interactions listed. |
| Hydrogen Bond Analysis                                                                                                                                                                                                                                                                                                                                                                                                                                                                                                                                                                                                                                                      |                                                                                                                                                                                                                                                                                                                                                                                                                   |
| <b>Hydrogen Bond Analysis</b><br>=====<br>Residue GLY A 913 :<br>Atom O GLY 913 A accepts a bond<br>from N LIG 1 Z, O-H distance is 1.77 A, bond<br>energy is 25.00 kJ/mol.<br>1 hydrogen bonds better than 6.25 kJ/mol, 1 accepted,<br>0 donated. Total hydrogen bond energy is 25.00<br>kJ/mol.                                                                                                                                                                                                                                                                                                                                                                           |                                                                                                                                                                                                                                                                                                                                                                                                                   |

|                                                                                   |                                                                                                                                                                                                                                                                                                                                                                                                                                                                                                                                                                                                                                                                                                                                                                                                                                                                        |
|-----------------------------------------------------------------------------------|------------------------------------------------------------------------------------------------------------------------------------------------------------------------------------------------------------------------------------------------------------------------------------------------------------------------------------------------------------------------------------------------------------------------------------------------------------------------------------------------------------------------------------------------------------------------------------------------------------------------------------------------------------------------------------------------------------------------------------------------------------------------------------------------------------------------------------------------------------------------|
| 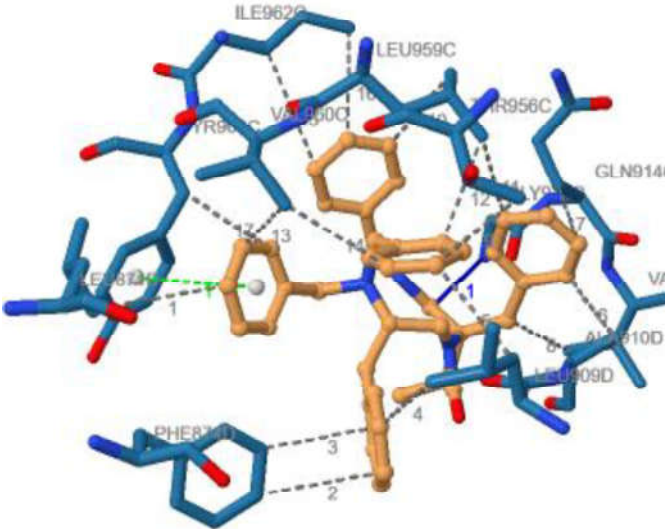 | <p>Contact analysis<br/>=====</p> <p>Residue LIG Z 1 :</p> <p>Contacts to Residue TRP C 877 : 1</p> <p>Contacts to Residue GLY C 913 : 16</p> <p>Contacts to Residue GLN C 914 : 62</p> <p>Contacts to Residue VAL C 915 : 27</p> <p>Contacts to Residue PRO C 916 : 2</p> <p>Contacts to Residue THR C 956 : 34</p> <p>Contacts to Residue LEU C 959 : 102</p> <p>Contacts to Residue VAL C 960 : 63</p> <p>Contacts to Residue ILE C 962 : 30</p> <p>Contacts to Residue TYR C 963 : 40</p> <p>Contacts to Residue LEU D 871 : 16</p> <p>Contacts to Residue PHE D 874 : 27</p> <p>Contacts to Residue MET D 878 : 22</p> <p>Contacts to Residue LEU D 909 : 66</p> <p>Contacts to Residue ALA D 910 : 59</p> <p>Contacts to Residue MET D 911 : 3</p> <p>Contacts to Residue PHE D 912 : 10</p> <p>Contacts to Residue GLY D 913 : 3</p> <p>18 contacts listed.</p> |
| <p>PLIP hydrophobic interactions</p>                                              |                                                                                                                                                                                                                                                                                                                                                                                                                                                                                                                                                                                                                                                                                                                                                                                                                                                                        |

Hydrophobic Interactions \*\*\*\*

| Index | Residue | AA  | Distance | Ligand Atom | Protein Atom |
|-------|---------|-----|----------|-------------|--------------|
| 1     | 871D    | LEU | 3.94     | 10559       | 9195         |
| 2     | 874D    | PHE | 3.79     | 10569       | 9225         |
| 3     | 874D    | PHE | 3.56     | 10570       | 9224         |
| 4     | 909D    | LEU | 3.59     | 10570       | 9533         |
| 5     | 909D    | LEU | 3.53     | 10564       | 9530         |
| 6     | 910D    | ALA | 3.23     | 10576       | 9538         |
| 7     | 914C    | GLN | 3.24     | 10575       | 6932         |
| 8     | 915C    | VAL | 3.50     | 10543       | 6943         |
| 9     | 956C    | THR | 3.35     | 10564       | 7276         |
| 10    | 959C    | LEU | 3.41     | 10578       | 7299         |
| 11    | 959C    | LEU | 3.33     | 10573       | 7298         |
| 12    | 959C    | LEU | 3.37     | 10566       | 7298         |
| 13    | 960C    | VAL | 3.32     | 10560       | 7306         |
| 14    | 960C    | VAL | 3.50     | 10563       | 7306         |
| 15    | 962C    | ILE | 3.97     | 10580       | 7317         |
| 16    | 962C    | ILE | 3.45     | 10579       | 7320         |
| 17    | 963C    | TYR | 3.35     | 10561       | 7325         |

PLIP HBonds interaction // Pi- Stacking // Pi-Pi

Hydrogen Bonds —

| Index | Residue | AA  | Distance<br>H-A | Distance<br>D-A | Donor<br>Angle | Protein<br>donor? | Side<br>chain | Donor<br>Atom | Acceptor<br>Atom |
|-------|---------|-----|-----------------|-----------------|----------------|-------------------|---------------|---------------|------------------|
| 1     | 913C    | GLY | 3.43            | 3.89            | 110.81         | ✓                 | ✗             | 6924<br>[Nam] | 10583<br>[O2]    |

π-Stacking ....

| Index | Residue | AA  | Distance | Angle | Offset | Stacking<br>Type | Ligand Atoms                                |
|-------|---------|-----|----------|-------|--------|------------------|---------------------------------------------|
| 1     | 963C    | TYR | 4.36     | 28.54 | 0.43   | P                | 10550, 10557, 10558, 10559,<br>10560, 10561 |

Yasara Interactions

Hydrophobic Interaction Analysis

=====

Residue LEU C 959 :

to Residue LIG Z 1 : 2 interactions with strength 1.635

Residue VAL C 960 :

to Residue LIG Z 1 : 1 interactions with strength 0.654

Residue ILE C 962 :

to Residue LIG Z 1 : 2 interactions with strength 1.284

Residue TYR C 963 :

to Residue LIG Z 1 : 2 interactions with strength 1.605

Residue LEU D 871 :

to Residue LIG Z 1 : 1 interactions with strength 0.790

Residue PHE D 874 :

to Residue LIG Z 1 : 3 interactions with strength 1.884

Residue LEU D 909 :

PiPi / CationPi / ionic

PiPi Interaction Analysis

=====

Residue TYR C 963 :

to Residue LIG Z 1 : 2 interactions with strength 0.832

Residue PHE D 874 :

to Residue LIG Z 1 : 3 interactions with strength 1.564

Residue LIG Z 1 :

in Residue LIG Z 1 : 3 interactions with strength 4.946

3 interactions listed.

|                                                                                                                                                                                                                                                                                                                                                                                                                    |                                                                                                                                                                         |
|--------------------------------------------------------------------------------------------------------------------------------------------------------------------------------------------------------------------------------------------------------------------------------------------------------------------------------------------------------------------------------------------------------------------|-------------------------------------------------------------------------------------------------------------------------------------------------------------------------|
| <p>to Residue LIG Z 1 : 3 interactions with strength 0.873</p> <p>Residue LIG Z 1 :</p> <p>in Residue LIG Z 1 : 9 interactions with strength 5.281</p> <p>8 interactions listed.</p>                                                                                                                                                                                                                               | <p>CationPi Interaction Analysis</p> <p>=====</p> <p>===</p> <p>0 interactions listed.</p> <p>Ionic Interaction Analysis</p> <p>=====</p> <p>0 interactions listed.</p> |
| <b>Hydrogen Bond Analysis</b>                                                                                                                                                                                                                                                                                                                                                                                      |                                                                                                                                                                         |
| <p>Hydrogen Bond Analysis</p> <p>=====</p> <p>Residue LIG Z 1 :</p> <p>Atom N LIG 1 Z accepts a bond from N LIG 1 Z, N - H distance is 2.07 A, bond energy is 4.76 kcal/mol.</p> <p>Atom N LIG 1 Z donates a bond to N LIG 1 Z, H - N distance is 2.07 A, bond energy is 4.76 kcal/mol.</p> <p>2 hydrogen bonds better than 1.49 kcal/mol, 1 accepted, 1 donated. Total hydrogen bond energy is 9.52 kcal/mol.</p> |                                                                                                                                                                         |

| <b>Subsite 3 (S5,S6)</b>                                                            |                                                                                                                                                                                                                                                                                                                                                                                                                                                                                                                                                                                                                                                                                                                                                                                                                                                                                                               |
|-------------------------------------------------------------------------------------|---------------------------------------------------------------------------------------------------------------------------------------------------------------------------------------------------------------------------------------------------------------------------------------------------------------------------------------------------------------------------------------------------------------------------------------------------------------------------------------------------------------------------------------------------------------------------------------------------------------------------------------------------------------------------------------------------------------------------------------------------------------------------------------------------------------------------------------------------------------------------------------------------------------|
| <b>COMP. 37</b> -- comp55_S5S6_41.pdb                                               | <b>Contactos a 4 A</b>                                                                                                                                                                                                                                                                                                                                                                                                                                                                                                                                                                                                                                                                                                                                                                                                                                                                                        |
| 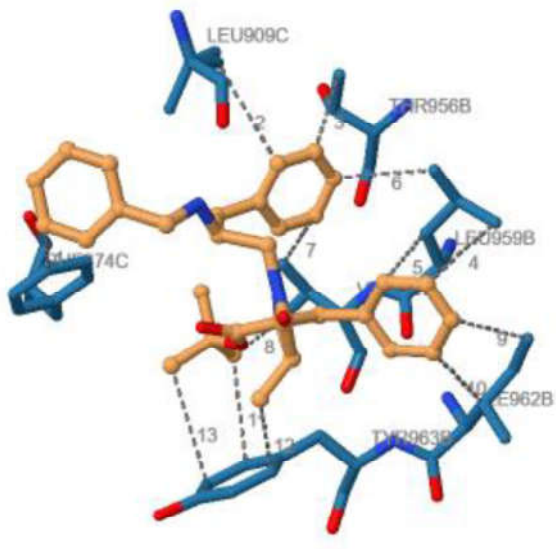 | <p>Contact analysis</p> <p>=====</p> <p>Residue LIG Z 1 :</p> <p>Contacts to Residue TRP B 877 : 5</p> <p>Contacts to Residue GLN B 914 : 7</p> <p>Contacts to Residue ILE B 955 : 1</p> <p>Contacts to Residue THR B 956 : 48</p> <p>Contacts to Residue LEU B 959 : 89</p> <p>Contacts to Residue VAL B 960 : 94</p> <p>Contacts to Residue ILE B 962 : 35</p> <p>Contacts to Residue TYR B 963 : 80</p> <p>Contacts to Residue LEU C 871 : 60</p> <p>Contacts to Residue PHE C 874 : 42</p> <p>Contacts to Residue TRP C 877 : 2</p> <p>Contacts to Residue MET C 878 : 21</p> <p>Contacts to Residue PHE C 881 : 1</p> <p>Contacts to Residue TYR C 908 : 4</p> <p>Contacts to Residue LEU C 909 : 57</p> <p>Contacts to Residue ALA C 910 : 6</p> <p>Contacts to Residue MET C 911 : 8</p> <p>Contacts to Residue PHE C 912 : 3</p> <p>Contacts to Residue GLY C 913 : 23</p> <p>19 contacts listed.</p> |

| PLIP hydrophobic interactions   |         |     |          |             |              |
|---------------------------------|---------|-----|----------|-------------|--------------|
| ▼ Hydrophobic Interactions .... |         |     |          |             |              |
| Index                           | Residue | AA  | Distance | Ligand Atom | Protein Atom |
| 1                               | 874C    | PHE | 3.57     | 10557       | 6591         |
| 2                               | 909C    | LEU | 3.62     | 10565       | 6896         |
| 3                               | 956B    | THR | 3.30     | 10564       | 4642         |
| 4                               | 959B    | LEU | 3.57     | 10567       | 4665         |
| 5                               | 959B    | LEU | 3.69     | 10566       | 4662         |
| 6                               | 959B    | LEU | 3.30     | 10563       | 4664         |
| 7                               | 960B    | VAL | 3.24     | 10562       | 4672         |
| 8                               | 960B    | VAL | 3.36     | 10571       | 4671         |
| 9                               | 962B    | ILE | 3.56     | 10568       | 4686         |
| 10                              | 962B    | ILE | 3.47     | 10569       | 4683         |
| 11                              | 963B    | TYR | 3.54     | 10571       | 4694         |
| 12                              | 963B    | TYR | 3.37     | 10542       | 4693         |
| 13                              | 963B    | TYR | 3.90     | 10572       | 4696         |

| PLIP HBonds interaction // Pi- Stacking // Pi-Pi |  |  |  |  |  |
| Yasara Interactions |  |  | PiPi / CationPi / ionic |  |  |
| Hydrophobic Interaction Analysis ===== |  |  | PiPi Interaction Analysis ===== |  |  |
| Residue LEU B 959 : |  |  | Residue LIG Z 1 : |  |  |
| to Residue LIG Z 1 : 7 interactions with strength 3.292 |  |  | in Residue LIG Z 1 : 4 interactions with strength 2.648 |  |  |
| Residue VAL B 960 : |  |  | 1 interaction listed. |  |  |
| to Residue LIG Z 1 : 2 interactions with strength 0.158 |  |  | CationPi Interaction Analysis |  |  |
| Residue ILE B 962 : |  |  | ===== |  |  |
| to Residue LIG Z 1 : 2 interactions with strength 0.595 |  |  | = |  |  |
| Residue TYR B 963 : |  |  | 0 interactions listed. |  |  |
| to Residue LIG Z 1 : 5 interactions with strength 2.315 |  |  | Ionic Interaction Analysis |  |  |
| Residue LEU C 871 : |  |  | ===== |  |  |
| to Residue LIG Z 1 : 1 interactions with strength 0.591 |  |  | 0 interactions listed. |  |  |
| Residue PHE C 874 : |  |  |  |  |  |
| to Residue LIG Z 1 : 4 interactions with strength 2.041 |  |  |  |  |  |
| Residue MET C 878 : |  |  |  |  |  |
| to Residue LIG Z 1 : 1 interactions with strength 0.078 |  |  |  |  |  |
| Residue LEU C 909 : |  |  |  |  |  |
| to Residue LIG Z 1 : 1 interactions with strength 0.241 |  |  |  |  |  |
| Residue GLY C 913 : |  |  |  |  |  |
| to Residue LIG Z 1 : 2 interactions with strength 0.696 |  |  |  |  |  |

|                                                                                                                                                                                                                                                                                     |  |
|-------------------------------------------------------------------------------------------------------------------------------------------------------------------------------------------------------------------------------------------------------------------------------------|--|
| Residue LIG Z 1 :<br>in Residue LIG Z 1 : 3 interactions with strength<br>0.758<br>10 interactions listed.                                                                                                                                                                          |  |
| <b>Hydrogen Bond Analysis</b>                                                                                                                                                                                                                                                       |  |
| Hydrogen Bond Analysis<br>===== Residue LEU C 909 :<br>Atom O LEU 909 C accepts a bond<br>from N1 LIG 1 Z, O-H distance is 1.94 A, bond<br>energy is 6.85 kJ/mol.<br>1 hydrogen bonds better than 6.25 kJ/mol, 1 accepted,<br>0 donated. Total hydrogen bond energy is 6.85 kJ/mol. |  |

| INNER MOUTH-PORE                                                                   |                                                                                                                                                                                                                                                                                                                                                                                                                                                                                                                                                                                                                                                                                                                                                                                                                                                                                                                                                                                                                                                                                                                          |
|------------------------------------------------------------------------------------|--------------------------------------------------------------------------------------------------------------------------------------------------------------------------------------------------------------------------------------------------------------------------------------------------------------------------------------------------------------------------------------------------------------------------------------------------------------------------------------------------------------------------------------------------------------------------------------------------------------------------------------------------------------------------------------------------------------------------------------------------------------------------------------------------------------------------------------------------------------------------------------------------------------------------------------------------------------------------------------------------------------------------------------------------------------------------------------------------------------------------|
| COMPD. 34 -- comp55_mouthpore_22.pdb                                               | Contactos a 4 A                                                                                                                                                                                                                                                                                                                                                                                                                                                                                                                                                                                                                                                                                                                                                                                                                                                                                                                                                                                                                                                                                                          |
| 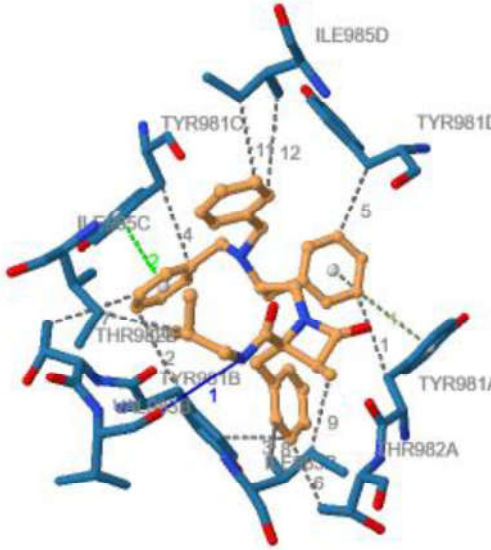 | Contact analysis<br>===== Residue LIG Z 1 :<br>Contacts to Residue MET A 978 : 30<br>Contacts to Residue PHE A 979 : 8<br>Contacts to Residue TYR A 981 : 74<br>Contacts to Residue THR A 982 : 42<br>Contacts to Residue VAL A 983 : 8<br>Contacts to Residue GLY A 984 : 4<br>Contacts to Residue ILE A 985 : 1<br>Contacts to Residue MET B 978 : 23<br>Contacts to Residue PHE B 979 : 7<br>Contacts to Residue TYR B 981 : 68<br>Contacts to Residue THR B 982 : 33<br>Contacts to Residue VAL B 983 : 16<br>Contacts to Residue GLY B 984 : 18<br>Contacts to Residue ILE B 985 : 66<br>Contacts to Residue VAL B 986 : 1<br>Contacts to Residue TRP B 994 : 1<br>Contacts to Residue MET C 978 : 6<br>Contacts to Residue TYR C 981 : 62<br>Contacts to Residue VAL C 983 : 7<br>Contacts to Residue GLY C 984 : 10<br>Contacts to Residue ILE C 985 : 75<br>Contacts to Residue VAL C 986 : 4<br>Contacts to Residue MET D 978 : 32<br>Contacts to Residue PHE D 979 : 1<br>Contacts to Residue TYR D 981 : 25<br>Contacts to Residue GLY D 984 : 1<br>Contacts to Residue ILE D 985 : 33<br>27 contacts listed. |
| <b>PLIP hydrophobic interactions</b>                                               |                                                                                                                                                                                                                                                                                                                                                                                                                                                                                                                                                                                                                                                                                                                                                                                                                                                                                                                                                                                                                                                                                                                          |

| Index | Residue | AA  | Distance | Ligand Atom | Protein Atom |
|-------|---------|-----|----------|-------------|--------------|
| 1     | 981A    | TYR | 3.80     | 10572       | 2196         |
| 2     | 981B    | TYR | 3.75     | 10568       | 4830         |
| 3     | 981B    | TYR | 3.28     | 10577       | 4833         |
| 4     | 981C    | TYR | 3.53     | 10552       | 7464         |
| 5     | 981D    | TYR | 3.18     | 10574       | 10098        |
| 6     | 982A    | THR | 3.02     | 10577       | 2210         |
| 7     | 982B    | THR | 3.77     | 10567       | 4844         |
| 8     | 985B    | ILE | 3.72     | 10576       | 4862         |
| 9     | 985B    | ILE | 3.49     | 10542       | 4861         |
| 10    | 985C    | ILE | 3.39     | 10558       | 7495         |
| 11    | 985D    | ILE | 3.41     | 10564       | 10129        |
| 12    | 985D    | ILE | 3.88     | 10565       | 10130        |

  

| PLIP HBonds interaction // Pi- Stacking // Pi-Pi |         |     |                 |                 |                |                   |                                             |                |                  |
|--------------------------------------------------|---------|-----|-----------------|-----------------|----------------|-------------------|---------------------------------------------|----------------|------------------|
| ▼ Hydrogen Bonds                                 |         |     |                 |                 |                |                   |                                             |                |                  |
| Index                                            | Residue | AA  | Distance<br>H-A | Distance<br>D-A | Donor<br>Angle | Protein<br>donor? | Side<br>chain                               | Donor<br>Atom  | Acceptor<br>Atom |
| 1                                                | 983B    | VAL | 3.21            | 3.73            | 115.11         | ×                 | ×                                           | 10555<br>[Nam] | 4848 [O2]        |
| ▼ π-Stacking                                     |         |     |                 |                 |                |                   |                                             |                |                  |
| Index                                            | Residue | AA  | Distance        | Angle           | Offset         | Stacking<br>Type  | Ligand Atoms                                |                |                  |
| 1                                                | 981A    | TYR | 5.09            | 70.50           | 1.99           | T                 | 10548, 10571, 10572, 10573,<br>10574, 10575 |                |                  |
| 2                                                | 981C    | TYR | 4.13            | 25.91           | 1.46           | P                 | 10552, 10566, 10567, 10568,<br>10569, 10570 |                |                  |

  

| Yasara Interactions                                                                                                                                                                                                                                                                                                                                                                                                                                                                                                                                                                                                                                                                                                                                                                                                                     | PiPi / CationPi / ionic                                                                                                                                                                                                                                                                                                                                                                                                                                   |
|-----------------------------------------------------------------------------------------------------------------------------------------------------------------------------------------------------------------------------------------------------------------------------------------------------------------------------------------------------------------------------------------------------------------------------------------------------------------------------------------------------------------------------------------------------------------------------------------------------------------------------------------------------------------------------------------------------------------------------------------------------------------------------------------------------------------------------------------|-----------------------------------------------------------------------------------------------------------------------------------------------------------------------------------------------------------------------------------------------------------------------------------------------------------------------------------------------------------------------------------------------------------------------------------------------------------|
| Hydrophobic Interaction Analysis<br>=====<br><br>Residue MET A 978 :<br>to Residue LIG Z 1 : 2 interactions with strength 0.820<br>Residue TYR A 981 :<br>to Residue LIG Z 1 : 4 interactions with strength 1.703<br>Residue TYR B 981 :<br>to Residue LIG Z 1 : 6 interactions with strength 2.094<br>Residue THR B 982 :<br>to Residue LIG Z 1 : 2 interactions with strength 1.105<br>Residue GLY B 984 :<br>to Residue LIG Z 1 : 2 interactions with strength 0.685<br>Residue ILE B 985 :<br>to Residue LIG Z 1 : 2 interactions with strength 1.115<br>Residue TYR C 981 :<br>to Residue LIG Z 1 : 11 interactions with strength 3.900<br>Residue ILE C 985 :<br>to Residue LIG Z 1 : 1 interactions with strength 0.705<br>Residue MET D 978 :<br>to Residue LIG Z 1 : 1 interactions with strength 0.016<br>Residue TYR D 981 : | PiPi Interaction Analysis<br>=====<br><br>Residue TYR A 981 :<br>to Residue LIG Z 1 : 1<br>interactions with strength 1.000<br>Residue TYR B 981 :<br>to Residue LIG Z 1 : 4<br>interactions with strength 2.219<br>Residue TYR C 981 :<br>to Residue LIG Z 1 : 5<br>interactions with strength 2.146<br>Residue TYR D 981 :<br>to Residue LIG Z 1 : 1<br>interactions with strength 0.098<br>4 interactions listed.<br><br>CationPi Interaction Analysis |

|                                                                                                                                                                                                                                                      |                                                                                                                    |
|------------------------------------------------------------------------------------------------------------------------------------------------------------------------------------------------------------------------------------------------------|--------------------------------------------------------------------------------------------------------------------|
| to Residue LIG Z 1 : 1 interactions with strength 0.971<br>Residue ILE D 985 :<br>to Residue LIG Z 1 : 2 interactions with strength 0.348<br>Residue LIG Z 1 :<br>in Residue LIG Z 1 : 8 interactions with strength 3.165<br>12 interactions listed. | =====<br>==<br><br>0 interactions listed.<br><br>Ionic Interaction Analysis<br>=====<br><br>0 interactions listed. |
| Hydrogen Bond Analysis                                                                                                                                                                                                                               |                                                                                                                    |

|                                                                                    |                                                                                                                                                                                                                                                                                                                                                                                                                                                                                                                                                                                                                                                                                                                                                                                                                                                                                                                                                                                                                         |
|------------------------------------------------------------------------------------|-------------------------------------------------------------------------------------------------------------------------------------------------------------------------------------------------------------------------------------------------------------------------------------------------------------------------------------------------------------------------------------------------------------------------------------------------------------------------------------------------------------------------------------------------------------------------------------------------------------------------------------------------------------------------------------------------------------------------------------------------------------------------------------------------------------------------------------------------------------------------------------------------------------------------------------------------------------------------------------------------------------------------|
| INNER MOUTH-PORE                                                                   |                                                                                                                                                                                                                                                                                                                                                                                                                                                                                                                                                                                                                                                                                                                                                                                                                                                                                                                                                                                                                         |
| COMPD. 35- 79trans_mouthpore_12.pdb                                                | Contactos a 4 A                                                                                                                                                                                                                                                                                                                                                                                                                                                                                                                                                                                                                                                                                                                                                                                                                                                                                                                                                                                                         |
| 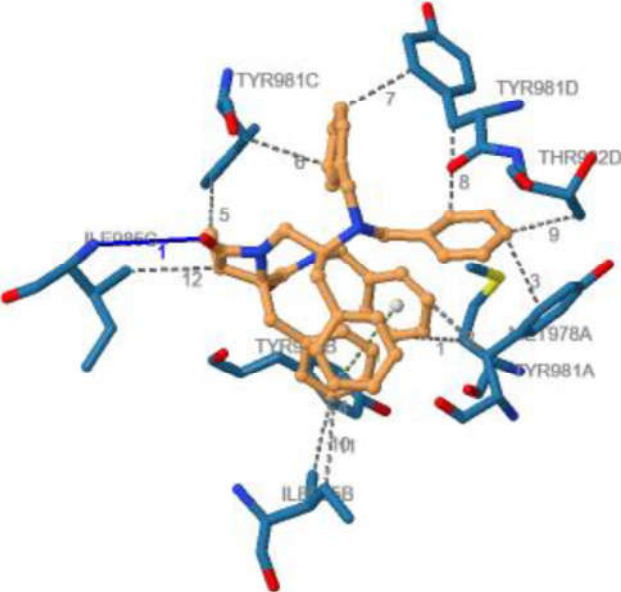 | Contact analysis<br>=====<br>Residue LIG Z 1 :<br>Contacts to Residue MET A 978 :<br>50<br>Contacts to Residue TYR A 981 : 77<br>Contacts to Residue THR A 982 : 16<br>Contacts to Residue VAL A 983 : 8<br>Contacts to Residue GLY A 984 : 2<br>Contacts to Residue ILE A 985 : 11<br>Contacts to Residue MET B 978 :<br>31<br>Contacts to Residue TYR B 981 : 86<br>Contacts to Residue THR B 982 : 14<br>Contacts to Residue VAL B 983 : 3<br>Contacts to Residue ILE B 985 : 43<br>Contacts to Residue TRP B 994 : 1<br>Contacts to Residue MET C 978 :<br>28<br>Contacts to Residue PHE C 979 : 1<br>Contacts to Residue TYR C 981 : 57<br>Contacts to Residue THR C 982 : 9<br>Contacts to Residue VAL C 983 : 1<br>Contacts to Residue GLY C 984 : 1<br>Contacts to Residue ILE C 985 : 29<br>Contacts to Residue MET D 978 :<br>22<br>Contacts to Residue PHE D 979 : 5<br>Contacts to Residue TYR D 981 : 69<br>Contacts to Residue THR D 982 : 26<br>Contacts to Residue ILE D 985 : 3<br>24 contacts listed. |
| PLIP hydrophobic interactions                                                      |                                                                                                                                                                                                                                                                                                                                                                                                                                                                                                                                                                                                                                                                                                                                                                                                                                                                                                                                                                                                                         |

| ▼ Hydrophobic Interactions **** |         |     |          |             |              |
|---------------------------------|---------|-----|----------|-------------|--------------|
| Index                           | Residue | AA  | Distance | Ligand Atom | Protein Atom |
| 1                               | 978A    | MET | 3.96     | 10578       | 2173         |
| 2                               | 981A    | TYR | 3.30     | 10580       | 2196         |
| 3                               | 981A    | TYR | 3.35     | 10559       | 2199         |
| 4                               | 981B    | TYR | 3.41     | 10573       | 4833         |
| 5                               | 981C    | TYR | 3.39     | 10544       | 7467         |
| 6                               | 981C    | TYR | 3.26     | 10565       | 7464         |
| 7                               | 981D    | TYR | 3.13     | 10563       | 10101        |
| 8                               | 981D    | TYR | 3.45     | 10557       | 10098        |
| 9                               | 982D    | THR | 3.53     | 10559       | 10112        |
| 10                              | 985B    | ILE | 3.73     | 10573       | 4862         |
| 11                              | 985B    | ILE | 3.56     | 10568       | 4861         |
| 12                              | 985C    | ILE | 3.45     | 10540       | 7496         |

| PLIP HBonds interaction // Pi- Stacking // Pi-Pi |         |     |                 |                 |                |                   |               |               |                  |
|--------------------------------------------------|---------|-----|-----------------|-----------------|----------------|-------------------|---------------|---------------|------------------|
| ▼ Hydrogen Bonds —                               |         |     |                 |                 |                |                   |               |               |                  |
| Index                                            | Residue | AA  | Distance<br>H-A | Distance<br>D-A | Donor<br>Angle | Protein<br>donor? | Side<br>chain | Donor<br>Atom | Acceptor<br>Atom |
| 1                                                | 985C    | ILE | 3.12            | 3.93            | 140.95         | ✓                 | ✗             | 7490<br>[Nam] | 10582<br>[O2]    |

| ▼ π-Stacking .... |         |     |          |       |        |                  |                                             |
|-------------------|---------|-----|----------|-------|--------|------------------|---------------------------------------------|
| Index             | Residue | AA  | Distance | Angle | Offset | Stacking<br>Type | Ligand Atoms                                |
| 1                 | 981B    | TYR | 4.76     | 71.07 | 1.45   | T                | 10556, 10577, 10578,<br>10579, 10580, 10581 |

| Yasara Interactions                                                            | PiPi / CationPi / ionic                                                        |
|--------------------------------------------------------------------------------|--------------------------------------------------------------------------------|
| Hydrophobic Interaction Analysis<br>=====                                      | PiPi Interaction Analysis<br>=====                                             |
| Residue MET A 978 :<br>to Residue LIG Z 1 : 2 interactions with strength 0.949 | Residue TYR A 981 :<br>to Residue LIG Z 1 : 2 interactions with strength 1.034 |
| Residue TYR A 981 :<br>to Residue LIG Z 1 : 2 interactions with strength 2.383 | Residue TYR B 981 :<br>to Residue LIG Z 1 : 4 interactions with strength 3.749 |
| Residue MET B 978 :<br>to Residue LIG Z 1 : 2 interactions with strength 0.106 | Residue TYR D 981 :<br>to Residue LIG Z 1 : 1 interactions with strength 0.060 |
| Residue TYR B 981<br>to Residue LIG Z 1 : 4 interactions with strength 2.280   | Residue LIG Z 1 :<br>in Residue LIG Z 1 : 2 interactions with strength 2.082   |
| Residue ILE B 985 :<br>to Residue LIG Z 1 : 4 interactions with strength 1.980 | 4 interactions listed.                                                         |
| Residue TYR C 981 :<br>to Residue LIG Z 1 : 1 interactions with strength 0.205 | CationPi Interaction Analysis<br>=====                                         |
| Residue ILE C 985 :<br>to Residue LIG Z 1 : 1 interactions with strength 0.449 | ==                                                                             |
| Residue TYR D 981 :<br>to Residue LIG Z 1 : 2 interactions with strength 0.934 | 0 interactions listed.                                                         |
| Residue THR D 982 :<br>to Residue LIG Z 1 : 1 interactions with strength 0.012 |                                                                                |
| Residue LIG Z 1 :                                                              |                                                                                |

|                                                                                     |                                     |
|-------------------------------------------------------------------------------------|-------------------------------------|
| in Residue LIG Z 1 : 10 interactions with strength 7.265<br>10 interactions listed. | Ionic Interaction Analysis<br>===== |
| Hydrogen Bond Analysis                                                              | 0 interactions listed.              |

| INNER MOUTH-PORE                                                                   |                                                                                                                                                                                                                                                                                                                                                                                                                                                                                                                                                                                                                                                                                                                                                                                                          |
|------------------------------------------------------------------------------------|----------------------------------------------------------------------------------------------------------------------------------------------------------------------------------------------------------------------------------------------------------------------------------------------------------------------------------------------------------------------------------------------------------------------------------------------------------------------------------------------------------------------------------------------------------------------------------------------------------------------------------------------------------------------------------------------------------------------------------------------------------------------------------------------------------|
| COMP. 37 -- comp55_mouthpore_22.pdb                                                | Contactos a 4 A                                                                                                                                                                                                                                                                                                                                                                                                                                                                                                                                                                                                                                                                                                                                                                                          |
| 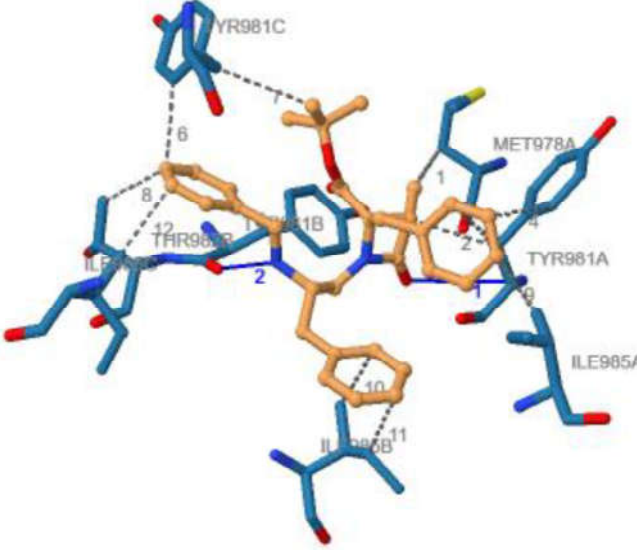 | <b>Contact analysis</b><br>=====<br><b>Residue LIG Z 1 :</b><br>Contacts to Residue MET A 978 : 51<br>Contacts to Residue PHE A 979 : 1<br>Contacts to Residue TYR A 981 : 94<br>Contacts to Residue THR A 982 : 14<br>Contacts to Residue VAL A 983 : 14<br>Contacts to Residue GLY A 984 : 14<br>Contacts to Residue ILE A 985 : 20<br>Contacts to Residue MET B 978 : 61<br>Contacts to Residue PHE B 979 : 5<br>Contacts to Residue TYR B 981 : 96<br>Contacts to Residue THR B 982 : 36<br>Contacts to Residue VAL B 983 : 5<br>Contacts to Residue GLY B 984 : 3<br>Contacts to Residue ILE B 985 : 74<br>Contacts to Residue VAL B 986 : 1<br>Contacts to Residue MET C 978 : 39<br>Contacts to Residue TYR C 981 : 48<br>Contacts to Residue ILE C 985 : 22<br>Contacts to Residue TRP C 994 : 3 |

|                                                                                                                                                                                                                                                                                                                                                                                                                                                                                                                                                                                                                                                                                                                                                                                                                                                                                                                                                                                                                                                                                                                                                                                                              | <div>Contacts to Residue MET D 978 : 13</div> <div>Contacts to Residue TYR D 981 : 1</div> <div>Contacts to Residue THR D 982 : 6</div> <div>22 contacts listed.</div> |     |              |              |              |                |            |            |               |  |                                                                                                                                                                                                                                                                                                                                                                                                                             |         |    |              |              |              |                |            |            |               |       |      |     |      |      |        |       |      |            |            |     |      |       |      |      |        |     |      |            |           |   |      |     |      |       |      |   |      |     |      |       |      |   |      |     |      |       |      |   |      |     |      |       |      |   |      |     |      |       |      |    |      |     |      |       |      |    |      |     |      |       |      |    |      |     |      |       |      |
|--------------------------------------------------------------------------------------------------------------------------------------------------------------------------------------------------------------------------------------------------------------------------------------------------------------------------------------------------------------------------------------------------------------------------------------------------------------------------------------------------------------------------------------------------------------------------------------------------------------------------------------------------------------------------------------------------------------------------------------------------------------------------------------------------------------------------------------------------------------------------------------------------------------------------------------------------------------------------------------------------------------------------------------------------------------------------------------------------------------------------------------------------------------------------------------------------------------|------------------------------------------------------------------------------------------------------------------------------------------------------------------------|-----|--------------|--------------|--------------|----------------|------------|------------|---------------|--|-----------------------------------------------------------------------------------------------------------------------------------------------------------------------------------------------------------------------------------------------------------------------------------------------------------------------------------------------------------------------------------------------------------------------------|---------|----|--------------|--------------|--------------|----------------|------------|------------|---------------|-------|------|-----|------|------|--------|-------|------|------------|------------|-----|------|-------|------|------|--------|-----|------|------------|-----------|---|------|-----|------|-------|------|---|------|-----|------|-------|------|---|------|-----|------|-------|------|---|------|-----|------|-------|------|---|------|-----|------|-------|------|----|------|-----|------|-------|------|----|------|-----|------|-------|------|----|------|-----|------|-------|------|
| PLIP hydrophobic interactions                                                                                                                                                                                                                                                                                                                                                                                                                                                                                                                                                                                                                                                                                                                                                                                                                                                                                                                                                                                                                                                                                                                                                                                |                                                                                                                                                                        |     |              |              |              |                |            |            |               |  |                                                                                                                                                                                                                                                                                                                                                                                                                             |         |    |              |              |              |                |            |            |               |       |      |     |      |      |        |       |      |            |            |     |      |       |      |      |        |     |      |            |           |   |      |     |      |       |      |   |      |     |      |       |      |   |      |     |      |       |      |   |      |     |      |       |      |   |      |     |      |       |      |    |      |     |      |       |      |    |      |     |      |       |      |    |      |     |      |       |      |
| ▼Hydrophobic Interactions ****                                                                                                                                                                                                                                                                                                                                                                                                                                                                                                                                                                                                                                                                                                                                                                                                                                                                                                                                                                                                                                                                                                                                                                               |                                                                                                                                                                        |     |              |              |              |                |            |            |               |  |                                                                                                                                                                                                                                                                                                                                                                                                                             |         |    |              |              |              |                |            |            |               |       |      |     |      |      |        |       |      |            |            |     |      |       |      |      |        |     |      |            |           |   |      |     |      |       |      |   |      |     |      |       |      |   |      |     |      |       |      |   |      |     |      |       |      |   |      |     |      |       |      |    |      |     |      |       |      |    |      |     |      |       |      |    |      |     |      |       |      |
| <table><thead><tr><th>Index</th><th>Residue</th><th>AA</th><th>Distance</th><th>Ligand Atom</th><th>Protein Atom</th></tr></thead><tbody><tr><td>1</td><td>978A</td><td>MET</td><td>3.90</td><td>10542</td><td>2173</td></tr><tr><td>2</td><td>981A</td><td>TYR</td><td>3.13</td><td>10537</td><td>2196</td></tr><tr><td>3</td><td>981A</td><td>TYR</td><td>3.69</td><td>10566</td><td>2196</td></tr><tr><td>4</td><td>981A</td><td>TYR</td><td>3.18</td><td>10567</td><td>2199</td></tr><tr><td>5</td><td>981B</td><td>TYR</td><td>3.43</td><td>10556</td><td>4830</td></tr><tr><td>6</td><td>981C</td><td>TYR</td><td>3.02</td><td>10558</td><td>7467</td></tr><tr><td>7</td><td>981C</td><td>TYR</td><td>3.70</td><td>10571</td><td>7464</td></tr><tr><td>8</td><td>982B</td><td>THR</td><td>3.10</td><td>10558</td><td>4844</td></tr><tr><td>9</td><td>985A</td><td>ILE</td><td>3.58</td><td>10568</td><td>2228</td></tr><tr><td>10</td><td>985B</td><td>ILE</td><td>3.35</td><td>10561</td><td>4862</td></tr><tr><td>11</td><td>985B</td><td>ILE</td><td>3.28</td><td>10563</td><td>4861</td></tr><tr><td>12</td><td>985C</td><td>ILE</td><td>3.03</td><td>10559</td><td>7496</td></tr></tbody></table> |                                                                                                                                                                        |     |              |              |              |                |            |            |               |  | Index                                                                                                                                                                                                                                                                                                                                                                                                                       | Residue | AA | Distance     | Ligand Atom  | Protein Atom | 1              | 978A       | MET        | 3.90          | 10542 | 2173 | 2   | 981A | TYR  | 3.13   | 10537 | 2196 | 3          | 981A       | TYR | 3.69 | 10566 | 2196 | 4    | 981A   | TYR | 3.18 | 10567      | 2199      | 5 | 981B | TYR | 3.43 | 10556 | 4830 | 6 | 981C | TYR | 3.02 | 10558 | 7467 | 7 | 981C | TYR | 3.70 | 10571 | 7464 | 8 | 982B | THR | 3.10 | 10558 | 4844 | 9 | 985A | ILE | 3.58 | 10568 | 2228 | 10 | 985B | ILE | 3.35 | 10561 | 4862 | 11 | 985B | ILE | 3.28 | 10563 | 4861 | 12 | 985C | ILE | 3.03 | 10559 | 7496 |
| Index                                                                                                                                                                                                                                                                                                                                                                                                                                                                                                                                                                                                                                                                                                                                                                                                                                                                                                                                                                                                                                                                                                                                                                                                        | Residue                                                                                                                                                                | AA  | Distance     | Ligand Atom  | Protein Atom |                |            |            |               |  |                                                                                                                                                                                                                                                                                                                                                                                                                             |         |    |              |              |              |                |            |            |               |       |      |     |      |      |        |       |      |            |            |     |      |       |      |      |        |     |      |            |           |   |      |     |      |       |      |   |      |     |      |       |      |   |      |     |      |       |      |   |      |     |      |       |      |   |      |     |      |       |      |    |      |     |      |       |      |    |      |     |      |       |      |    |      |     |      |       |      |
| 1                                                                                                                                                                                                                                                                                                                                                                                                                                                                                                                                                                                                                                                                                                                                                                                                                                                                                                                                                                                                                                                                                                                                                                                                            | 978A                                                                                                                                                                   | MET | 3.90         | 10542        | 2173         |                |            |            |               |  |                                                                                                                                                                                                                                                                                                                                                                                                                             |         |    |              |              |              |                |            |            |               |       |      |     |      |      |        |       |      |            |            |     |      |       |      |      |        |     |      |            |           |   |      |     |      |       |      |   |      |     |      |       |      |   |      |     |      |       |      |   |      |     |      |       |      |   |      |     |      |       |      |    |      |     |      |       |      |    |      |     |      |       |      |    |      |     |      |       |      |
| 2                                                                                                                                                                                                                                                                                                                                                                                                                                                                                                                                                                                                                                                                                                                                                                                                                                                                                                                                                                                                                                                                                                                                                                                                            | 981A                                                                                                                                                                   | TYR | 3.13         | 10537        | 2196         |                |            |            |               |  |                                                                                                                                                                                                                                                                                                                                                                                                                             |         |    |              |              |              |                |            |            |               |       |      |     |      |      |        |       |      |            |            |     |      |       |      |      |        |     |      |            |           |   |      |     |      |       |      |   |      |     |      |       |      |   |      |     |      |       |      |   |      |     |      |       |      |   |      |     |      |       |      |    |      |     |      |       |      |    |      |     |      |       |      |    |      |     |      |       |      |
| 3                                                                                                                                                                                                                                                                                                                                                                                                                                                                                                                                                                                                                                                                                                                                                                                                                                                                                                                                                                                                                                                                                                                                                                                                            | 981A                                                                                                                                                                   | TYR | 3.69         | 10566        | 2196         |                |            |            |               |  |                                                                                                                                                                                                                                                                                                                                                                                                                             |         |    |              |              |              |                |            |            |               |       |      |     |      |      |        |       |      |            |            |     |      |       |      |      |        |     |      |            |           |   |      |     |      |       |      |   |      |     |      |       |      |   |      |     |      |       |      |   |      |     |      |       |      |   |      |     |      |       |      |    |      |     |      |       |      |    |      |     |      |       |      |    |      |     |      |       |      |
| 4                                                                                                                                                                                                                                                                                                                                                                                                                                                                                                                                                                                                                                                                                                                                                                                                                                                                                                                                                                                                                                                                                                                                                                                                            | 981A                                                                                                                                                                   | TYR | 3.18         | 10567        | 2199         |                |            |            |               |  |                                                                                                                                                                                                                                                                                                                                                                                                                             |         |    |              |              |              |                |            |            |               |       |      |     |      |      |        |       |      |            |            |     |      |       |      |      |        |     |      |            |           |   |      |     |      |       |      |   |      |     |      |       |      |   |      |     |      |       |      |   |      |     |      |       |      |   |      |     |      |       |      |    |      |     |      |       |      |    |      |     |      |       |      |    |      |     |      |       |      |
| 5                                                                                                                                                                                                                                                                                                                                                                                                                                                                                                                                                                                                                                                                                                                                                                                                                                                                                                                                                                                                                                                                                                                                                                                                            | 981B                                                                                                                                                                   | TYR | 3.43         | 10556        | 4830         |                |            |            |               |  |                                                                                                                                                                                                                                                                                                                                                                                                                             |         |    |              |              |              |                |            |            |               |       |      |     |      |      |        |       |      |            |            |     |      |       |      |      |        |     |      |            |           |   |      |     |      |       |      |   |      |     |      |       |      |   |      |     |      |       |      |   |      |     |      |       |      |   |      |     |      |       |      |    |      |     |      |       |      |    |      |     |      |       |      |    |      |     |      |       |      |
| 6                                                                                                                                                                                                                                                                                                                                                                                                                                                                                                                                                                                                                                                                                                                                                                                                                                                                                                                                                                                                                                                                                                                                                                                                            | 981C                                                                                                                                                                   | TYR | 3.02         | 10558        | 7467         |                |            |            |               |  |                                                                                                                                                                                                                                                                                                                                                                                                                             |         |    |              |              |              |                |            |            |               |       |      |     |      |      |        |       |      |            |            |     |      |       |      |      |        |     |      |            |           |   |      |     |      |       |      |   |      |     |      |       |      |   |      |     |      |       |      |   |      |     |      |       |      |   |      |     |      |       |      |    |      |     |      |       |      |    |      |     |      |       |      |    |      |     |      |       |      |
| 7                                                                                                                                                                                                                                                                                                                                                                                                                                                                                                                                                                                                                                                                                                                                                                                                                                                                                                                                                                                                                                                                                                                                                                                                            | 981C                                                                                                                                                                   | TYR | 3.70         | 10571        | 7464         |                |            |            |               |  |                                                                                                                                                                                                                                                                                                                                                                                                                             |         |    |              |              |              |                |            |            |               |       |      |     |      |      |        |       |      |            |            |     |      |       |      |      |        |     |      |            |           |   |      |     |      |       |      |   |      |     |      |       |      |   |      |     |      |       |      |   |      |     |      |       |      |   |      |     |      |       |      |    |      |     |      |       |      |    |      |     |      |       |      |    |      |     |      |       |      |
| 8                                                                                                                                                                                                                                                                                                                                                                                                                                                                                                                                                                                                                                                                                                                                                                                                                                                                                                                                                                                                                                                                                                                                                                                                            | 982B                                                                                                                                                                   | THR | 3.10         | 10558        | 4844         |                |            |            |               |  |                                                                                                                                                                                                                                                                                                                                                                                                                             |         |    |              |              |              |                |            |            |               |       |      |     |      |      |        |       |      |            |            |     |      |       |      |      |        |     |      |            |           |   |      |     |      |       |      |   |      |     |      |       |      |   |      |     |      |       |      |   |      |     |      |       |      |   |      |     |      |       |      |    |      |     |      |       |      |    |      |     |      |       |      |    |      |     |      |       |      |
| 9                                                                                                                                                                                                                                                                                                                                                                                                                                                                                                                                                                                                                                                                                                                                                                                                                                                                                                                                                                                                                                                                                                                                                                                                            | 985A                                                                                                                                                                   | ILE | 3.58         | 10568        | 2228         |                |            |            |               |  |                                                                                                                                                                                                                                                                                                                                                                                                                             |         |    |              |              |              |                |            |            |               |       |      |     |      |      |        |       |      |            |            |     |      |       |      |      |        |     |      |            |           |   |      |     |      |       |      |   |      |     |      |       |      |   |      |     |      |       |      |   |      |     |      |       |      |   |      |     |      |       |      |    |      |     |      |       |      |    |      |     |      |       |      |    |      |     |      |       |      |
| 10                                                                                                                                                                                                                                                                                                                                                                                                                                                                                                                                                                                                                                                                                                                                                                                                                                                                                                                                                                                                                                                                                                                                                                                                           | 985B                                                                                                                                                                   | ILE | 3.35         | 10561        | 4862         |                |            |            |               |  |                                                                                                                                                                                                                                                                                                                                                                                                                             |         |    |              |              |              |                |            |            |               |       |      |     |      |      |        |       |      |            |            |     |      |       |      |      |        |     |      |            |           |   |      |     |      |       |      |   |      |     |      |       |      |   |      |     |      |       |      |   |      |     |      |       |      |   |      |     |      |       |      |    |      |     |      |       |      |    |      |     |      |       |      |    |      |     |      |       |      |
| 11                                                                                                                                                                                                                                                                                                                                                                                                                                                                                                                                                                                                                                                                                                                                                                                                                                                                                                                                                                                                                                                                                                                                                                                                           | 985B                                                                                                                                                                   | ILE | 3.28         | 10563        | 4861         |                |            |            |               |  |                                                                                                                                                                                                                                                                                                                                                                                                                             |         |    |              |              |              |                |            |            |               |       |      |     |      |      |        |       |      |            |            |     |      |       |      |      |        |     |      |            |           |   |      |     |      |       |      |   |      |     |      |       |      |   |      |     |      |       |      |   |      |     |      |       |      |   |      |     |      |       |      |    |      |     |      |       |      |    |      |     |      |       |      |    |      |     |      |       |      |
| 12                                                                                                                                                                                                                                                                                                                                                                                                                                                                                                                                                                                                                                                                                                                                                                                                                                                                                                                                                                                                                                                                                                                                                                                                           | 985C                                                                                                                                                                   | ILE | 3.03         | 10559        | 7496         |                |            |            |               |  |                                                                                                                                                                                                                                                                                                                                                                                                                             |         |    |              |              |              |                |            |            |               |       |      |     |      |      |        |       |      |            |            |     |      |       |      |      |        |     |      |            |           |   |      |     |      |       |      |   |      |     |      |       |      |   |      |     |      |       |      |   |      |     |      |       |      |   |      |     |      |       |      |    |      |     |      |       |      |    |      |     |      |       |      |    |      |     |      |       |      |
| PLIP HBonds interaction // Pi- Stacking // Pi-Pi                                                                                                                                                                                                                                                                                                                                                                                                                                                                                                                                                                                                                                                                                                                                                                                                                                                                                                                                                                                                                                                                                                                                                             |                                                                                                                                                                        |     |              |              |              |                |            |            |               |  |                                                                                                                                                                                                                                                                                                                                                                                                                             |         |    |              |              |              |                |            |            |               |       |      |     |      |      |        |       |      |            |            |     |      |       |      |      |        |     |      |            |           |   |      |     |      |       |      |   |      |     |      |       |      |   |      |     |      |       |      |   |      |     |      |       |      |   |      |     |      |       |      |    |      |     |      |       |      |    |      |     |      |       |      |    |      |     |      |       |      |
| <table><thead><tr><th>Index</th><th>Residue</th><th>AA</th><th>Distance H-A</th><th>Distance D-A</th><th>Donor Angle</th><th>Protein donor?</th><th>Side chain</th><th>Donor Atom</th><th>Acceptor Atom</th></tr></thead><tbody><tr><td>1</td><td>981A</td><td>TYR</td><td>3.65</td><td>4.07</td><td>108.40</td><td>✓</td><td>×</td><td>2192 [Nam]</td><td>10543 [O2]</td></tr><tr><td>2</td><td>981B</td><td>TYR</td><td>2.09</td><td>2.58</td><td>107.35</td><td>×</td><td>×</td><td>10547 [N3]</td><td>4829 [O2]</td></tr></tbody></table>                                                                                                                                                                                                                                                                                                                                                                                                                                                                                                                                                                                                                                                                |                                                                                                                                                                        |     |              |              |              |                |            |            |               |  | Index                                                                                                                                                                                                                                                                                                                                                                                                                       | Residue | AA | Distance H-A | Distance D-A | Donor Angle  | Protein donor? | Side chain | Donor Atom | Acceptor Atom | 1     | 981A | TYR | 3.65 | 4.07 | 108.40 | ✓     | ×    | 2192 [Nam] | 10543 [O2] | 2   | 981B | TYR   | 2.09 | 2.58 | 107.35 | ×   | ×    | 10547 [N3] | 4829 [O2] |   |      |     |      |       |      |   |      |     |      |       |      |   |      |     |      |       |      |   |      |     |      |       |      |   |      |     |      |       |      |    |      |     |      |       |      |    |      |     |      |       |      |    |      |     |      |       |      |
| Index                                                                                                                                                                                                                                                                                                                                                                                                                                                                                                                                                                                                                                                                                                                                                                                                                                                                                                                                                                                                                                                                                                                                                                                                        | Residue                                                                                                                                                                | AA  | Distance H-A | Distance D-A | Donor Angle  | Protein donor? | Side chain | Donor Atom | Acceptor Atom |  |                                                                                                                                                                                                                                                                                                                                                                                                                             |         |    |              |              |              |                |            |            |               |       |      |     |      |      |        |       |      |            |            |     |      |       |      |      |        |     |      |            |           |   |      |     |      |       |      |   |      |     |      |       |      |   |      |     |      |       |      |   |      |     |      |       |      |   |      |     |      |       |      |    |      |     |      |       |      |    |      |     |      |       |      |    |      |     |      |       |      |
| 1                                                                                                                                                                                                                                                                                                                                                                                                                                                                                                                                                                                                                                                                                                                                                                                                                                                                                                                                                                                                                                                                                                                                                                                                            | 981A                                                                                                                                                                   | TYR | 3.65         | 4.07         | 108.40       | ✓              | ×          | 2192 [Nam] | 10543 [O2]    |  |                                                                                                                                                                                                                                                                                                                                                                                                                             |         |    |              |              |              |                |            |            |               |       |      |     |      |      |        |       |      |            |            |     |      |       |      |      |        |     |      |            |           |   |      |     |      |       |      |   |      |     |      |       |      |   |      |     |      |       |      |   |      |     |      |       |      |   |      |     |      |       |      |    |      |     |      |       |      |    |      |     |      |       |      |    |      |     |      |       |      |
| 2                                                                                                                                                                                                                                                                                                                                                                                                                                                                                                                                                                                                                                                                                                                                                                                                                                                                                                                                                                                                                                                                                                                                                                                                            | 981B                                                                                                                                                                   | TYR | 2.09         | 2.58         | 107.35       | ×              | ×          | 10547 [N3] | 4829 [O2]     |  |                                                                                                                                                                                                                                                                                                                                                                                                                             |         |    |              |              |              |                |            |            |               |       |      |     |      |      |        |       |      |            |            |     |      |       |      |      |        |     |      |            |           |   |      |     |      |       |      |   |      |     |      |       |      |   |      |     |      |       |      |   |      |     |      |       |      |   |      |     |      |       |      |    |      |     |      |       |      |    |      |     |      |       |      |    |      |     |      |       |      |
| Yasara Interactions                                                                                                                                                                                                                                                                                                                                                                                                                                                                                                                                                                                                                                                                                                                                                                                                                                                                                                                                                                                                                                                                                                                                                                                          |                                                                                                                                                                        |     |              |              |              |                |            |            |               |  |                                                                                                                                                                                                                                                                                                                                                                                                                             |         |    |              |              |              |                |            |            |               |       |      |     |      |      |        |       |      |            |            |     |      |       |      |      |        |     |      |            |           |   |      |     |      |       |      |   |      |     |      |       |      |   |      |     |      |       |      |   |      |     |      |       |      |   |      |     |      |       |      |    |      |     |      |       |      |    |      |     |      |       |      |    |      |     |      |       |      |
| PiPi / CationPi / ionic                                                                                                                                                                                                                                                                                                                                                                                                                                                                                                                                                                                                                                                                                                                                                                                                                                                                                                                                                                                                                                                                                                                                                                                      |                                                                                                                                                                        |     |              |              |              |                |            |            |               |  |                                                                                                                                                                                                                                                                                                                                                                                                                             |         |    |              |              |              |                |            |            |               |       |      |     |      |      |        |       |      |            |            |     |      |       |      |      |        |     |      |            |           |   |      |     |      |       |      |   |      |     |      |       |      |   |      |     |      |       |      |   |      |     |      |       |      |   |      |     |      |       |      |    |      |     |      |       |      |    |      |     |      |       |      |    |      |     |      |       |      |
| <div>Hydrophobic Interaction Analysis</div> <div>=====</div> <div>Residue MET A 978 :<br/>to Residue LIG Z 1 : 2 interactions with strength 1.225</div> <div>Residue TYR A 981 :<br/>to Residue LIG Z 1 : 7 interactions with strength 2.726</div> <div>Residue GLY A 984 :<br/>to Residue LIG Z 1 : 1 interactions with strength 0.217</div> <div>Residue ILE A 985 :<br/>to Residue LIG Z 1 : 1 interactions with strength 0.115</div> <div>Residue TYR B 981 :<br/>to Residue LIG Z 1 : 1 interactions with strength 0.517</div> <div>Residue ILE B 985 :<br/>to Residue LIG Z 1 : 3 interactions with strength 0.756</div> <div>Residue MET C 978 :<br/>to Residue LIG Z 1 : 2 interactions with strength 0.696</div> <div>Residue TYR C 981 :<br/>to Residue LIG Z 1 : 2 interactions with strength 0.413</div> <div>Residue MET D 978 :<br/>to Residue LIG Z 1 : 1 interactions with strength 0.555</div>                                                                                                                                                                                                                                                                                              |                                                                                                                                                                        |     |              |              |              |                |            |            |               |  | <div>PiPi Interaction Analysis</div> <div>=====</div> <div>Residue TYR C 981 :<br/>to Residue LIG Z 1 : 1<br/>interactions with strength 1.000</div> <div>Residue LIG Z 1 :<br/>in Residue LIG Z 1 : 1<br/>interactions with strength 1.000<br/>2 interactions listed.</div> <div>CationPi Interaction Analysis</div> <div>=====</div> <div>=</div> <div>0 interactions listed.</div> <div>Ionic Interaction Analysis</div> |         |    |              |              |              |                |            |            |               |       |      |     |      |      |        |       |      |            |            |     |      |       |      |      |        |     |      |            |           |   |      |     |      |       |      |   |      |     |      |       |      |   |      |     |      |       |      |   |      |     |      |       |      |   |      |     |      |       |      |    |      |     |      |       |      |    |      |     |      |       |      |    |      |     |      |       |      |

|                                                                                                         |                                     |
|---------------------------------------------------------------------------------------------------------|-------------------------------------|
| Residue LIG Z 1 :<br>in Residue LIG Z 1 : 4 interactions with strength 1.145<br>10 interactions listed. | =====<br><br>0 interactions listed. |
| <b>Hydrogen Bond Analysis</b>                                                                           |                                     |

## References

1. Gonzalez Muniz, R.; Perez Ma. Jesus, de V.; Bonache de Marcos, M.A.; Ferrer Montiel, A.; Fernandez Carvajal, A.; De la Torr, e. R. Heterocyclic compounds as TRPM8 channel antagonists and uses thereof. *WO 2017005950* 2017, WO 2017005950.
2. Martin-Escura, C.; Medina-Peris, A.; Spear, L.A.; de la Torre Martinez, R.; Olivos-Ore, L.A.; Barahona, M.V.; Gonzalez-Rodriguez, S.; Fernandez-Ballester, G.; Fernandez-Carvajal, A.; Artalejo, A.R.; et al.  $\beta$ -Lactam TRPM8 Antagonist RGM8-51 Displays Antinociceptive Activity in Different Animal Models. *Int. J. Mol. Sci.* **2022**, *23*, 2692, doi:10.3390/ijms23052692.
